# Supplementary material for: Copper-catalyzed hydroaminocarbonylation of benzylidenecyclopropanes: synthesis of γ,δ-unsaturated amides
Source: Royal Society of Chemistry journal article supplement (doi:10.1039/d2cc02301f), 2022-01-01

# Supporting Information

## Copper-Catalyzed Hydroaminocarbonylation of Benzylidenecyclopropanes: Synthesis of $\gamma,\delta$ -Unsaturated Amides

Hui-Qing Geng,<sup>†</sup> Xiao-Feng Wu<sup>\*,†,#</sup>

<sup>†</sup> *Leibniz-Institut für Katalyse e.V., Albert-Einstein-Straße 29a, 18059 Rostock, Germany, E-mail: xiao-feng.wu@catalysis.de*

<sup>#</sup> *Dalian National Laboratory for Clean Energy, Dalian Institute of Chemical Physics, Chinese Academy of Sciences, 116023 Dalian, Liaoning, China, E-mail: xwu2020@dicp.ac.cn*

### Contents

|                                              |     |
|----------------------------------------------|-----|
| 1. General information.....                  | S2  |
| 2. Optimization of Reaction Conditions ..... | S3  |
| 3. Synthetic Procedure.....                  | S5  |
| 3.1 General procedure .....                  | S5  |
| 3.2 Isotope labeling experiment.....         | S5  |
| 3.3 1 mmol scale reaction.....               | S5  |
| 3.4 Failed example.....                      | S6  |
| 4 Analytic data of the Products .....        | S7  |
| 5. References .....                          | S13 |
| 6. NMR spectra.....                          | S14 |

## 1. General information

Unless otherwise noted, all commercial reagents were ordered from Sigma-Aldrich, TCI, ABCR, or Across. All solvents (anhydrous and under inert atmosphere) were collected by M BRAUN from the solvent purification system and used under standard Schlenk techniques. Benzylidenecyclopropanes (BCPs)<sup>1</sup> and hydroxyamine derivatives<sup>2,3</sup> were synthesized based on known literatures. Column chromatography was performed on silica gel (200-300 meshes) using *n*-pentane (bp. 36.1 °C), dichloromethane and ethyl acetate as eluents. All NMR spectra were recorded at ambient temperature using Bruker Advance 300 NMR, Bruker ARX 400 NMR spectrometers. Multiplets were assigned as follows: chemical shift ( $\delta$  ppm), multiplicity (s = singlet, d = doublet, t = triplet, q = quartet, m = multiplet, br = broad), coupling constant (Hz), and integration. All <sup>13</sup>C NMR spectra were broad-band <sup>1</sup>H decoupled. Gas chromatography (GC) analyses were performed on an Agilent HP-7890A instrument with a FID detector and HP-5 capillary column (polydimethylsiloxane with 5% phenyl groups, 30 m, 0.32 mm i.d. 0.25  $\mu$ m film thickness) using argon as carrier gas. High resolution mass spectra (HRMS) were recorded on an Agilent 6210 system. Because of the high toxicity of carbon monoxide, all reactions should be performed in an autoclave. The laboratory should be well-equipped with a CO detector and alarm system.

## 2. Optimization of Reaction Conditions

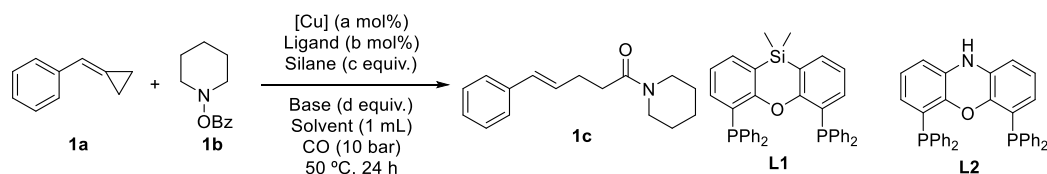

| [Cu]<br>(a mol%)            | Ligand<br>(b mol%) | Silane<br>(c equiv.)                 | Base<br>(d equiv.)      | Solvent<br>(1 mL) | T<br>(°C) | Yield<br>(%) |
|-----------------------------|--------------------|--------------------------------------|-------------------------|-------------------|-----------|--------------|
| CuCl (10)                   | Xantphos (10)      | Et <sub>2</sub> SiH <sub>2</sub> (3) | LiO <sup>t</sup> Bu (3) | Cycloheptane      | 50        | 24           |
| CuCl (10)                   | Xantphos (10)      | Et <sub>2</sub> SiH <sub>2</sub> (3) | LiO <sup>t</sup> Bu (3) | Toluene           | 50        | 15           |
| CuCl (10)                   | Xantphos (10)      | Et <sub>2</sub> SiH <sub>2</sub> (3) | LiO <sup>t</sup> Bu (3) | THF               | 50        | 10           |
| CuCl (10)                   | Xantphos (10)      | Et <sub>2</sub> SiH <sub>2</sub> (3) | LiO <sup>t</sup> Bu (3) | DCM               | 50        | 13           |
| CuCl (10)                   | Xantphos (10)      | Et <sub>2</sub> SiH <sub>2</sub> (3) | LiO <sup>t</sup> Bu (3) | MeCN              | 50        | 13           |
| CuCl (10)                   | Xantphos (10)      | Et <sub>2</sub> SiH <sub>2</sub> (3) | LiO <sup>t</sup> Bu (3) | 1,4-Dioxane       | 50        | 22           |
| CuCl (10)                   | Xantphos (10)      | Et <sub>2</sub> SiH <sub>2</sub> (3) | LiO <sup>t</sup> Bu (3) | DMAc              | 50        | trace        |
| CuCl (10)                   | Xantphos (10)      | Et <sub>2</sub> SiH <sub>2</sub> (3) | LiO <sup>t</sup> Bu (3) | DMSO              | 50        | 0            |
| CuCl (10)                   | Xantphos (10)      | Et <sub>2</sub> SiH <sub>2</sub> (3) | LiO <sup>t</sup> Bu (3) | DCE               | 50        | 43           |
| CuCl (10)                   | Xantphos (10)      | Et <sub>2</sub> SiH <sub>2</sub> (3) | LiO <sup>t</sup> Bu (3) | <i>n</i> -Hexane  | 50        | 14           |
| CuCl (10)                   | Xantphos (10)      | Et <sub>2</sub> SiH <sub>2</sub> (3) | LiO <sup>t</sup> Bu (3) | PhF               | 50        | 22           |
| CuCl (10)                   | Xantphos (10)      | Et <sub>2</sub> SiH <sub>2</sub> (3) | LiO <sup>t</sup> Bu (3) | PhCl              | 50        | 26           |
| CuCl (10)                   | Xantphos (10)      | Et <sub>2</sub> SiH <sub>2</sub> (3) | LiO <sup>t</sup> Bu (3) | PhCF <sub>3</sub> | 50        | 18           |
| <hr/>                       |                    |                                      |                         |                   |           |              |
| CuCl (5)                    | Xantphos (5)       | Et <sub>2</sub> SiH <sub>2</sub> (3) | LiO <sup>t</sup> Bu (3) | DCE               | 50        | 32           |
| CuCl (7.5)                  | Xantphos (7.5)     | Et <sub>2</sub> SiH <sub>2</sub> (3) | LiO <sup>t</sup> Bu (3) | DCE               | 50        | 54           |
| CuCl (10)                   | Xantphos (10)      | Et <sub>2</sub> SiH <sub>2</sub> (3) | LiO <sup>t</sup> Bu (3) | DCE               | 50        | 43           |
| CuCl (12.5)                 | Xantphos (12.5)    | Et <sub>2</sub> SiH <sub>2</sub> (3) | LiO <sup>t</sup> Bu (3) | DCE               | 50        | 42           |
| CuCl (15)                   | Xantphos (15)      | Et <sub>2</sub> SiH <sub>2</sub> (3) | LiO <sup>t</sup> Bu (3) | DCE               | 50        | 48           |
| CuCl (20)                   | Xantphos (50)      | Et <sub>2</sub> SiH <sub>2</sub> (3) | LiO <sup>t</sup> Bu (3) | DCE               | 50        | 38           |
| <hr/>                       |                    |                                      |                         |                   |           |              |
| CuCl (7.5)                  | Xantphos (10)      | Et <sub>2</sub> SiH <sub>2</sub> (3) | LiO <sup>t</sup> Bu (3) | DCE               | 50        | 43           |
| CuCl (7.5)                  | Xantphos (12.5)    | Et <sub>2</sub> SiH <sub>2</sub> (3) | LiO <sup>t</sup> Bu (3) | DCE               | 50        | 57           |
| CuCl (7.5)                  | Xantphos (15)      | Et <sub>2</sub> SiH <sub>2</sub> (3) | LiO <sup>t</sup> Bu (3) | DCE               | 50        | 59           |
| CuCl (7.5)                  | Xantphos (17.5)    | Et <sub>2</sub> SiH <sub>2</sub> (3) | LiO <sup>t</sup> Bu (3) | DCE               | 50        | 53           |
| <hr/>                       |                    |                                      |                         |                   |           |              |
| CuCl (7.5)                  | DPPP (15)          | Et <sub>2</sub> SiH <sub>2</sub> (3) | LiO <sup>t</sup> Bu (3) | DCE               | 50        | 0            |
| CuCl (7.5)                  | BINAP (15)         | Et <sub>2</sub> SiH <sub>2</sub> (3) | LiO <sup>t</sup> Bu (3) | DCE               | 50        | 0            |
| CuCl (7.5)                  | DPPB (15)          | Et <sub>2</sub> SiH <sub>2</sub> (3) | LiO <sup>t</sup> Bu (3) | DCE               | 50        | 0            |
| CuCl (7.5)                  | DPPE (15)          | Et <sub>2</sub> SiH <sub>2</sub> (3) | LiO <sup>t</sup> Bu (3) | DCE               | 50        | 0            |
| CuCl (7.5)                  | DPPBz (15)         | Et <sub>2</sub> SiH <sub>2</sub> (3) | LiO <sup>t</sup> Bu (3) | DCE               | 50        | 0            |
| CuCl (7.5)                  | DPPF (15)          | Et <sub>2</sub> SiH <sub>2</sub> (3) | LiO <sup>t</sup> Bu (3) | DCE               | 50        | 28           |
| CuCl (7.5)                  | Xantphos (15)      | Et <sub>2</sub> SiH <sub>2</sub> (3) | LiO <sup>t</sup> Bu (3) | DCE               | 50        | 57           |
| CuCl (7.5)                  | L1 (15)            | Et <sub>2</sub> SiH <sub>2</sub> (3) | LiO <sup>t</sup> Bu (3) | DCE               | 50        | 27           |
| CuCl (7.5)                  | L2 (15)            | Et <sub>2</sub> SiH <sub>2</sub> (3) | LiO <sup>t</sup> Bu (3) | DCE               | 50        | 0            |
| <hr/>                       |                    |                                      |                         |                   |           |              |
| CuCl <sub>2</sub> (7.5)     | Xantphos (15)      | Et <sub>2</sub> SiH <sub>2</sub> (3) | LiO <sup>t</sup> Bu (3) | DCE               | 50        | 34           |
| CuCN (7.5)                  | Xantphos (15)      | Et <sub>2</sub> SiH <sub>2</sub> (3) | LiO <sup>t</sup> Bu (3) | DCE               | 50        | 0            |
| Cu(OAc) <sub>2</sub> (7.5)  | Xantphos (15)      | Et <sub>2</sub> SiH <sub>2</sub> (3) | LiO <sup>t</sup> Bu (3) | DCE               | 50        | 72           |
| CuI (7.5)                   | Xantphos (15)      | Et <sub>2</sub> SiH <sub>2</sub> (3) | LiO <sup>t</sup> Bu (3) | DCE               | 50        | 29           |
| Cu(OTf) <sub>2</sub> (7.5)  | Xantphos (15)      | Et <sub>2</sub> SiH <sub>2</sub> (3) | LiO <sup>t</sup> Bu (3) | DCE               | 50        | 49           |
| Cu(acac) <sub>2</sub> (7.5) | Xantphos (15)      | Et <sub>2</sub> SiH <sub>2</sub> (3) | LiO <sup>t</sup> Bu (3) | DCE               | 50        | 55           |
| CuSO <sub>4</sub> (7.5)     | Xantphos (15)      | Et <sub>2</sub> SiH <sub>2</sub> (3) | LiO <sup>t</sup> Bu (3) | DCE               | 50        | 11           |
| CuCl (7.5)                  | Xantphos (15)      | Et <sub>2</sub> SiH <sub>2</sub> (3) | LiO <sup>t</sup> Bu (3) | DCE               | 50        | 57           |
| <hr/>                       |                    |                                      |                         |                   |           |              |
| Cu(OAc) <sub>2</sub> (7.5)  | Xantphos (15)      | Et <sub>2</sub> SiH <sub>2</sub> (3) | NaO <sup>t</sup> Bu (3) | DCE               | 50        | 0            |
| Cu(OAc) <sub>2</sub> (7.5)  | Xantphos (15)      | Et <sub>2</sub> SiH <sub>2</sub> (3) | KO <sup>t</sup> Bu (3)  | DCE               | 50        | 0            |
| Cu(OAc) <sub>2</sub> (7.5)  | Xantphos (15)      | Et <sub>2</sub> SiH <sub>2</sub> (3) | NaOEt (3)               | DCE               | 50        | 49           |
| Cu(OAc) <sub>2</sub> (7.5)  | Xantphos (15)      | Et <sub>2</sub> SiH <sub>2</sub> (3) | NaOMe (3)               | DCE               | 50        | 34           |
| Cu(OAc) <sub>2</sub> (7.5)  | Xantphos (15)      | Et <sub>2</sub> SiH <sub>2</sub> (3) | LiOMe (3)               | DCE               | 50        | 79           |
| Cu(OAc) <sub>2</sub> (7.5)  | Xantphos (15)      | Et <sub>2</sub> SiH <sub>2</sub> (3) | NaOPh (3)               | DCE               | 50        | 0            |
| Cu(OAc) <sub>2</sub> (7.5)  | Xantphos (15)      | Et <sub>2</sub> SiH <sub>2</sub> (3) | KOMe (3)                | DCE               | 50        | 0            |
| Cu(OAc) <sub>2</sub> (7.5)  | Xantphos (15)      | Et <sub>2</sub> SiH <sub>2</sub> (3) | LiO <sup>t</sup> Bu (3) | DCE               | 50        | 72           |

| [Cu]<br>(a mol%)           | Ligand<br>(b mol%) | Silane<br>(c equiv.)                 | Base<br>(d equiv.)        | Solvent<br>(1 mL) | T<br>(°C) | Yield<br>(%) |
|----------------------------|--------------------|--------------------------------------|---------------------------|-------------------|-----------|--------------|
| Cu(OAc) <sub>2</sub> (7.5) | Xantphos (15)      | Et <sub>3</sub> SiH (3)              | LiOMe (3)                 | DCE               | 50        | 0            |
| Cu(OAc) <sub>2</sub> (7.5) | Xantphos (15)      | (EtO) <sub>3</sub> SiH (3)           | LiOMe (3)                 | DCE               | 50        | 0            |
| Cu(OAc) <sub>2</sub> (7.5) | Xantphos (15)      | (EtO) <sub>2</sub> MeSiH (3)         | LiOMe (3)                 | DCE               | 50        | 83           |
| Cu(OAc) <sub>2</sub> (7.5) | Xantphos (15)      | Ph <sub>2</sub> SiH <sub>2</sub> (3) | LiOMe (3)                 | DCE               | 50        | 80           |
| Cu(OAc) <sub>2</sub> (7.5) | Xantphos (15)      | PhSiH <sub>3</sub> (3)               | LiOMe (3)                 | DCE               | 50        | 23           |
| Cu(OAc) <sub>2</sub> (7.5) | Xantphos (15)      | PhMeSiH (3)                          | LiOMe (3)                 | DCE               | 50        | 0            |
| Cu(OAc) <sub>2</sub> (7.5) | Xantphos (15)      | (TMS) <sub>3</sub> SiH (3)           | LiOMe (3)                 | DCE               | 50        | 0            |
| Cu(OAc) <sub>2</sub> (7.5) | Xantphos (15)      | (MeO) <sub>2</sub> MeSiH (3)         | LiOMe (3)                 | DCE               | 50        | 78           |
| Cu(OAc) <sub>2</sub> (7.5) | Xantphos (15)      | Et <sub>2</sub> SiH <sub>2</sub> (3) | LiOMe (3)                 | DCE               | 50        | 79           |
| Cu(OAc) <sub>2</sub> (7.5) | Xantphos (15)      | PhMeSiH <sub>2</sub> (3)             | LiOMe (3)                 | DCE               | 50        | 77           |
| <hr/>                      |                    |                                      |                           |                   |           |              |
| Cu(OAc) <sub>2</sub> (7.5) | Xantphos (15)      | (EtO) <sub>2</sub> MeSiH (3)         | LiOMe (1)                 | DCE               | 50        | 86           |
| Cu(OAc) <sub>2</sub> (7.5) | Xantphos (15)      | (EtO) <sub>2</sub> MeSiH (3)         | LiO <sup>t</sup> Bu (2)   | DCE               | 50        | 73           |
| Cu(OAc) <sub>2</sub> (7.5) | Xantphos (15)      | (EtO) <sub>2</sub> MeSiH (3)         | LiO <sup>t</sup> Bu (2.5) | DCE               | 50        | 66           |
| Cu(OAc) <sub>2</sub> (7.5) | Xantphos (15)      | (EtO) <sub>2</sub> MeSiH (3)         | LiO <sup>t</sup> Bu (3)   | DCE               | 50        | 83           |
| Cu(OAc) <sub>2</sub> (7.5) | Xantphos (15)      | (EtO) <sub>2</sub> MeSiH (3)         | LiO <sup>t</sup> Bu (3.5) | DCE               | 50        | 76           |
| <hr/>                      |                    |                                      |                           |                   |           |              |
| Cu(OAc) <sub>2</sub> (7.5) | Xantphos (15)      | (EtO) <sub>2</sub> MeSiH (1.5)       | LiOMe (1)                 | DCE               | 50        | 60           |
| Cu(OAc) <sub>2</sub> (7.5) | Xantphos (15)      | (EtO) <sub>2</sub> MeSiH (2.0)       | LiOMe (1)                 | DCE               | 50        | 60           |
| Cu(OAc) <sub>2</sub> (7.5) | Xantphos (15)      | (EtO) <sub>2</sub> MeSiH (2.5)       | LiOMe (1)                 | DCE               | 50        | 81           |
| Cu(OAc) <sub>2</sub> (7.5) | Xantphos (15)      | (EtO) <sub>2</sub> MeSiH (3.0)       | LiOMe (1)                 | DCE               | 50        | 86           |
| Cu(OAc) <sub>2</sub> (7.5) | Xantphos (15)      | (EtO) <sub>2</sub> MeSiH (4.0)       | LiOMe (1)                 | DCE               | 50        | 74           |
| <hr/>                      |                    |                                      |                           |                   |           |              |
| Cu(OAc) <sub>2</sub> (7.5) | Xantphos (15)      | (EtO) <sub>2</sub> MeSiH (3.0)       | LiOMe (1)                 | DCE               | 40        | 72           |
| Cu(OAc) <sub>2</sub> (7.5) | Xantphos (15)      | (EtO) <sub>2</sub> MeSiH (3.0)       | LiOMe (1)                 | DCE               | 50        | 86           |
| Cu(OAc) <sub>2</sub> (7.5) | Xantphos (15)      | (EtO) <sub>2</sub> MeSiH (3.0)       | LiOMe (1)                 | DCE               | 60        | 62           |
| Cu(OAc) <sub>2</sub> (7.5) | Xantphos (15)      | (EtO) <sub>2</sub> MeSiH (3.0)       | LiOMe (1)                 | DCE               | 70        | 60           |

### 3. Synthetic Procedure

#### 3.1 General procedure

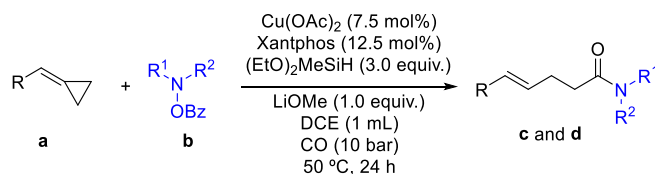

An oven dried 4 mL screw-cap vial equipped with a septum and a stirring bar was charged with  $\text{Cu(OAc)}_2$  (7.5 mol%), DPPP (12.5 mol%), **b** (1.5 equiv.) and LiOMe (1.0 equiv.). The vial was sealed, connected to atmosphere with a small cannula, evacuated, and backfilled with argon three times. Then DCE (1.0 mL) was added *via* syringe. To this suspension, BCPs **a** (0.2 mmol) and  $(\text{EtO})_2\text{MeSiH}_2$  (3.0 equiv.) were added *via* Hamilton® syringe. The vial was placed on an alloy plate and transferred into a 300 mL stovetop autoclave (4560 series from Parr instrument company®). The autoclave was flushed one time with nitrogen (<10 bar) and three times with CO (<10 bar). The autoclave was then charged with CO (10 bar). The autoclave was then placed into an aluminum block on a magnetic stirrer. The reaction mixture was stirred (500 rpm) for 24 h at 50 °C. Then it was cooled to room temperature and the pressure was released carefully. The reaction mixture was added water (1 mL) and extracted by DCE (1 mL x 2). The organic phase was dried by  $\text{Na}_2\text{SO}_4$  and removed under vacuum. The reaction purified by gradient column chromatography to yield products **c** or **d**.

#### 3.2 Isotope labeling experiment.

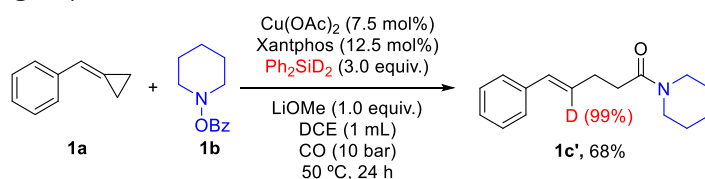

**1c'** Pentane/ethyl acetate = 8/3, colorless oil (33.2 mg, 68% yield).

$^1\text{H NMR}$  (300 MHz,  $\text{CDCl}_3$ )  $\delta$  7.28–7.10 (m, 5H), 6.35 (s, 1H), 3.59–3.28 (m, 4H), 2.50–2.38 (m, 4H), 1.60–1.44 (m, 6H).  $^{13}\text{C NMR}$  (75 MHz,  $\text{CDCl}_3$ )  $\delta$  170.5, 137.5, 130.5, 128.5, 127.0, 126.0, 46.8, 42.8, 33.0, 28.7, 26.5, 25.7, 24.6.

#### 3.3 1 mmol scale reaction

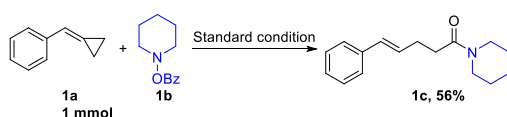

An oven dried 12 mL screw-cap vial equipped with a septum and a stirring bar was charged with  $\text{Cu(OAc)}_2$  (7.5 mol%), DPPP (12.5 mol%), **1b** (1.5 equiv.) and LiOMe (1.0 equiv.). The vial was sealed, connected to atmosphere with a small cannula, evacuated, and backfilled with argon three times. Then DCE (5.0 mL) was added *via* syringe. To this suspension, BCPs **1a** (1 mmol) and  $(\text{EtO})_2\text{MeSiH}_2$  (3.0 equiv.) were added *via* Hamilton® syringe. The vial was placed on an alloy plate and transferred into a 300 mL

stovetop autoclave (4560 series from Parr instrument company®). The autoclave was flushed one time with nitrogen (<10 bar) and three times with CO (<10 bar). The autoclave was then charged with CO (10 bar). The autoclave was then placed into an aluminum block on a magnetic stirrer. The reaction mixture was stirred (500 rpm) for 24 h at 50 °C. Then it was cooled to room temperature and the pressure was released carefully. The reaction mixture was added water (3 mL) and extracted by DCE (3 mL x 2). The organic phase was dried by Na<sub>2</sub>SO<sub>4</sub> and removed under vacuum. The reaction purified by gradient column chromatography (Pentane/ethyl acetate = 8/3) to yield product 1c in 56% yield (136.1 mg).

### 3.4 Failed example

Failed examples

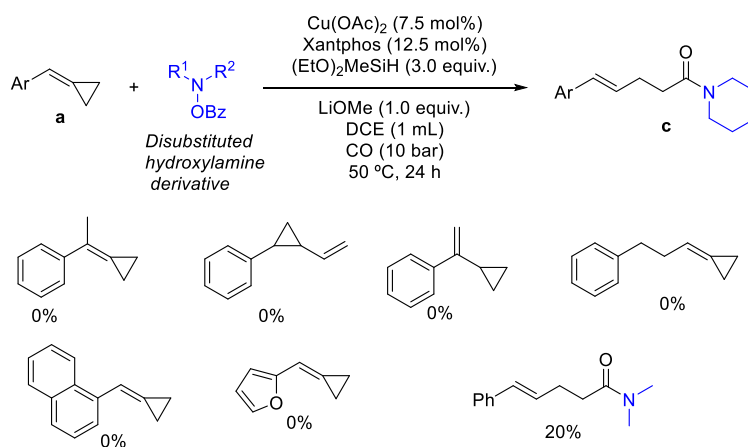

## 4 Analytic data of the Products

### (*E*)-5-Phenyl-1-(piperidin-1-yl)pent-4-en-1-one (1c)

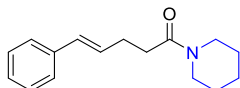

Pentane/ethyl acetate = 8/3, colorless oil (37.9 mg, 78% yield).  $^1\text{H NMR}$  (400 MHz,  $\text{CDCl}_3$ )  $\delta$  7.21 (dd,  $J = 8.3, 1.3$  Hz, 2H), 7.18 – 7.14 (m, 2H), 7.09 – 7.05 (m, 1H), 6.31 (d,  $J = 15.9$  Hz, 1H), 6.14 (dt,  $J = 15.8, 6.6$  Hz, 1H), 3.43 – 3.30 (m, 4H), 2.46 – 2.34 (m, 4H), 1.55 – 1.42 (m, 6H).  $^{13}\text{C NMR}$  (101 MHz,  $\text{CDCl}_3$ )  $\delta$  170.5, 137.5, 130.6, 129.6, 128.5, 127.0, 126.0, 46.6, 42.7, 33.1, 28.9, 26.5, 25.7, 24.6. HRMS (ESI-TOF):  $m/z$  calcd. for  $\text{C}_{16}\text{H}_{22}\text{NO}^+$  ( $[\text{M}+\text{H}]^+$ ) 244.1696, found 244.1701.

### (*E*)-5-(4-Isobutylphenyl)-1-(piperidin-1-yl)pent-4-en-1-one (2c)

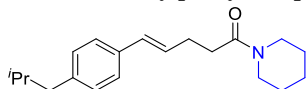

Pentane/ethyl acetate = 8/3, colorless oil (43.1 mg, 72% yield).  $^1\text{H NMR}$  (300 MHz,  $\text{CDCl}_3$ )  $\delta$  7.18 (d,  $J = 7.9$  Hz, 2H), 6.99 (d,  $J = 8.1$  Hz, 2H), 6.34 (d,  $J = 15.9$  Hz, 1H), 6.15 (dt,  $J = 15.8, 6.6$  Hz, 1H), 3.49 (t,  $J = 5.0$  Hz, 2H), 3.33 (t,  $J = 5.0$  Hz, 2H), 2.50 – 2.34 (m, 6H), 1.82 – 1.72 (m, 1H), 1.60 – 1.43 (m, 6H), 0.83 (s, 3H), 0.80 (s, 3H).  $^{13}\text{C NMR}$  (75 MHz,  $\text{CDCl}_3$ )  $\delta$  170.5, 140.7, 135.0, 130.5, 129.3, 128.6, 125.8, 46.7, 45.1, 42.7, 33.2, 31.5, 30.2, 28.9, 26.5, 25.6, 24.6, 22.4. HRMS (ESI-TOF):  $m/z$  calcd. for  $\text{C}_{20}\text{H}_{30}\text{NO}^+$  ( $[\text{M}+\text{H}]^+$ ) 300.2322, found 300.2325.

### (*E*)-5-(4-(*tert*-Butyl)phenyl)-1-(piperidin-1-yl)pent-4-en-1-one (3c)

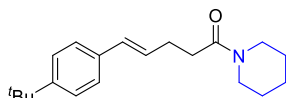

Pentane/ethyl acetate = 8/3, colorless oil (73.6 mg, 73% yield).  $^1\text{H NMR}$  (300 MHz,  $\text{CDCl}_3$ )  $\delta$  7.24 – 7.17 (m, 4H), 6.34 (d,  $J = 15.9$  Hz, 1H), 6.15 (dt,  $J = 15.8, 6.6$  Hz, 1H), 3.42 (d,  $J = 25.9$  Hz, 4H), 2.53 – 2.28 (m, 4H), 1.60 – 1.43 (m, 6H), 1.23 (s, 9H).  $^{13}\text{C NMR}$  (75 MHz,  $\text{CDCl}_3$ )  $\delta$  170.5, 150.0, 134.7, 130.3, 128.7, 125.7, 125.4, 34.5, 33.2, 31.3, 28.8, 24.6. HRMS (ESI-TOF):  $m/z$  calcd. for  $\text{C}_{20}\text{H}_{30}\text{NO}^+$  ( $[\text{M}+\text{H}]^+$ ) 300.2322, found 300.2327.

### (*E*)-1-(Piperidin-1-yl)-5-(*m*-tolyl)pent-4-en-1-one (4c)

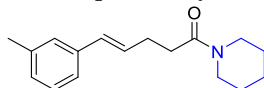

Pentane/ethyl acetate = 8/3, colorless oil (34.4 mg, 67% yield).  $^1\text{H NMR}$  (300 MHz,  $\text{CDCl}_3$ )  $\delta$  7.19 – 7.09 (m, 3H), 7.04 – 6.97 (m, 1H), 6.40 (d,  $J = 15.9$  Hz, 1H), 6.25 (dt,  $J = 15.8, 6.4$  Hz, 1H), 3.49 (s, 4H), 2.51 (dtd,  $J = 12.2, 6.3, 1.9$  Hz, 4H), 2.33 (s, 3H), 1.66 – 1.51 (m, 6H).  $^{13}\text{C NMR}$  (75 MHz,  $\text{CDCl}_3$ )  $\delta$  170.5, 138.0, 137.4, 130.6, 129.3, 128.3, 127.8, 126.7, 123.1, 46.6, 42.8, 33.1, 28.8, 24.5, 21.4. HRMS (ESI-TOF):  $m/z$  calcd. for  $\text{C}_{17}\text{H}_{24}\text{NO}^+$  ( $[\text{M}+\text{H}]^+$ ) 258.1852, found 258.1854.

### (*E*)-1-(Piperidin-1-yl)-5-(*o*-tolyl)pent-4-en-1-one (5c)

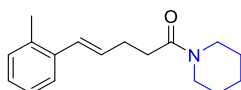

Pentane/ethyl acetate = 8/3, colorless oil (30.3 mg, 59% yield).  $^1\text{H NMR}$  (300 MHz,  $\text{CDCl}_3$ )  $\delta$  7.43 – 7.38 (m, 1H), 7.16 – 7.09 (m, 3H), 6.63 (d,  $J = 15.7$  Hz, 1H), 6.13 (dt,  $J = 15.7, 6.7$  Hz, 1H), 3.49 (d,  $J = 35.8$  Hz, 4H), 2.60 – 2.46 (m, 4H), 2.32 (s, 3H), 1.61 (ddd,  $J = 19.8, 12.2, 4.1$  Hz, 6H).  $^{13}\text{C NMR}$  (75 MHz,  $\text{CDCl}_3$ )  $\delta$  170.4, 136.6, 134.9, 130.8, 130.1, 128.4, 126.9, 126.0, 125.4, 46.6, 42.7, 33.2, 29.1, 26.5, 25.6, 24.5, 19.8. HRMS (ESI-TOF):  $m/z$  calcd. for  $\text{C}_{17}\text{H}_{24}\text{NO}^+$  ( $[\text{M}+\text{H}]^+$ ) 258.1852, found 258.1856.

### (*E*)-5-(4-(Dimethylamino)phenyl)-1-(piperidin-1-yl)pent-4-en-1-one (6c)

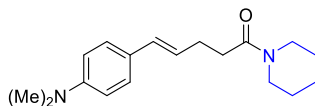

Pentane/ethyl acetate = 1/1, colorless oil (37.1 mg, 65% yield).  $^1\text{H NMR}$  (300 MHz,  $\text{CDCl}_3$ )  $\delta$  7.23 (d,  $J = 8.7$  Hz, 2H), 6.68 (d,  $J = 8.7$  Hz, 2H), 6.34 (d,  $J = 15.8$  Hz, 1H), 6.05 (dt,  $J = 15.8, 6.6$  Hz, 1H), 3.56 (t,  $J = 6.0$  Hz, 2H), 3.40 (t,  $J = 6.0$  Hz, 2H), 2.94 (s, 6H), 2.54 – 2.42 (m, 4H), 1.67 – 1.51 (m, 6H).  $^{13}\text{C NMR}$  (75 MHz,  $\text{CDCl}_3$ )  $\delta$  170.6, 149.6, 130.2, 126.8, 125.3, 112.6, 46.6, 42.6, 40.6, 33.4, 28.9, 26.5, 25.5, 24.5. HRMS (ESI-TOF):  $m/z$  calcd. for  $\text{C}_{18}\text{H}_{27}\text{N}_2\text{O}^+$  ( $[\text{M}+\text{H}]^+$ ) 287.2118, found 287.2123.

**(E)-5-(4-Morpholinophenyl)-1-(piperidin-1-yl)pent-4-en-1-one (7c)**

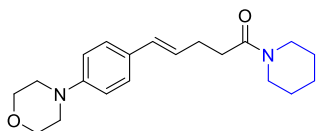

Pentane/ethyl acetate = 1/1, white solid (38.7 mg, 59% yield).  $^1\text{H NMR}$  (300 MHz,  $\text{CDCl}_3$ )  $\delta$  7.26 (d,  $J$  = 8.7 Hz, 2H), 6.84 (d,  $J$  = 8.5 Hz, 2H), 6.36 (d,  $J$  = 15.9 Hz, 1H), 6.12 (dt,  $J$  = 15.8, 6.6 Hz, 1H), 3.91 – 3.78 (m, 4H), 3.62 – 3.50 (m, 2H), 3.46 – 3.33 (m, 2H), 3.24 – 3.10 (m, 4H), 2.62 – 2.33 (m, 4H), 1.68 – 1.50 (m, 6H).  $^{13}\text{C NMR}$  (75 MHz,  $\text{CDCl}_3$ )  $\delta$  170.5, 129.9, 127.0, 126.8, 115.6, 66.8, 49.3, 46.6, 42.6, 33.3, 31.5, 30.1, 28.8, 26.5, 25.6, 24.5. **HRMS** (ESI-TOF):  $m/z$  calcd. for  $\text{C}_{20}\text{H}_{29}\text{N}_2\text{O}_2^+$  ( $[\text{M}+\text{H}]^+$ ) 329.2224, found 329.2229.

**(E)-1-(Piperidin-1-yl)-5-(4-(trifluoromethyl)phenyl)pent-4-en-1-one (8c)**

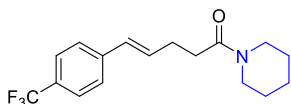

Pentane/ethyl acetate = 2/1, white solid (40.4 mg, 65% yield).  $^1\text{H NMR}$  (300 MHz,  $\text{CDCl}_3$ )  $\delta$  7.52 (d,  $J$  = 8.2 Hz, 2H), 7.42 (d,  $J$  = 8.2 Hz, 2H), 6.51 – 6.32 (m, 2H), 3.49 (s, 4H), 2.55 (m, 4H), 1.67 – 1.53 (m, 6H).  $^{13}\text{C NMR}$  (75 MHz,  $\text{CDCl}_3$ )  $\delta$  170.2, 141.0, 132.5, 129.4, 128.7, 126.2, 125.4 (q,  $J$  = 3.8 Hz), 124.2 (q,  $J$  = 271.7 Hz), 32.7, 28.8, 24.5.  $^{19}\text{F NMR}$  (282 MHz,  $\text{CDCl}_3$ )  $\delta$  -62.40. **HRMS** (ESI-TOF):  $m/z$  calcd. for  $\text{C}_{17}\text{H}_{21}\text{F}_3\text{NO}^+$  ( $[\text{M}+\text{H}]^+$ ) 312.1570, found 312.1575.

**(E)-5-(4-Fluorophenyl)-1-(piperidin-1-yl)pent-4-en-1-one (9c)**

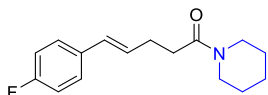

Pentane/ethyl acetate = 8/3, colorless oil (35.5 mg, 68% yield).  $^1\text{H NMR}$  (300 MHz,  $\text{CDCl}_3$ )  $\delta$  7.33 – 7.16 (m, 2H), 6.98 – 6.76 (m, 2H), 6.32 (d,  $J$  = 15.9 Hz, 1H), 6.11 (dt,  $J$  = 15.8, 6.4 Hz, 1H), 3.41 (d,  $J$  = 41.5 Hz, 4H), 2.52 – 2.38 (m, 4H), 1.60 – 1.44 (m, 6H).  $^{13}\text{C NMR}$  (75 MHz,  $\text{CDCl}_3$ )  $\delta$  170.4, 162.0 (d,  $J$  = 245.7 Hz), 133.7 (d,  $J$  = 3.2 Hz), 129.4, 129.4 (d,  $J$  = 2.1 Hz), 127.4 (d,  $J$  = 7.9 Hz), 115.3 (d,  $J$  = 21.5 Hz), 46.7, 42.8, 33.0, 28.7, 26.5, 25.6, 24.6.  $^{19}\text{F NMR}$  (282 MHz,  $\text{CDCl}_3$ )  $\delta$  -115.48. **HRMS** (ESI-TOF):  $m/z$  calcd. for  $\text{C}_{16}\text{H}_{21}\text{FNO}^+$  ( $[\text{M}+\text{H}]^+$ ) 262.1602, found 262.1602.

**(E)-5-(3-Fluorophenyl)-1-(piperidin-1-yl)pent-4-en-1-one (10c)**

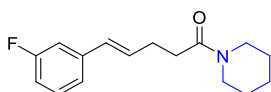

Pentane/ethyl acetate = 8/3, colorless oil (37.6 mg, 72% yield).  $^1\text{H NMR}$  (300 MHz,  $\text{CDCl}_3$ )  $\delta$  7.26 – 7.20 (m, 1H), 7.10 – 7.00 (m, 2H), 6.87 (tdd,  $J$  = 8.5, 2.6, 1.0 Hz, 1H), 6.39 (d,  $J$  = 16.0 Hz, 1H), 6.27 (dt,  $J$  = 15.8, 6.2 Hz, 1H), 3.47 (s, 4H), 2.58 – 2.44 (m, 4H), 1.60 (m, 6H).  $^{13}\text{C NMR}$  (75 MHz,  $\text{CDCl}_3$ )  $\delta$  170.2, 163.1 (d,  $J$  = 244.8 Hz), 140.0 (d,  $J$  = 7.8 Hz), 131.1, 129.9 (d,  $J$  = 8.5 Hz), 129.5 (d,  $J$  = 2.6 Hz), 121.9 (d,  $J$  = 2.7 Hz), 113.8 (d,  $J$  = 21.4 Hz), 112.4 (d,  $J$  = 21.7 Hz), 46.4, 42.8, 32.8, 28.6, 24.5.  $^{19}\text{F NMR}$  (282 MHz,  $\text{CDCl}_3$ )  $\delta$  -113.83. **HRMS** (ESI-TOF):  $m/z$  calcd. for  $\text{C}_{16}\text{H}_{21}\text{FNO}^+$  ( $[\text{M}+\text{H}]^+$ ) 262.1602, found 262.1608.

**(E)-5-(4-Chlorophenyl)-1-(piperidin-1-yl)pent-4-en-1-one (11c)**

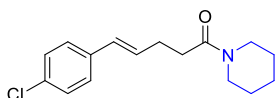

Pentane/ethyl acetate = 2/1, white solid (31.6 mg, 57% yield).  $^1\text{H NMR}$  (300 MHz,  $\text{CDCl}_3$ )  $\delta$  7.18 (s, 4H), 6.31 (d,  $J$  = 15.9, 1H), 6.17 (dt,  $J$  = 15.8, 6.4 Hz, 1H), 3.41 (d,  $J$  = 46.3 Hz, 4H), 2.51 – 2.36 (m, 4H), 1.60 – 1.44 (m, 6H).  $^{13}\text{C NMR}$  (75 MHz,  $\text{CDCl}_3$ )  $\delta$  170.2, 136.0, 132.5, 130.3, 129.3, 128.5, 127.2, 46.6, 42.7, 32.8, 28.7, 26.5, 25.5, 24.5. **HRMS** (ESI-TOF):  $m/z$  calcd. for  $\text{C}_{16}\text{H}_{21}\text{ClNO}^+$  ( $[\text{M}+\text{H}]^+$ ) 278.1306, found 278.1312.

**(E)-5-(Benzo[d][1,3]dioxol-5-yl)-1-(piperidin-1-yl)pent-4-en-1-one (12c)**

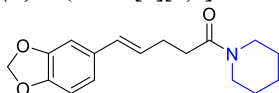



Pentane/ethyl acetate = 1/1, white solid (40.2 mg, 70% yield).  $^1\text{H NMR}$  (300 MHz,  $\text{CDCl}_3$ )  $\delta$  6.89 (d,  $J$  = 1.5 Hz, 1H), 6.77 – 6.70 (m, 2H), 6.34 (d,  $J$  = 15.8 Hz, 1H), 6.14 – 6.04 (m, 1H), 5.93 (s, 2H), 3.48 (s, 4H), 2.54 – 2.44 (m, 4H), 1.66 – 1.52 (m, 6H).  $^{13}\text{C NMR}$  (75 MHz,  $\text{CDCl}_3$ )  $\delta$  170.5, 147.9, 146.7, 132.0, 130.1, 127.8, 120.4, 108.2, 105.4, 100.9, 33.1, 28.7, 24.5. **HRMS** (ESI-TOF):  $m/z$  calcd. for  $\text{C}_{17}\text{H}_{22}\text{NO}_3^+$  ( $[\text{M}+\text{H}]^+$ ) 288.1594, found 288.1604.

**(E)-5-(3,5-Dimethoxyphenyl)-1-(piperidin-1-yl)pent-4-en-1-one (13c)**

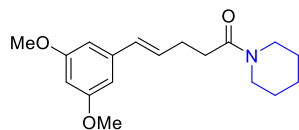

Pentane/ethyl acetate = 1/1, colorless oil (40.6 mg, 67% yield).  $^1\text{H NMR}$  (300 MHz,  $\text{CDCl}_3$ )  $\delta$  6.51 (d,  $J$  = 2.3 Hz, 2H), 6.41 – 6.34 (m, 2H), 6.27 (dt,  $J$  = 15.8, 6.2 Hz, 1H), 3.80 (s, 6H), 3.53 (d,  $J$  = 17.3 Hz, 4H), 2.61 – 2.48 (m, 4H), 1.68 – 1.54 (m, 6H).  $^{13}\text{C NMR}$  (75 MHz,  $\text{CDCl}_3$ )  $\delta$  170.3, 160.8, 139.5, 130.5, 130.1, 104.0, 99.3, 55.2, 46.7, 42.8, 32.8, 28.7, 24.5. **HRMS** (ESI-TOF):  $m/z$  calcd. for  $\text{C}_{18}\text{H}_{26}\text{NO}_3^+$  ( $[\text{M}+\text{H}]^+$ ) 304.1907, found 304.1917.

**(E)-1-(Piperidin-1-yl)-5-(4-((trifluoromethyl)thio)phenyl)pent-4-en-1-one (14c)**

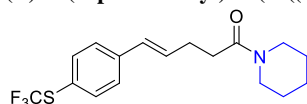

Pentane/ethyl acetate = 2/1, colorless oil (34 mg, 35% yield).  $^1\text{H NMR}$  (300 MHz,  $\text{CDCl}_3$ )  $\delta$  7.56 (d,  $J$  = 8.3 Hz, 2H), 7.39 – 7.35 (m, 2H), 6.48 – 6.30 (m, 2H), 3.49 (s, 4H), 2.60 – 2.46 (m, 4H), 1.67 – 1.52 (m, 6H).  $^{13}\text{C NMR}$  (75 MHz,  $\text{CDCl}_3$ )  $\delta$  170.2, 140.2, 136.5, 132.4, 129.6 (q,  $J$  = 307.9 Hz), 129.4, 126.9, 32.7, 28.8, 24.5.  $^{19}\text{F NMR}$  (282 MHz,  $\text{CDCl}_3$ )  $\delta$  -42.98. **HRMS** (ESI-TOF):  $m/z$  calcd. for  $\text{C}_{17}\text{H}_{21}\text{F}_3\text{NOS}^+$  ( $[\text{M}+\text{H}]^+$ ) 344.1290, found 344.1295.

**(E)-1-(Piperidin-1-yl)-5-(1-tosyl-1H-pyrrol-3-yl)pent-4-en-1-one (15c)**

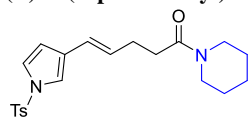

Pentane/ethyl acetate = 1/1, brown oil (42.5 mg, 55% yield).  $^1\text{H NMR}$  (300 MHz,  $\text{CDCl}_3$ )  $\delta$  7.50 (d,  $J$  = 8.4 Hz, 2H), 7.13 – 7.07 (m, 4H), 6.62 (d,  $J$  = 15.8 Hz, 1H), 6.03 (td,  $J$  = 3.4, 0.5 Hz, 1H), 5.83 (dt,  $J$  = 15.8, 6.6 Hz, 1H), 3.43 – 3.38 (m, 2H), 3.28 – 3.19 (m, 2H), 2.36 – 2.27 (m, 4H), 2.23 (s, 3H), 1.48 – 1.35 (m, 6H).  $^{13}\text{C NMR}$  (75 MHz,  $\text{CDCl}_3$ )  $\delta$  170.1, 144.8, 136.0, 133.7, 131.5, 129.8, 126.9, 122.4, 119.1, 112.1, 111.0, 46.5, 42.7, 32.6, 28.5, 26.5, 25.5, 24.5, 21.6. **HRMS** (ESI-TOF):  $m/z$  calcd. for  $\text{C}_{21}\text{H}_{27}\text{N}_2\text{O}_3\text{S}^+$  ( $[\text{M}+\text{H}]^+$ ) 387.1737, found 387.1736.

**(E)-1-(4-Methylpiperidin-1-yl)-5-phenylpent-4-en-1-one (16c)**

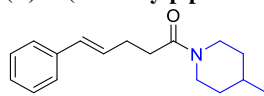

Pentane/ethyl acetate = 8/3, colorless oil (45.7 mg, 89% yield).  $^1\text{H NMR}$  (300 MHz,  $\text{CDCl}_3$ )  $\delta$  7.20 – 7.09 (m, 4H), 7.05 – 6.99 (m, 1H), 6.26 (d,  $J$  = 15.9 Hz, 1H), 6.10 (dt,  $J$  = 15.8, 6.5 Hz, 1H), 4.43 (ddd,  $J$  = 10.8, 4.0, 2.0 Hz, 1H), 3.79 – 3.46 (m, 1H), 2.81 (td,  $J$  = 13.2, 2.5 Hz, 1H), 2.43 – 2.28 (m, 5H), 1.53 – 1.39 (m, 3H), 0.98 – 0.82 (m, 2H), 0.76 (d,  $J$  = 6.4 Hz, 3H).  $^{13}\text{C NMR}$  (75 MHz,  $\text{CDCl}_3$ )  $\delta$  170.4, 137.5, 130.6, 129.6, 128.5, 127.0, 126.0, 46.0, 42.1, 34.7, 33.8, 33.1, 31.1, 28.9, 21.7. **HRMS** (ESI-TOF):  $m/z$  calcd. for  $\text{C}_{17}\text{H}_{24}\text{NO}^+$  ( $[\text{M}+\text{H}]^+$ ) 258.1852, found 258.1855.

**(E)-1-(3-Methylpiperidin-1-yl)-5-phenylpent-4-en-1-one (17c)**

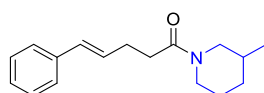

Pentane/ethyl acetate = 1/1, colorless oil (37.1 mg, 72% yield).  $^1\text{H NMR}$  (300 MHz,  $\text{CDCl}_3$ )  $\delta$  7.22 (dd,  $J$  = 8.4, 1.5 Hz, 2H), 7.16 (tt,  $J$  = 6.2, 1.4 Hz, 2H), 7.11 – 7.03 (m, 1H), 6.31 (d,  $J$  = 15.9 Hz, 1H), 6.14 (dt,  $J$  = 15.8, 6.5 Hz, 1H), 4.33 (d,  $J$  = 8.3 Hz, 1H), 3.67 – 3.51 (m, 1H), 3.05 – 2.56 (m, 1H), 2.57 – 2.33 (m, 5H), 1.72 – 1.25 (m, 5H), 0.78 (d,  $J$  = 6.6 Hz, 3H).  $^{13}\text{C NMR}$  (75 MHz,  $\text{CDCl}_3$ )  $\delta$  170.4, 137.5, 130.6, 129.6, 128.5, 127.0, 126.0, 53.2, 49.2, 33.1, 33.1, 28.8, 26.0, 24.8, 19.0. **HRMS** (ESI-TOF):  $m/z$  calcd. for  $\text{C}_{17}\text{H}_{24}\text{NO}^+$  ( $[\text{M}+\text{H}]^+$ ) 258.1852, found 258.1860.

**(E)-1-(2-Ethylpiperidin-1-yl)-5-phenylpent-4-en-1-one (18c)**

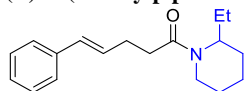

Pentane/ethyl acetate = 4/1, colorless oil (22.2 mg, 41% yield).  $^1\text{H NMR}$  (300 MHz,  $\text{CDCl}_3$ )  $\delta$  7.17 – 7.06 (m, 4H), 7.03 – 6.96 (m, 1H), 6.24 (d,  $J = 15.9$  Hz, 1H), 6.07 (dt,  $J = 15.9, 6.3$  Hz, 1H), 4.70 – 4.28 (m, 1H), 3.68 – 3.43 (m, 1H), 2.33 (dt,  $J = 12.5, 6.1$  Hz, 5H), 1.54 – 1.15 (m, 8H), 0.72 – 0.62 (m, 3H).  $^{13}\text{C NMR}$  (75 MHz,  $\text{CDCl}_3$ )  $\delta$  170.9, 137.5, 130.6, 129.6, 128.5, 127.0, 126.0, 54.5, 49.5, 29.0, 26.5, 26.4, 23.0, 22.3, 19.0, 10.7. HRMS (ESI-TOF):  $m/z$  calcd. for  $\text{C}_{18}\text{H}_{26}\text{NO}^+$  ( $[\text{M}+\text{H}]^+$ ) 272.2009, found 272.2010.

**(E)-1-(Azepan-1-yl)-5-phenylpent-4-en-1-one (19c)**

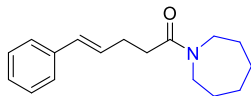

Pentane/ethyl acetate = 8/3, colorless oil (34.9 mg, 68% yield).  $^1\text{H NMR}$  (300 MHz,  $\text{CDCl}_3$ )  $\delta$  7.37 – 7.27 (m, 4H), 7.24 – 7.18 (m, 1H), 6.46 (d,  $J = 15.9$  Hz, 1H), 6.29 (dt,  $J = 15.8, 6.5$  Hz, 1H), 3.56 (t,  $J = 6.0$  Hz, 2H), 3.45 (t,  $J = 6.0$  Hz, 2H), 2.70 – 2.46 (m, 4H), 1.78 – 1.69 (m, 4H), 1.57 (dt,  $J = 5.9, 2.7$  Hz, 4H).  $^{13}\text{C NMR}$  (75 MHz,  $\text{CDCl}_3$ )  $\delta$  171.7, 137.5, 130.5, 129.6, 128.4, 126.9, 125.9, 47.8, 45.9, 32.9, 29.1, 28.7, 27.6, 27.0, 26.8. HRMS (ESI-TOF):  $m/z$  calcd. for  $\text{C}_{17}\text{H}_{24}\text{NO}^+$  ( $[\text{M}+\text{H}]^+$ ) 258.1852, found 258.1858.

**(E)-5-Phenyl-1-(1,4-dioxo-8-azaspiro[4.5]decan-8-yl)pent-4-en-1-one (20c)**

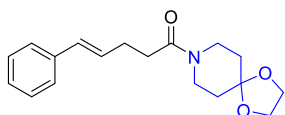

Pentane/ethyl acetate = 3/2, white solid (51.2 mg, 85% yield).  $^1\text{H NMR}$  (300 MHz,  $\text{CDCl}_3$ )  $\delta$  7.27 – 7.18 (m, 4H), 7.13 – 7.10 (m, 1H), 6.35 (d,  $J = 15.9$  Hz, 1H), 6.18 (dt,  $J = 15.8, 6.5$  Hz, 1H), 3.88 (s, 4H), 3.55 (d,  $J = 48.4$  Hz, 4H), 2.56 – 2.40 (m, 4H), 1.63 – 1.57 (m, 4H).  $^{13}\text{C NMR}$  (75 MHz,  $\text{CDCl}_3$ )  $\delta$  170.3, 137.3, 130.6, 129.2, 128.4, 126.9, 125.9, 106.8, 64.3, 43.4, 39.7, 35.5, 34.7, 32.9, 28.6. HRMS (ESI-TOF):  $m/z$  calcd. for  $\text{C}_{18}\text{H}_{24}\text{NO}_3^+$  ( $[\text{M}+\text{H}]^+$ ) 302.1751, found 302.1758.

**(E)-1-Morpholino-5-phenylpent-4-en-1-one (21c)**

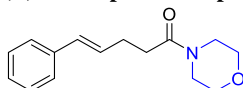

Pentane/ethyl acetate = 1/1, colorless oil (41.2 mg, 84% yield).  $^1\text{H NMR}$  (300 MHz,  $\text{CDCl}_3$ )  $\delta$  7.37 – 7.28 (m, 4H), 7.24 – 7.19 (m, 1H), 6.46 (d,  $J = 15.9$  Hz, 1H), 6.27 (dt,  $J = 15.8, 6.5$  Hz, 1H), 3.69 – 3.67 (m, 8H), 2.63 – 2.47 (m, 4H).  $^{13}\text{C NMR}$  (75 MHz,  $\text{CDCl}_3$ )  $\delta$  170.9, 137.4, 130.9, 129.1, 128.5, 127.2, 126.0, 66.9, 66.7, 46.0, 42.0, 32.8, 28.6. HRMS (ESI-TOF):  $m/z$  calcd. for  $\text{C}_{15}\text{H}_{20}\text{NO}_2^+$  ( $[\text{M}+\text{H}]^+$ ) 246.1489, found 246.1490.

**tert-Butyl (E)-4-(5-phenylpent-4-enoyl)piperazine-1-carboxylate (22c)**

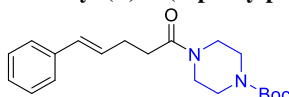

Pentane/ethyl acetate = 2/1, yellow solid (57.8 mg, 84% yield).  $^1\text{H NMR}$  (300 MHz,  $\text{CDCl}_3$ )  $\delta$  7.36 – 7.27 (m, 4H), 7.24 – 7.17 (m, 1H), 6.45 (d,  $J = 14.6$  Hz, 1H), 6.26 (dt,  $J = 15.8, 6.5$  Hz, 1H), 3.62 – 3.62 (m, 8H), 2.66 – 2.48 (m, 4H), 1.48 (s, 9H).  $^{13}\text{C NMR}$  (75 MHz,  $\text{CDCl}_3$ )  $\delta$  170.8, 154.6, 137.4, 130.9, 129.1, 128.5, 127.1, 126.0, 80.3, 45.3, 41.4, 33.0, 28.6, 28.4. HRMS (ESI-TOF):  $m/z$  calcd. for  $\text{C}_{20}\text{H}_{29}\text{N}_2\text{O}_3^+$  ( $[\text{M}+\text{H}]^+$ ) 345.2173, found 345.2186.

**(E)-1-(4-(Benzo[b]thiophen-7-yl)piperazin-1-yl)-5-phenylpent-4-en-1-one (23c)**

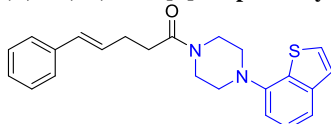

Pentane/ethyl acetate = 2/1, colorless oil (57.9 mg, 77% yield).  $^1\text{H NMR}$  (300 MHz,  $\text{CDCl}_3$ )  $\delta$  7.63 (d,  $J = 8.0$  Hz, 1H), 7.46 (s, 2H), 7.41 – 7.24 (m, 6H), 6.87 (dd,  $J = 7.7, 0.7$  Hz, 1H), 6.51 (d,  $J = 15.9$  Hz, 1H), 6.33 (dt,  $J = 15.8, 6.5$  Hz, 1H), 3.97 – 3.86 (m, 2H), 3.79 – 3.67 (m, 2H), 3.18 – 3.05 (m, 4H), 2.69 – 2.54 (m, 4H).  $^{13}\text{C NMR}$  (75 MHz,  $\text{CDCl}_3$ )  $\delta$  170.9, 147.7, 141.3, 137.5, 134.2, 130.9, 129.3, 128.6, 127.2, 126.1, 125.6, 125.0, 121.5, 117.8, 112.6, 52.3, 52.3, 46.0, 42.0, 33.0, 28.8. HRMS (ESI-TOF):  $m/z$  calcd. for  $\text{C}_{23}\text{H}_{25}\text{N}_2\text{OS}^+$  ( $[\text{M}+\text{H}]^+$ ) 377.1682, found 377.1684.

**(E)-1-(4-((4-Chlorophenyl)(phenyl)methyl)piperazin-1-yl)-5-phenylpent-4-en-1-one (24c)**

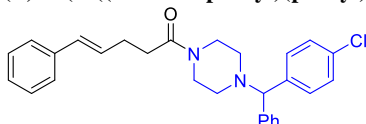

Pentane/ethyl acetate = 8/3, colorless oil (71.0 mg, 80% yield).  $^1\text{H NMR}$  (300 MHz,  $\text{CDCl}_3$ )  $\delta$  7.19–7.00 (m, 14H), 6.24 (d,  $J = 15.9$  Hz, 1H), 6.06 (dt,  $J = 15.8, 6.6$  Hz, 1H), 3.99 (s, 1H), 3.51–3.38 (m, 2H), 3.35–3.22 (m, 2H), 2.40–2.24 (m, 4H), 2.20–2.08 (m, 4H).  $^{13}\text{C NMR}$  (75 MHz,  $\text{CDCl}_3$ )  $\delta$  170.6, 141.6, 140.8, 137.5, 132.8, 130.8, 129.3, 129.1, 128.8, 128.8, 128.5, 127.8, 127.4, 127.1, 126.1, 75.3, 52.0, 51.6, 45.7, 41.8, 32.9, 28.8. HRMS (ESI-TOF):  $m/z$  calcd. for  $\text{C}_{28}\text{H}_{30}\text{ClN}_2\text{O}^+$  ( $[\text{M}+\text{H}]^+$ ) 445.2041, found 445.2054.

**(4*E*,4'*E*)-1,1'-(Piperazine-1,4-diyl)bis(5-phenylpent-4-en-1-one) (25c)**

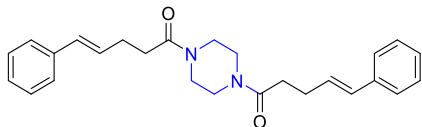

Ethyl acetate, white solid (18.1 mg, 45% yield).  $^1\text{H NMR}$  (300 MHz,  $\text{CDCl}_3$ )  $\delta$  7.28–7.18 (m, 8H), 7.18–7.09 (m, 2H), 6.37 (d,  $J = 15.9$  Hz, 2H), 6.18 (dt,  $J = 15.8, 6.6$  Hz, 2H), 3.57 (s, 4H), 3.41 (s, 4H), 2.55–2.34 (m, 8H).  $^{13}\text{C NMR}$  (75 MHz,  $\text{CDCl}_3$ )  $\delta$  171.1, 137.3, 131.0, 128.9, 128.6, 127.2, 126.0, 45.3, 41.6, 33.0, 28.5. HRMS (ESI-TOF):  $m/z$  calcd. for  $\text{C}_{26}\text{H}_{31}\text{N}_2\text{O}_2^+$  ( $[\text{M}+\text{H}]^+$ ) 403.2380, found 403.2375.

**(*E*)-*N*-Cyclohexyl-5-phenylpent-4-enamide (1d)**

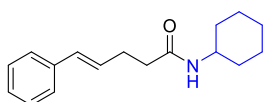

Ethyl acetate, white solid (37 mg, 72% yield).  $^1\text{H NMR}$  (300 MHz,  $\text{CDCl}_3$ )  $\delta$  7.32 (dd,  $J = 7.8, 1.2$  Hz, 4H), 7.22 (dt,  $J = 3.7, 2.3$  Hz, 1H), 6.46 (d,  $J = 15.9$  Hz, 1H), 6.23 (dt,  $J = 15.8, 6.8$  Hz, 1H), 5.42 (d,  $J = 5.5$  Hz, 1H), 3.85–3.77 (m, 1H), 2.61–2.54 (m, 2H), 2.36–2.31 (m, 2H), 1.92 (dd,  $J = 12.3, 3.6$  Hz, 2H), 1.69 (q,  $J = 4.3$  Hz, 3H), 1.45–1.36 (m, 2H), 1.18–1.09 (m, 3H).  $^{13}\text{C NMR}$  (101 MHz,  $\text{CDCl}_3$ )  $\delta$  171.2, 137.4, 131.0, 128.9, 128.5, 127.1, 126.0, 48.1, 36.6, 33.2, 29.2, 25.5, 24.8. HRMS (ESI-TOF):  $m/z$  calcd. for  $\text{C}_{17}\text{H}_{24}\text{NO}^+$  ( $[\text{M}+\text{H}]^+$ ) 258.1852, found 258.1860.

**(*E*)-*N*-Cyclohexyl-5-(4-fluorophenyl)pent-4-enamide (2d)**

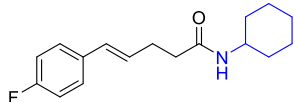

Pentane/ethyl acetate = 2/1, white solid (35.7 mg, 65% yield).  $^1\text{H NMR}$  (300 MHz,  $\text{CDCl}_3$ )  $\delta$  7.29–7.25 (m, 2H), 7.00–6.93 (m, 2H), 6.39 (d,  $J = 15.8$  Hz, 1H), 6.11 (dt,  $J = 15.8, 6.9$  Hz, 1H), 5.41 (d,  $J = 4.5$  Hz, 1H), 3.83–3.70 (m, 1H), 2.57–2.49 (m, 2H), 2.33–2.27 (m, 2H), 1.98–1.86 (m, 2H), 1.71–1.59 (m, 3H), 1.29–1.21 (m, 2H), 1.16–1.02 (m, 3H).  $^{13}\text{C NMR}$  (75 MHz,  $\text{CDCl}_3$ )  $\delta$  171.1, 133.56 (d,  $J = 3.4$  Hz), 162.04 (d,  $J = 246.0$  Hz), 128.60 (d,  $J = 2.0$  Hz), 127.45 (d,  $J = 8.0$  Hz), 127.4, 115.37 (d,  $J = 21.6$  Hz), 48.2, 36.5, 33.2, 29.1, 25.5, 24.8.  $^{19}\text{F NMR}$  (282 MHz,  $\text{CDCl}_3$ )  $\delta$  -115.31. HRMS (ESI-TOF):  $m/z$  calcd. for  $\text{C}_{17}\text{H}_{23}\text{FNO}^+$  ( $[\text{M}+\text{H}]^+$ ) 276.1758, found 276.1761.

**(*E*)-5-(4-Chlorophenyl)-*N*-cyclohexylpent-4-enamide (3d)**

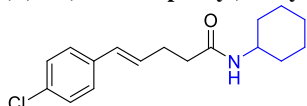

Pentane/ethyl acetate = 2/1, white solid (44.8 mg, 77% yield).  $^1\text{H NMR}$  (300 MHz,  $\text{CDCl}_3$ )  $\delta$  7.23 (s, 4H), 6.37 (dt,  $J = 15.8, 1.3$  Hz, 1H), 6.17 (dt,  $J = 15.8, 6.8$  Hz, 1H), 5.47 (d,  $J = 6.5$  Hz, 1H), 3.83–3.71 (m, 1H), 2.58–2.47 (m, 2H), 2.34–2.23 (m, 2H), 1.92–1.82 (m, 2H), 1.71–1.56 (m, 3H), 1.41–1.32 (m, 2H), 1.18–1.02 (m, 3H).  $^{13}\text{C NMR}$  (75 MHz,  $\text{CDCl}_3$ )  $\delta$  171.0, 135.9, 132.7, 129.8, 129.6, 128.6, 127.2, 48.2, 36.4, 33.2, 29.1, 25.5, 24.9. HRMS (ESI-TOF):  $m/z$  calcd. for  $\text{C}_{17}\text{H}_{23}\text{ClNO}^+$  ( $[\text{M}+\text{H}]^+$ ) 292.1463, found 292.1471.

**(*E*)-*N*-Cyclohexyl-5-(4-(trifluoromethyl)phenyl)pent-4-enamide (4d)**

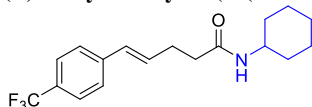

Pentane/ethyl acetate = 1/1, white solid (40.3 mg, 62% yield).  $^1\text{H NMR}$  (300 MHz,  $\text{CDCl}_3$ )  $\delta$  7.45 (d,  $J = 8.2$  Hz, 2H), 7.33 (d,  $J = 8.1$  Hz, 2H), 6.39 (d,  $J = 15.9$  Hz, 1H), 6.24 (dt,  $J = 15.8, 6.6$  Hz, 1H), 5.42 (d,  $J = 6.1$  Hz, 1H), 3.77–3.63 (m, 1H), 2.51 (q,  $J = 7.3$  Hz, 2H), 2.26 (t,  $J = 7.4$  Hz, 2H), 1.82 (dd,  $J = 12.4, 3.4$  Hz, 2H), 1.65–1.50 (m, 3H), 1.37–1.17 (m, 2H), 1.10–0.98 (m, 3H).  $^{13}\text{C NMR}$  (75 MHz,  $\text{CDCl}_3$ )  $\delta$  171.9, 140.8, 131.7, 129.7, 128.9 (q,  $J = 32.5$  Hz), 126.1, 125.4 (q,  $J = 3.8$  Hz), 48.2, 36.2, 33.2, 29.0, 25.4, 24.8.  $^{19}\text{F NMR}$  (282 MHz,  $\text{CDCl}_3$ )  $\delta$  -62.43. HRMS (ESI-TOF):  $m/z$  calcd. for  $\text{C}_{18}\text{H}_{23}\text{F}_3\text{NO}^+$  ( $[\text{M}+\text{H}]^+$ ) 326.1726, found 326.1733.

**(E)-N-Cyclohexyl-5-(4-((trifluoromethyl)thio)phenyl)pent-4-enamide (5d)**

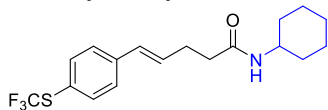

Pentane/ethyl acetate = 1/1, white solid (44.9 mg, 63% yield).  $^1\text{H NMR}$  (300 MHz,  $\text{CDCl}_3$ )  $\delta$  7.55 (d,  $J$  = 8.3 Hz, 2H), 7.37 – 7.32 (m, 2H), 6.43 (d,  $J$  = 15.9 Hz, 1H), 6.30 (dt,  $J$  = 15.8, 6.6 Hz, 1H), 5.53 (d,  $J$  = 6.9 Hz, 1H), 3.83 – 3.70 (m, 1H), 2.61 – 2.52 (m, 2H), 2.32 (t,  $J$  = 7.4 Hz, 2H), 1.92 – 1.84 (m, 2H), 1.80 – 1.43 (m, 4H), 1.37 – 1.28 (m, 2H), 1.15 – 1.08 (m, 2H).  $^{13}\text{C NMR}$  (75 MHz,  $\text{CDCl}_3$ )  $\delta$  170.9, 140.1, 136.6, 131.7, 129.7, 129.6 (q,  $J$  = 301.2 Hz), 126.9, 122.4 (q,  $J$  = 2.26 Hz), 48.3, 36.2, 33.2, 29.1, 25.5, 24.8.  $^{19}\text{F NMR}$  (282 MHz,  $\text{CDCl}_3$ )  $\delta$  -42.95. HRMS (ESI-TOF):  $m/z$  calcd. for  $\text{C}_{18}\text{H}_{23}\text{F}_3\text{NOS}^+$  ( $[\text{M}+\text{H}]^+$ ) 358.1447, found 358.1455.

**(E)-N-Cyclohexyl-5-(*o*-tolyl)pent-4-enamide (6d)**

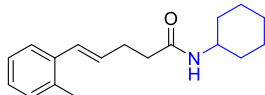

Pentane/ethyl acetate = 2/1, white solid (35.7 mg, 66% yield).  $^1\text{H NMR}$  (300 MHz,  $\text{CDCl}_3$ )  $\delta$  7.40 – 7.35 (m, 1H), 7.16 – 7.08 (m, 3H), 6.63 (d,  $J$  = 15.7 Hz, 1H), 6.07 (dt,  $J$  = 15.7, 6.9 Hz, 1H), 5.42 (d,  $J$  = 6.8 Hz, 1H), 3.85 – 3.72 (m, 1H), 2.63 – 2.51 (m, 2H), 2.32 (s, 5H), 1.95 – 1.85 (m, 2H), 1.73 – 1.59 (m, 3H), 1.43 – 1.33 (m, 2H), 1.19 – 0.95 (m, 3H).  $^{13}\text{C NMR}$  (75 MHz,  $\text{CDCl}_3$ )  $\delta$  171.2, 136.5, 135.0, 130.2, 130.2, 128.8, 127.1, 126.0, 125.5, 48.2, 36.8, 33.3, 29.5, 25.5, 24.9, 19.8. HRMS (ESI-TOF):  $m/z$  calcd. for  $\text{C}_{18}\text{H}_{26}\text{NO}^+$  ( $[\text{M}+\text{H}]^+$ ) 272.2009, found 272.2015.

**(E)-N-Cyclohexyl-5-(3-fluorophenyl)pent-4-enamide (7d)**

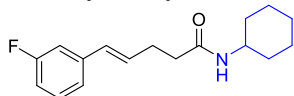

Pentane/ethyl acetate = 2/1, white solid (33.5 mg, 61% yield).  $^1\text{H NMR}$  (300 MHz,  $\text{CDCl}_3$ )  $\delta$  7.25 – 7.19 (m, 1H), 7.08 – 6.98 (m, 2H), 6.88 (tdd,  $J$  = 8.5, 2.6, 1.0 Hz, 1H), 6.39 (d,  $J$  = 16.1 Hz, 1H), 6.29 – 6.09 (m, 1H), 5.46 (d,  $J$  = 6.8 Hz, 1H), 3.84 – 3.70 (m, 1H), 2.58 – 2.50 (m, 2H), 2.30 (t,  $J$  = 7.5 Hz, 2H), 1.89 (dd,  $J$  = 12.4, 3.5 Hz, 2H), 1.71 – 1.56 (m, 3H), 1.42 – 1.32 (m, 2H), 1.17 – 1.00 (m, 3H).  $^{13}\text{C NMR}$  (75 MHz,  $\text{CDCl}_3$ )  $\delta$  171.0, 163.1 (d,  $J$  = 245.0 Hz), 139.8 (d,  $J$  = 7.9 Hz), 130.4, 130.0 (d,  $J$  = 1.9 Hz), 129.9 (d,  $J$  = 3.9 Hz), 121.9 (d,  $J$  = 2.7 Hz), 113.9 (d,  $J$  = 21.4 Hz), 112.4 (d,  $J$  = 21.7 Hz), 48.2, 36.4, 33.2, 29.0, 25.5, 24.9.  $^{19}\text{F NMR}$  (282 MHz,  $\text{CDCl}_3$ )  $\delta$  -113.76. HRMS (ESI-TOF):  $m/z$  calcd. for  $\text{C}_{17}\text{H}_{23}\text{FNO}^+$  ( $[\text{M}+\text{H}]^+$ ) 276.1758, found 276.1760.

**(E)-N-Cyclohexyl-5-(3,5-dimethoxyphenyl)pent-4-enamide (8d)**

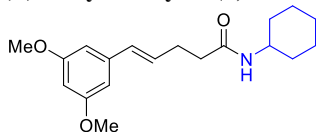

Pentane/ethyl acetate = 1/1, white solid (34.9 mg, 55% yield).  $^1\text{H NMR}$  (300 MHz,  $\text{CDCl}_3$ )  $\delta$  6.56 – 6.43 (m, 2H), 6.42 – 6.27 (m, 2H), 6.18 (dt,  $J$  = 15.8, 6.8 Hz, 1H), 5.48 (d,  $J$  = 7.7 Hz, 1H), 3.77 (s, 6H), 3.79 – 3.73 (m, 1H), 2.59 – 2.42 (m, 2H), 2.40 – 2.06 (m, 2H), 1.97 – 1.79 (m, 2H), 1.71 – 1.55 (m, 3H), 1.38 – 1.28 (m, 2H), 1.20 – 0.99 (m, 3H).  $^{13}\text{C NMR}$  (75 MHz,  $\text{CDCl}_3$ )  $\delta$  171.2, 160.9, 139.5, 131.0, 129.5, 104.1, 99.5, 55.3, 48.2, 36.5, 33.2, 29.0, 25.5, 24.9. HRMS (ESI-TOF):  $m/z$  calcd. for  $\text{C}_{19}\text{H}_{28}\text{NO}_3^+$  ( $[\text{M}+\text{H}]^+$ ) 318.2064, found 318.2068.

**(E)-N-Cyclododecyl-5-phenylpent-4-enamide (9d)**

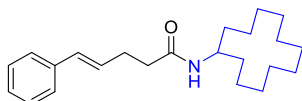

Pentane/ethyl acetate = 4/1, white solid (46.4 mg, 68% yield).  $^1\text{H NMR}$  (300 MHz,  $\text{CDCl}_3$ )  $\delta$  7.27 – 7.18 (m, 4H), 7.16 – 7.04 (m, 1H), 6.36 (d,  $J$  = 15.8 Hz, 1H), 6.13 (dt,  $J$  = 15.8, 6.8 Hz, 1H), 5.26 (d,  $J$  = 8.3 Hz, 1H), 4.04 – 3.96 (m, 1H), 2.52 – 2.42 (m, 2H), 2.23 (t,  $J$  = 7.4 Hz, 2H), 1.38 – 1.18 (m, 22H).  $^{13}\text{C NMR}$  (75 MHz,  $\text{CDCl}_3$ )  $\delta$  171.3, 137.4, 131.0, 128.9, 128.5, 127.1, 126.0, 46.1, 36.6, 30.3, 29.1, 24.0, 23.8, 23.5, 23.3, 21.4. HRMS (ESI-TOF):  $m/z$  calcd. for  $\text{C}_{23}\text{H}_{36}\text{NO}^+$  ( $[\text{M}+\text{H}]^+$ ) 342.2791, found 342.2800.

**(E)-N-(5-Methylhexan-2-yl)-5-phenylpent-4-enamide (10d)**

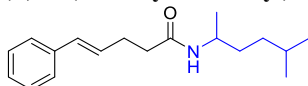

Pentane/ethyl acetate = 3/1, white solid (43.7 mg, 69% yield).  $^1\text{H NMR}$  (300 MHz,  $\text{CDCl}_3$ )  $\delta$  7.14–7.08 (m, 4H), 7.04–7.01 (m, 1H), 6.26 (d,  $J$  = 15.8 Hz, 1H), 6.04 (dt,  $J$  = 15.8, 6.8 Hz, 1H), 5.28 (s, 1H), 3.84–3.75 (m, 1H), 2.43–2.33 (m, 2H), 2.19–2.09 (m, 2H), 1.37–1.16 (m, 4H), 1.02–0.99 (m, 1H), 0.93 (d,  $J$  = 6.6 Hz, 3H), 0.67 (d,  $J$  = 6.6 Hz, 6H).  $^{13}\text{C NMR}$  (75 MHz,  $\text{CDCl}_3$ )  $\delta$  171.4, 137.4, 131.0, 128.9, 128.5, 127.1, 126.0, 45.4, 36.6, 35.1, 34.8, 29.2, 28.0, 22.6, 21.1. HRMS (ESI-TOF):  $m/z$  calcd. for  $\text{C}_{18}\text{H}_{28}\text{NO}^+$  ( $[\text{M}+\text{H}]^+$ ) 274.2165, found 274.2167.

**(E)-N-((1R,2S,5S)-Adamantan-2-yl)-5-phenylpent-4-enamide (11d)**

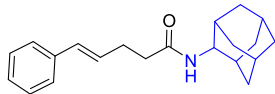

Pentane/ethyl acetate = 2/1, colorless oil (50.6 mg, 82% yield).  $^1\text{H NMR}$  (300 MHz,  $\text{CDCl}_3$ )  $\delta$  7.12–7.04 (m, 4H), 7.01–6.97 (m, 1H), 6.24 (d,  $J$  = 15.8 Hz, 1H), 6.01 (dt,  $J$  = 15.8, 6.8 Hz, 1H), 5.73 (d,  $J$  = 7.5 Hz, 1H), 3.86 (d,  $J$  = 8.0 Hz, 1H), 2.35 (q,  $J$  = 7.1 Hz, 2H), 2.20–2.14 (m, 2H), 1.68–1.38 (m, 14H).  $^{13}\text{C NMR}$  (75 MHz,  $\text{CDCl}_3$ )  $\delta$  171.3, 137.3, 131.1, 128.9, 128.5, 127.2, 126.0, 53.2, 37.5, 37.1, 36.6, 31.9, 29.3, 27.2, 27.1, 26.9. HRMS (ESI-TOF):  $m/z$  calcd. for  $\text{C}_{21}\text{H}_{28}\text{NO}^+$  ( $[\text{M}+\text{H}]^+$ ) 310.2165, found 310.2169.

**(E)-5-Phenyl-N-(tetrahydro-2H-thiopyran-4-yl)pent-4-enamide (12d)**

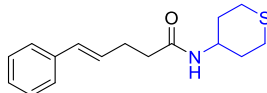

Pentane/ethyl acetate = 3/2, white solid (22.6 mg, 41% yield).  $^1\text{H NMR}$  (300 MHz,  $\text{CDCl}_3$ )  $\delta$  7.24–7.14 (m, 5H), 6.36 (d,  $J$  = 15.8 Hz, 1H), 6.12 (dt,  $J$  = 15.8, 6.8 Hz, 1H), 5.46 (d,  $J$  = 8.0 Hz, 1H), 3.80–3.68 (m, 1H), 2.67–2.43 (m, 6H), 2.28–2.21 (m, 2H), 2.11–2.03 (m, 2H), 1.52–1.39 (m, 2H).  $^{13}\text{C NMR}$  (75 MHz,  $\text{CDCl}_3$ )  $\delta$  171.2, 137.3, 131.1, 128.6, 128.6, 127.2, 126.0, 47.4, 36.5, 34.0, 29.1, 27.9. HRMS (ESI-TOF):  $m/z$  calcd. for  $\text{C}_{26}\text{H}_{22}\text{NOS}^+$  ( $[\text{M}+\text{H}]^+$ ) 276.1417, found 276.1416.

**(E)-N-(tert-Butyl)-5-phenylpent-4-enamide (13d)**

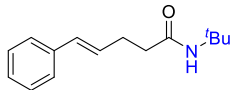

Pentane/ethyl acetate = 4/1, white solid (31.4 mg, 68% yield).  $^1\text{H NMR}$  (300 MHz,  $\text{CDCl}_3$ )  $\delta$  7.27–7.18 (m, 4H), 7.17–7.03 (m, 1H), 6.35 (d,  $J$  = 15.8 Hz, 1H), 6.12 (dt,  $J$  = 15.8, 6.9 Hz, 1H), 5.29 (s, 1H), 2.50–2.39 (m, 2H), 2.17 (t,  $J$  = 7.4 Hz, 2H), 1.26 (s, 9H).  $^{13}\text{C NMR}$  (75 MHz,  $\text{CDCl}_3$ )  $\delta$  171.4, 137.4, 130.9, 128.9, 128.5, 127.0, 125.9, 51.1, 37.2, 29.0, 28.8. HRMS (ESI-TOF):  $m/z$  calcd. for  $\text{C}_{15}\text{H}_{22}\text{NO}^+$  ( $[\text{M}+\text{H}]^+$ ) 232.1696, found 232.1705.

**(E)-N-((3S,5S,8R,9S,10S,13R,14S,17R)-10,13-dimethyl-17-((R)-6-methylheptan-2-yl)hexadecahydro-1H-cyclopenta[a]phenanthren-3-yl)-5-phenylpent-4-enamide (14d)**

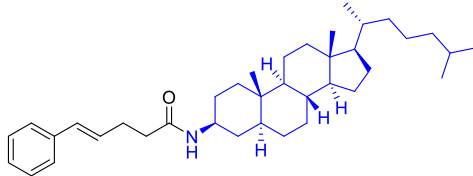

Pentane/ethyl acetate = 2/1, white solid (38.2 mg, 35% yield).  $^1\text{H NMR}$  (300 MHz,  $\text{CDCl}_3$ )  $\delta$  7.26–7.18 (m, 4H), 7.15–7.08 (m, 1H), 6.35 (d,  $J$  = 15.8 Hz, 1H), 6.13 (dt,  $J$  = 15.8, 6.8 Hz, 1H), 5.37 (d,  $J$  = 8.1 Hz, 1H), 3.94–3.48 (m, 1H), 2.57–2.41 (m, 2H), 2.23 (t,  $J$  = 7.3 Hz, 2H), 1.88 (dt,  $J$  = 12.2, 3.1 Hz, 1H), 1.72 (dd,  $J$  = 9.2, 3.5 Hz, 2H), 1.66–1.35 (m, 7H), 1.27–0.91 (m, 21H), 0.82 (d,  $J$  = 6.5 Hz, 3H), 0.80 (d,  $J$  = 1.4 Hz, 3H), 0.78 (d,  $J$  = 1.3 Hz, 3H), 0.68 (s, 3H), 0.57 (s, 3H).  $^{13}\text{C NMR}$  (75 MHz,  $\text{CDCl}_3$ )  $\delta$  171.3, 137.4, 131.0, 128.8, 128.5, 127.1, 126.0, 56.4, 56.3, 54.2, 49.0, 45.3, 42.6, 40.0, 39.5, 37.4, 36.6, 36.2, 35.8, 35.5, 35.4, 32.0, 29.2, 28.9, 28.6, 28.3, 28.0, 24.2, 23.9, 22.8, 22.6, 21.1, 18.7, 12.2, 12.1. HRMS (ESI-TOF):  $m/z$  calcd. for  $\text{C}_{38}\text{H}_{60}\text{NO}^+$  ( $[\text{M}+\text{H}]^+$ ) 546.4669, found 546.4681.

## 5. References

- [1] Medina, J. M.; Kang, T.; Erbay, T. G.; Shao, H.; Gallego, G. M.; Yang, S.; Tran-Dube M.; Richardson P. F.; Derosa J.; Helsen, R. T.; Patman R. L.; Wang F.; Ashcroft C, P.; Braganza J. F.; McAlpine I.; Liu P.; Engle K. M. Cu-Catalyzed Hydroboration of Benzylidene cyclopropanes: Reaction Optimization, (Hetero) Aryl Scope, and Origins of Pathway Selectivity. *ACS Catal.* **2019**, *9*, 11130-11136.
- [2] Yuan, Y.; Wu, F.-P.; Schünemann, C.; Holz, J.; Kamer, P. C.; Wu, X.-F. Copper-Catalyzed Carbonylative Hydroamidation of Styrenes to Branched Amides. *Angew. Chem. Int. Ed.* **2020**, *59*, 22441-22445.
- [3] Yuan, Y.; Zhao, F.; Wu, X.-F. Copper-Catalyzed Enantioselective Carbonylation toward  $\alpha$ -Chiral Secondary Amides. *Chem. Sci.*, **2021**, *12*, 12676-12681.

## 6. NMR spectra

211109.413.10.fid — Huiqing Geng GHQ-H-41 — Au1H CDD3 {C}Bruker(TopSpin3.5pl6) 2111 13 — 400.13MHz

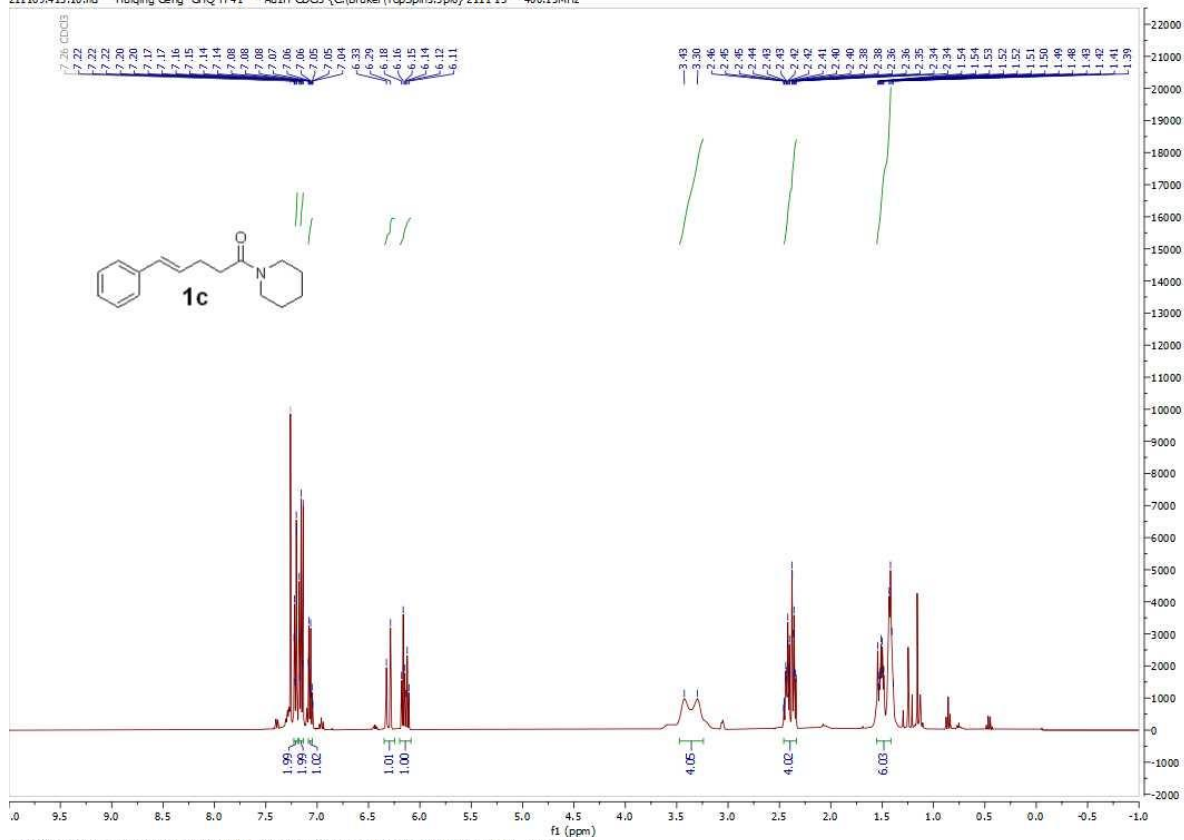

211109.413.11.fid — Huiqing Geng GHQ-H-41 — Au13C CDD3 {C}Bruker(TopSpin3.5pl6) 2111 13 — 100.63MHz

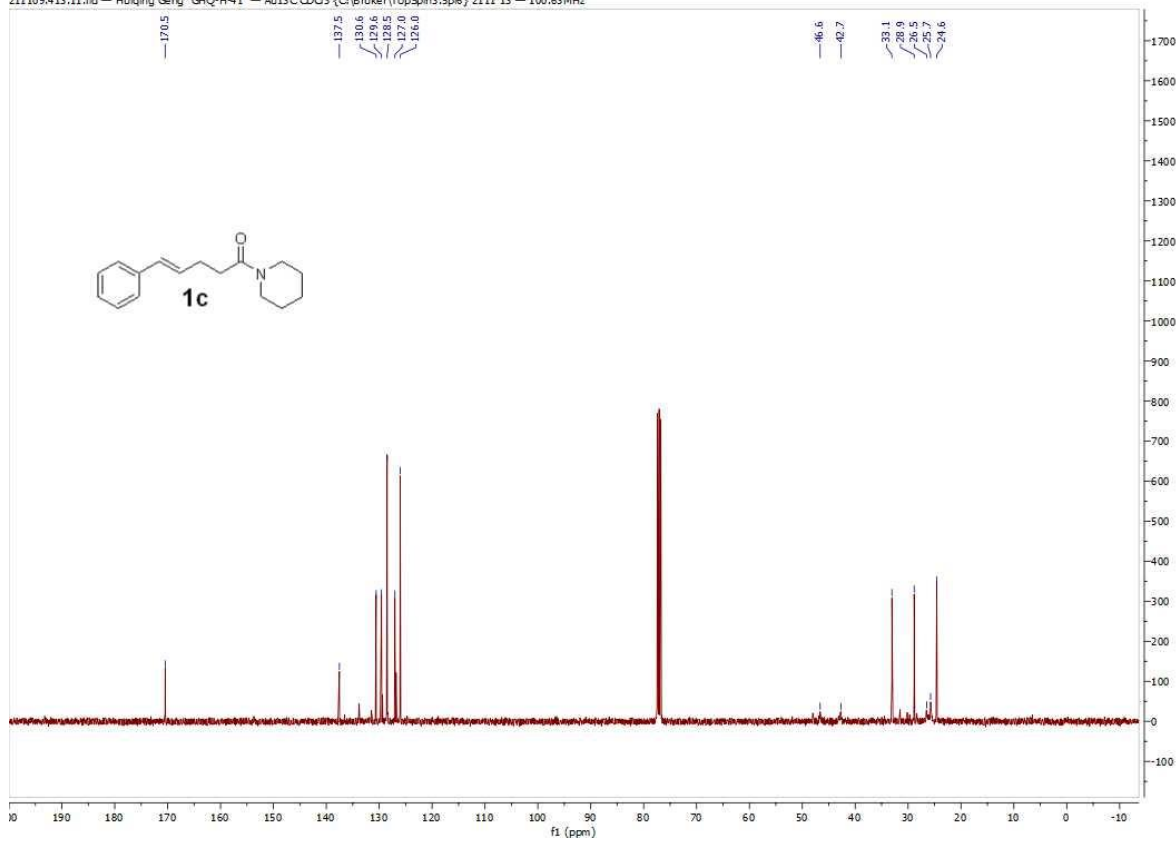

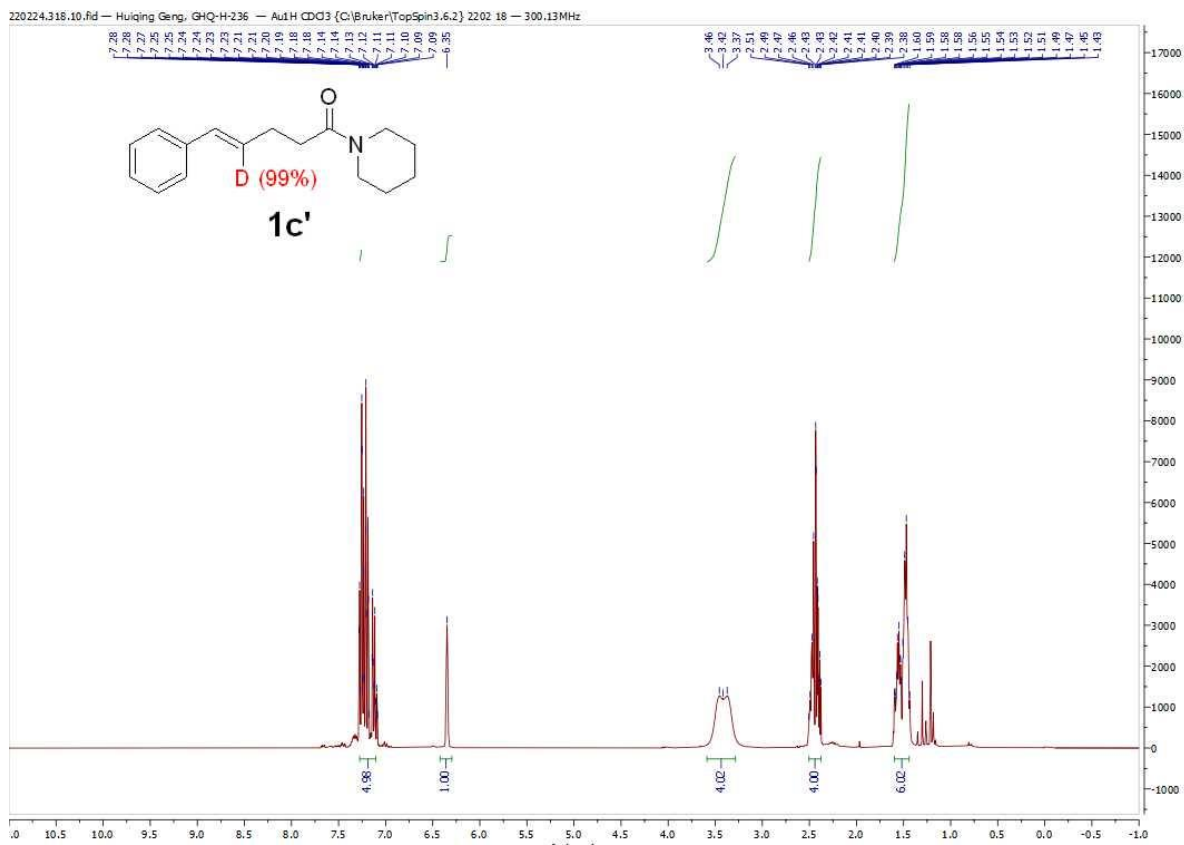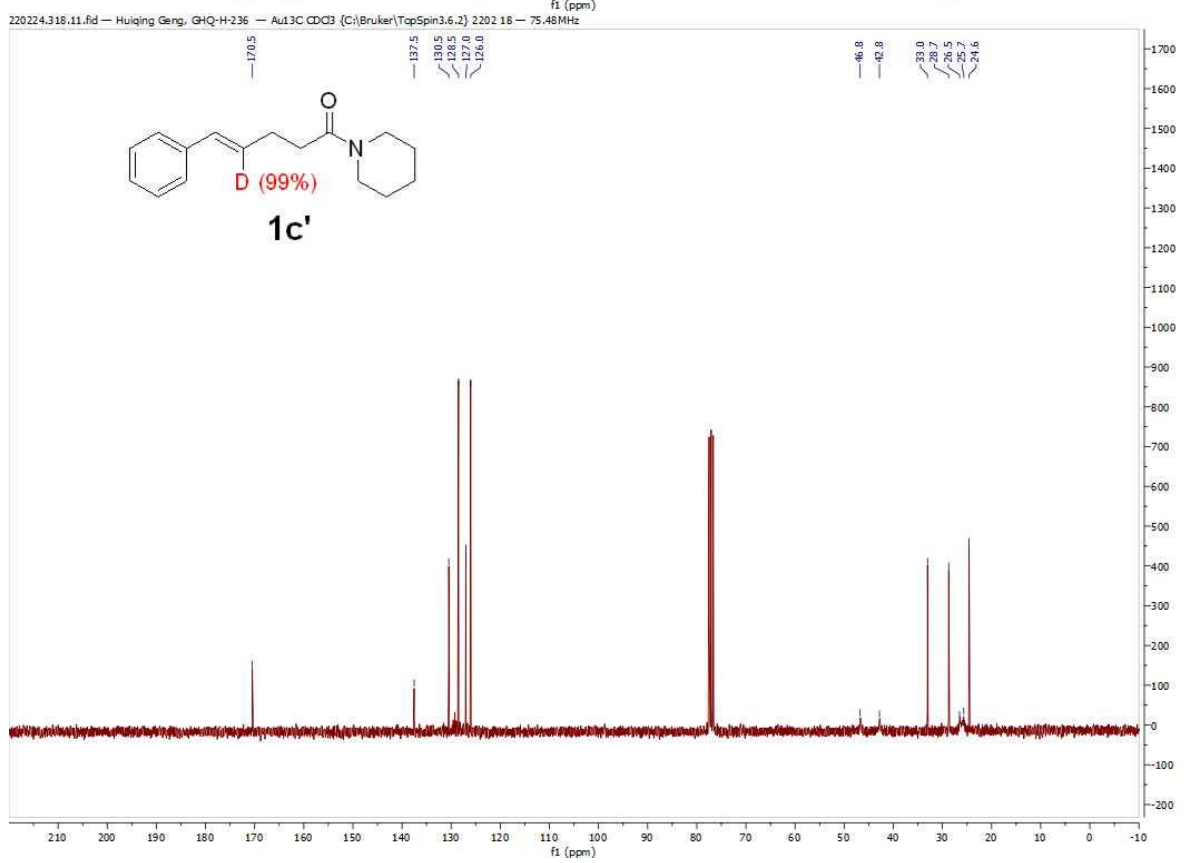



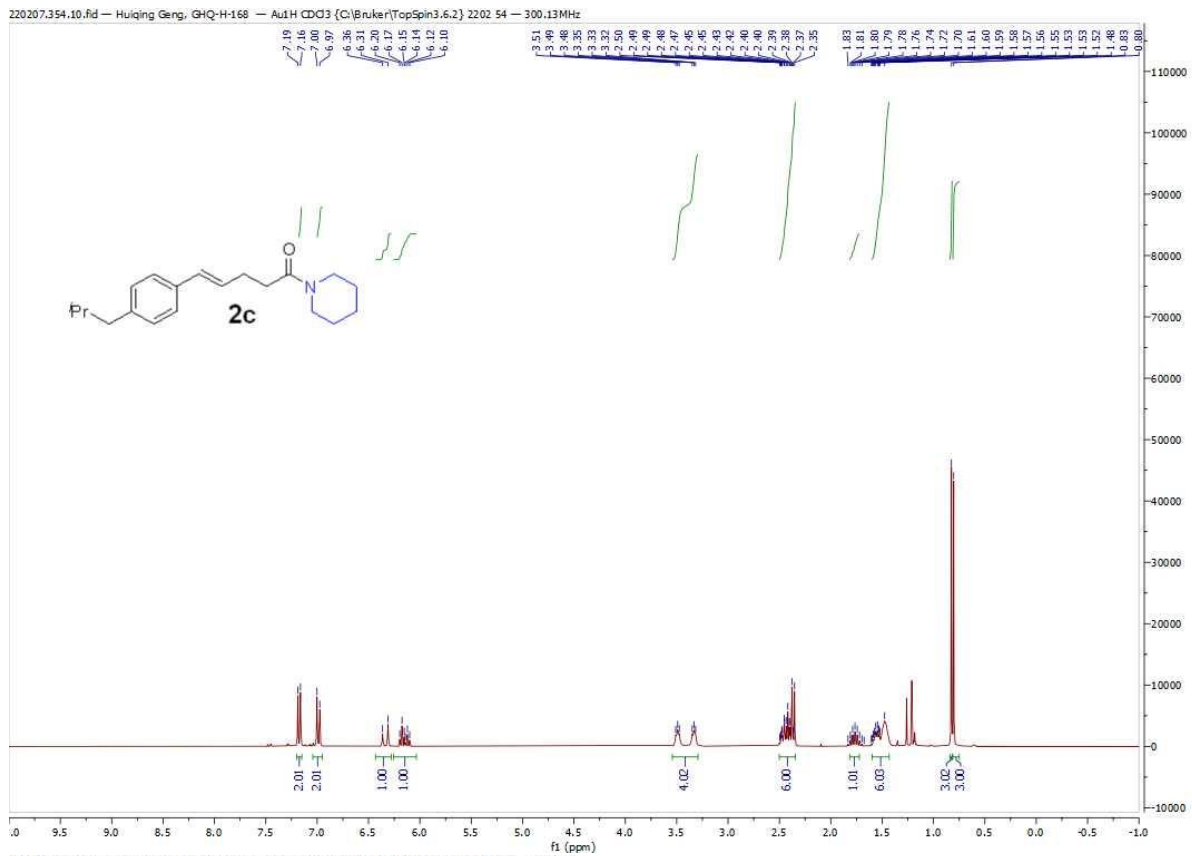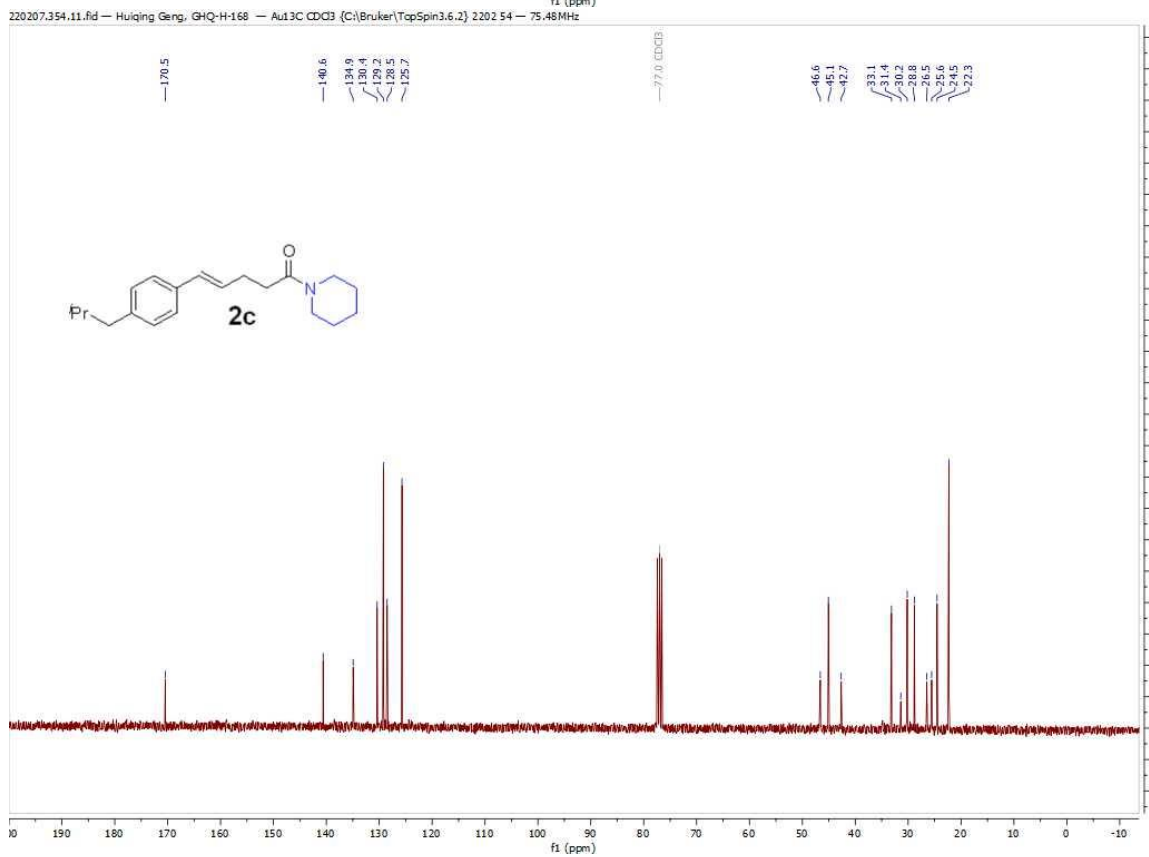



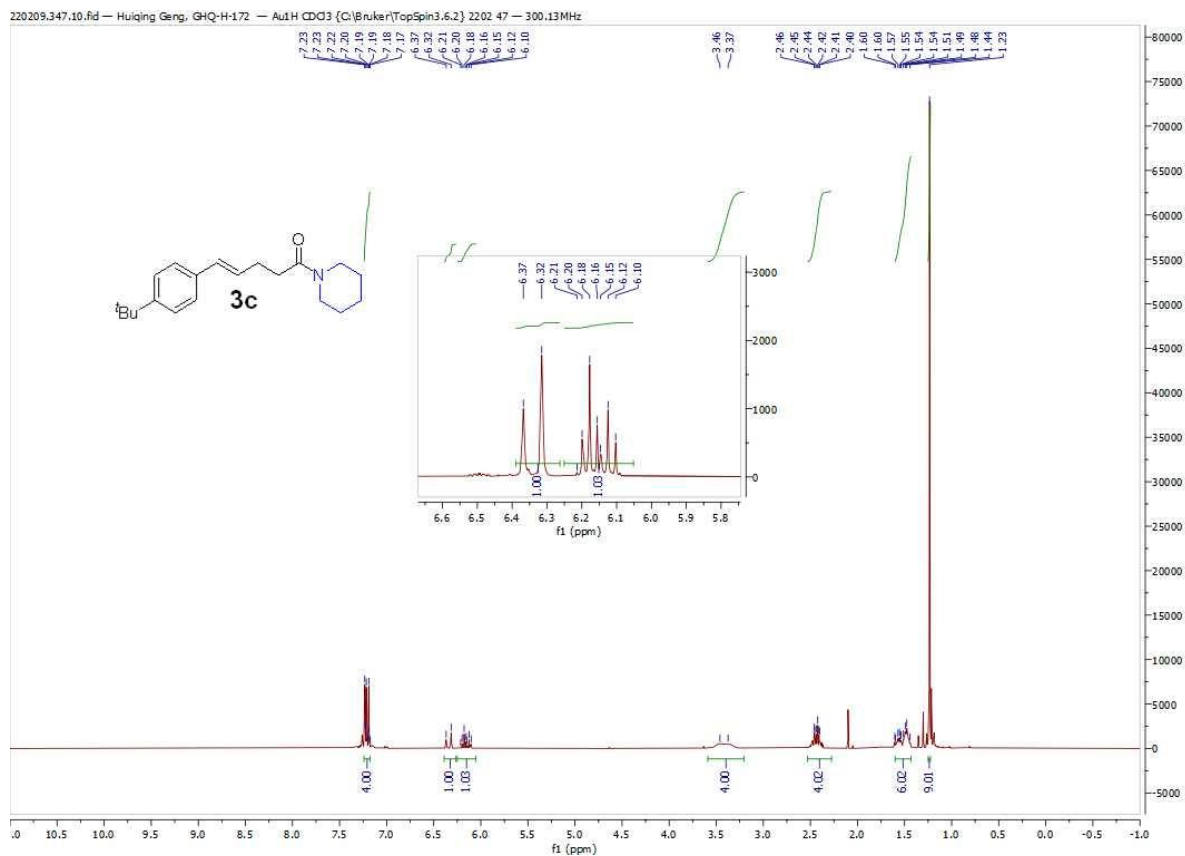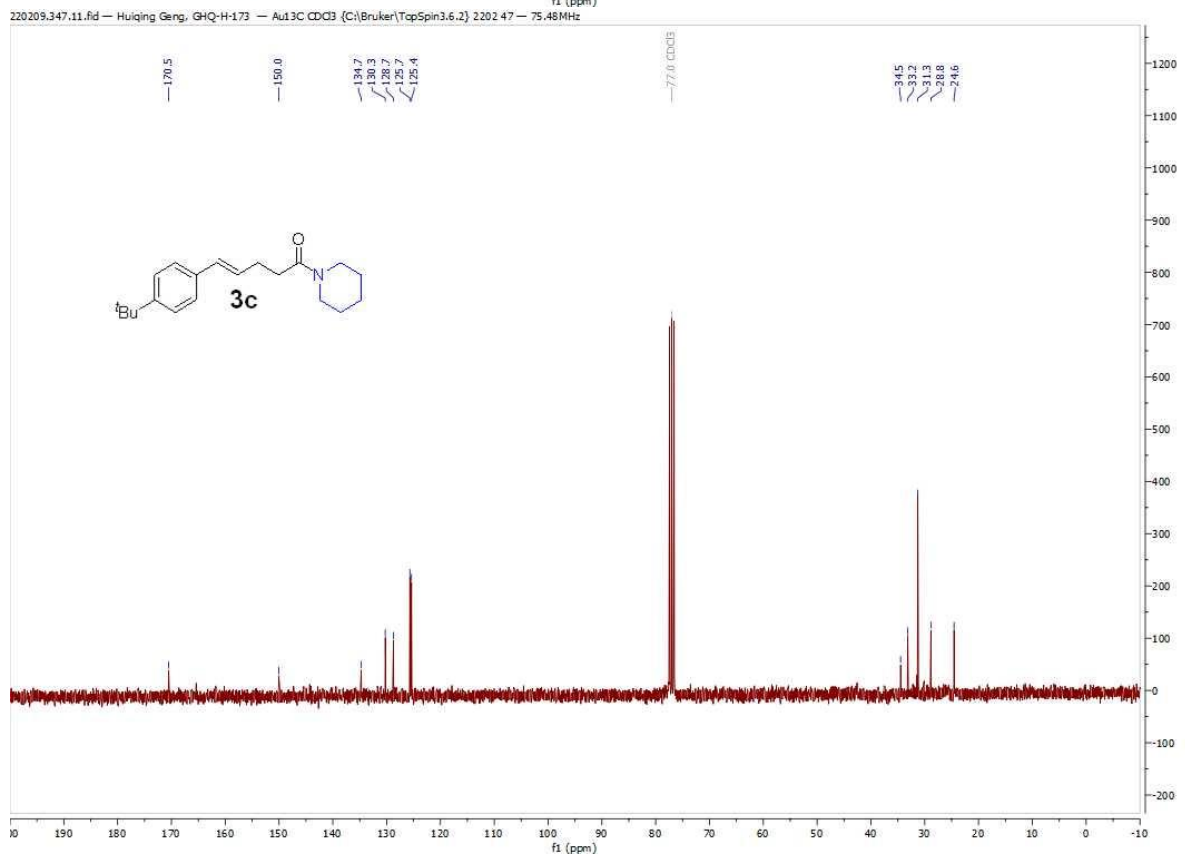

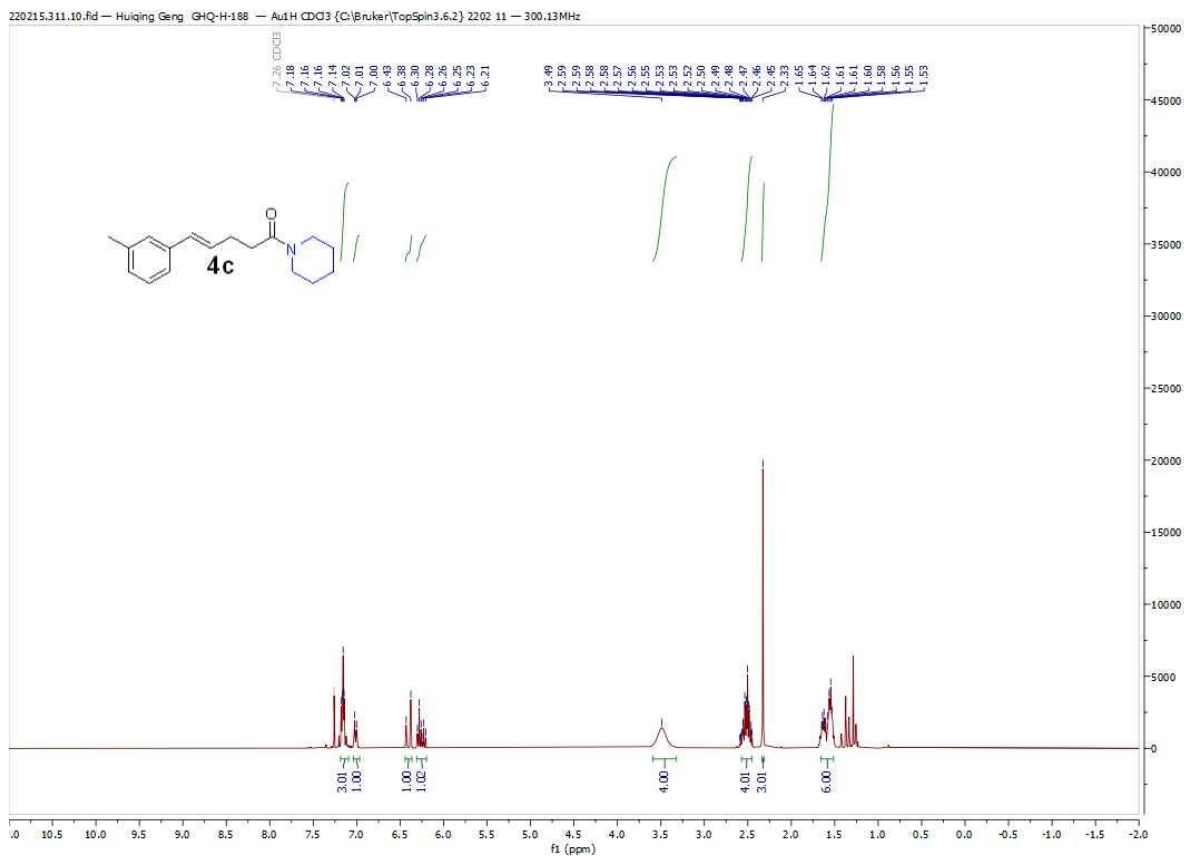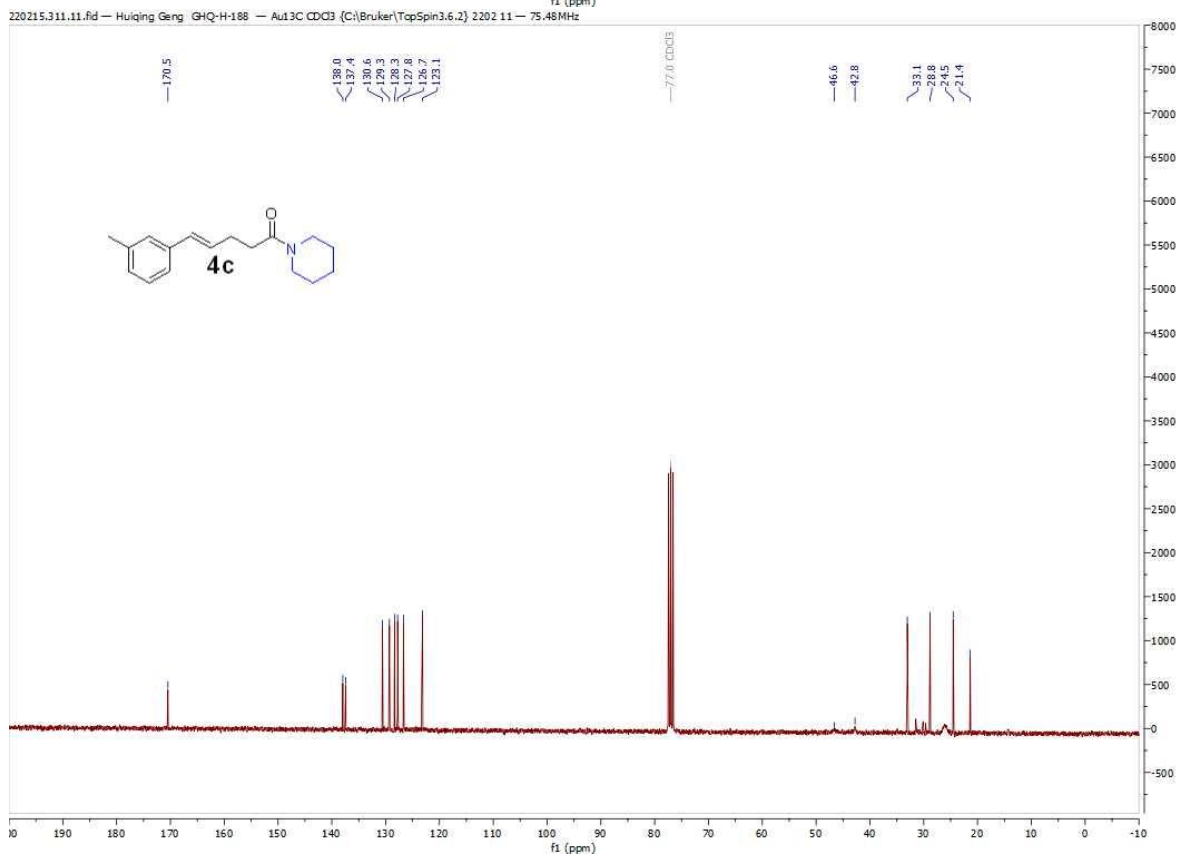

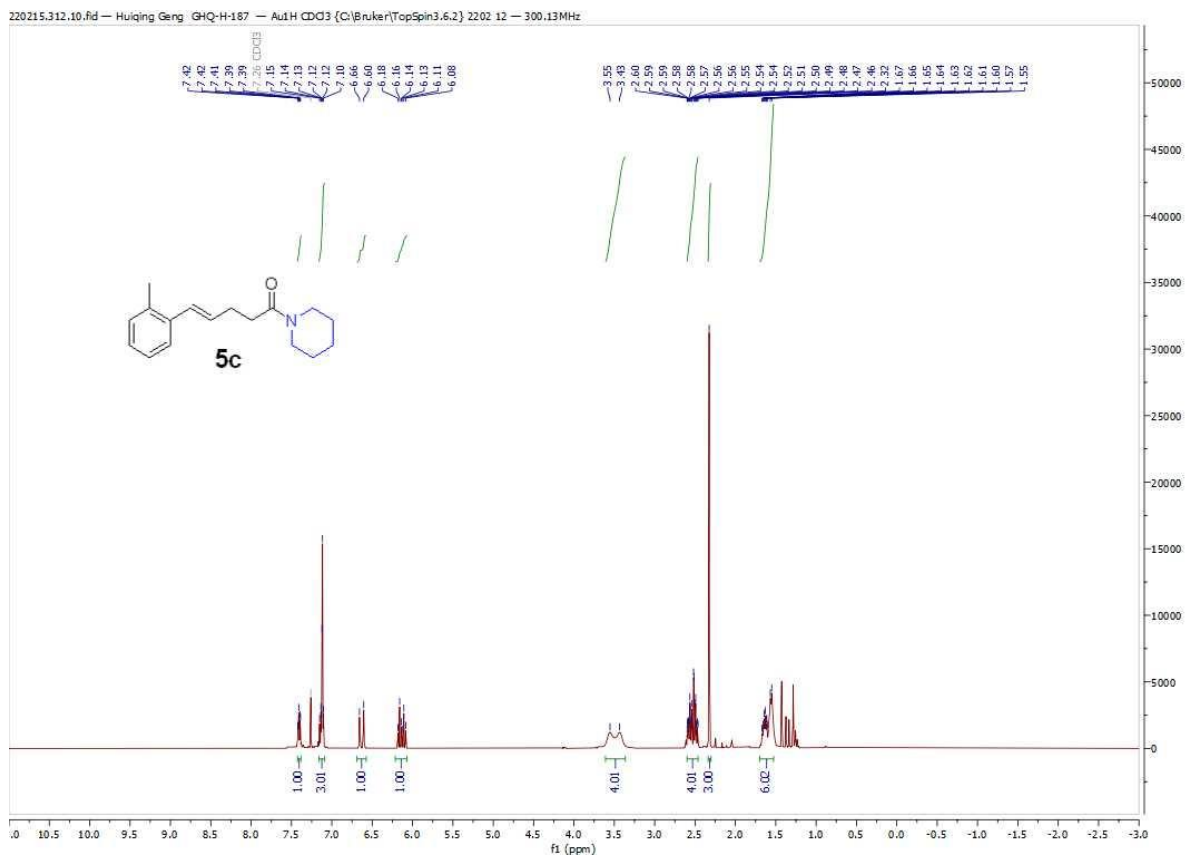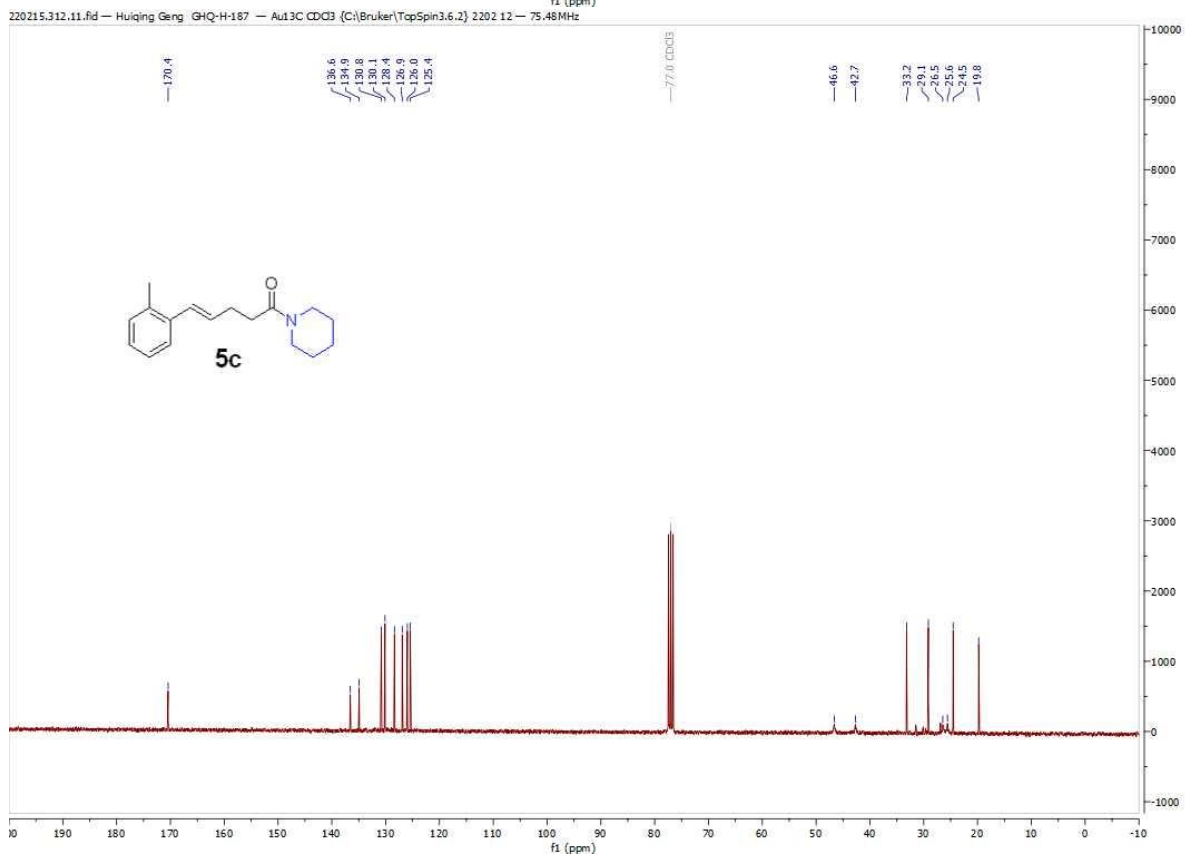

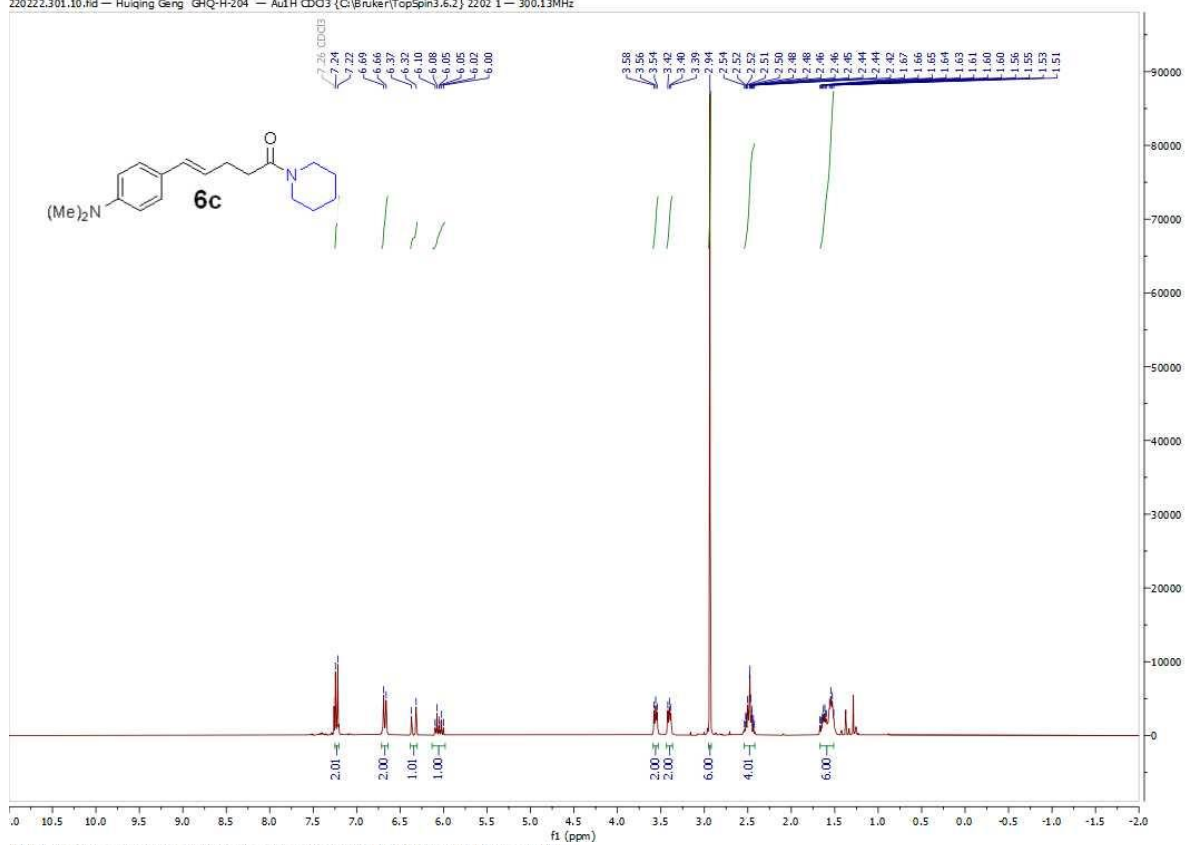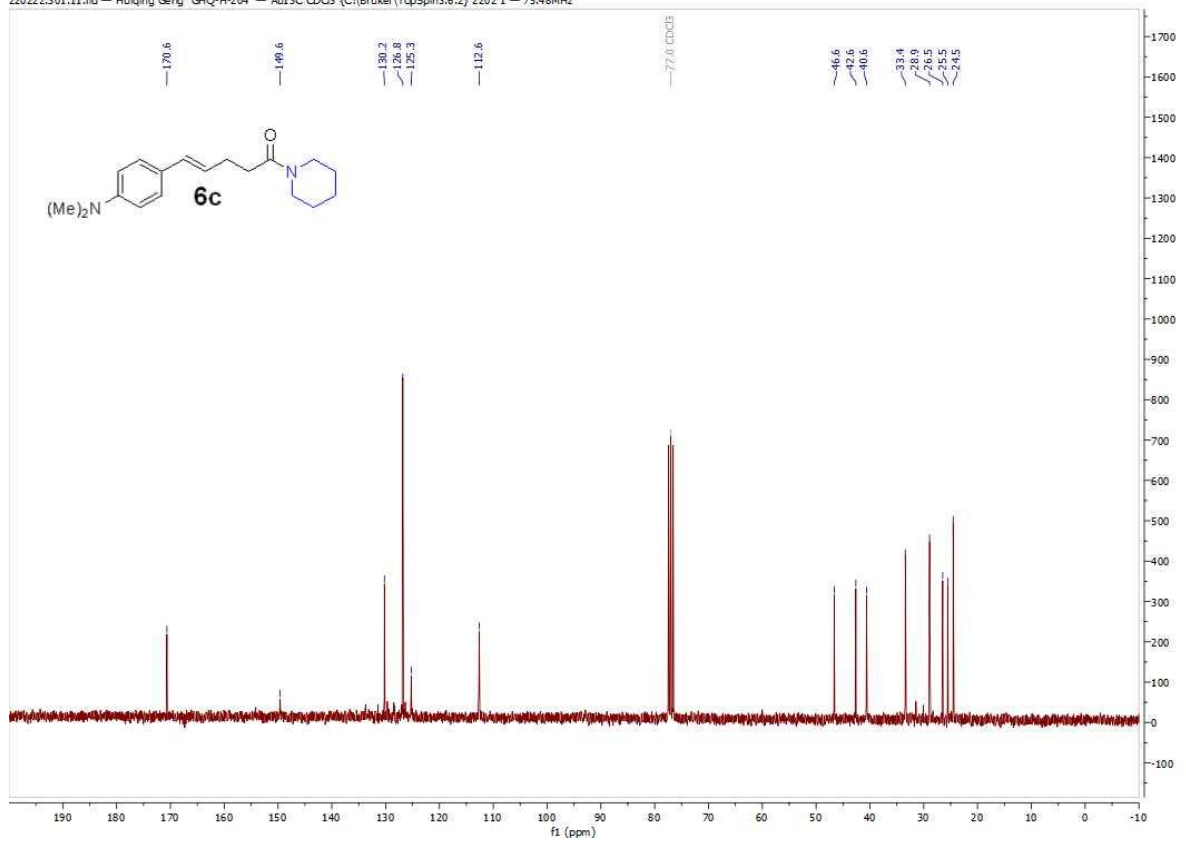

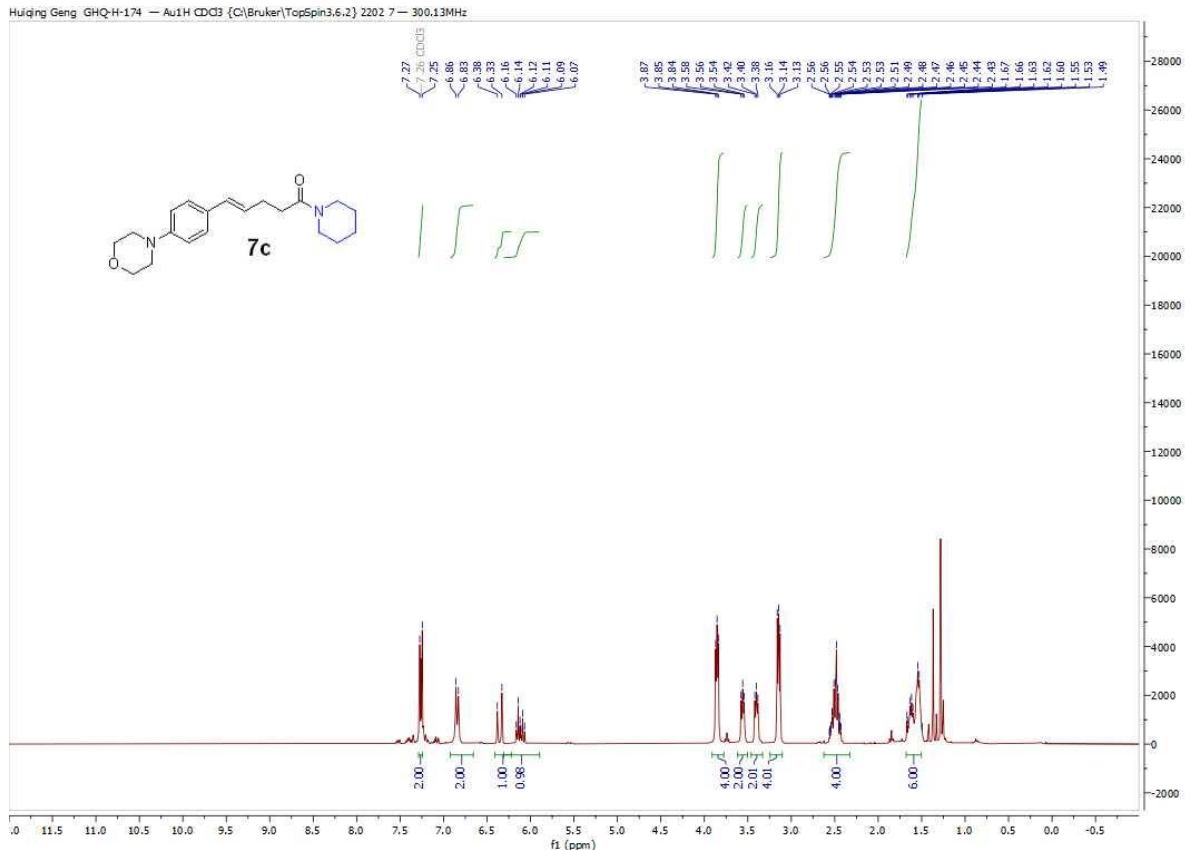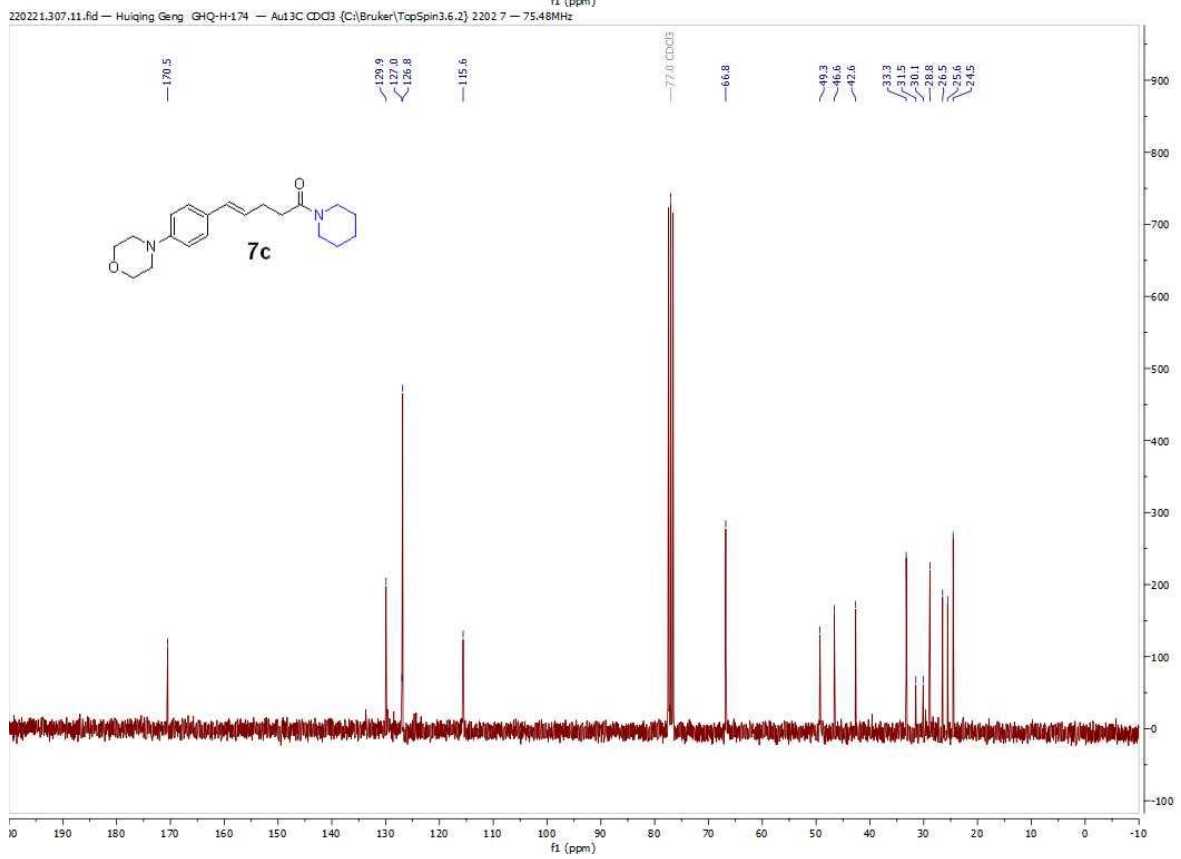

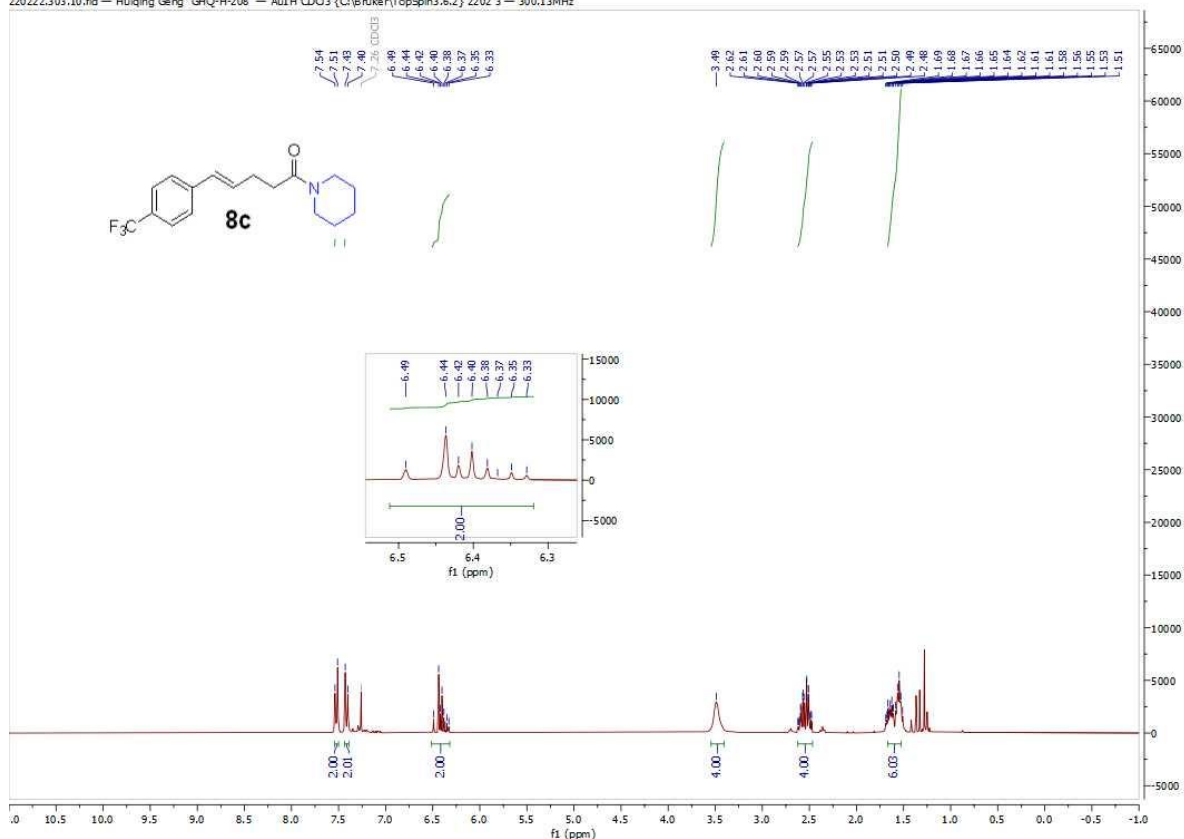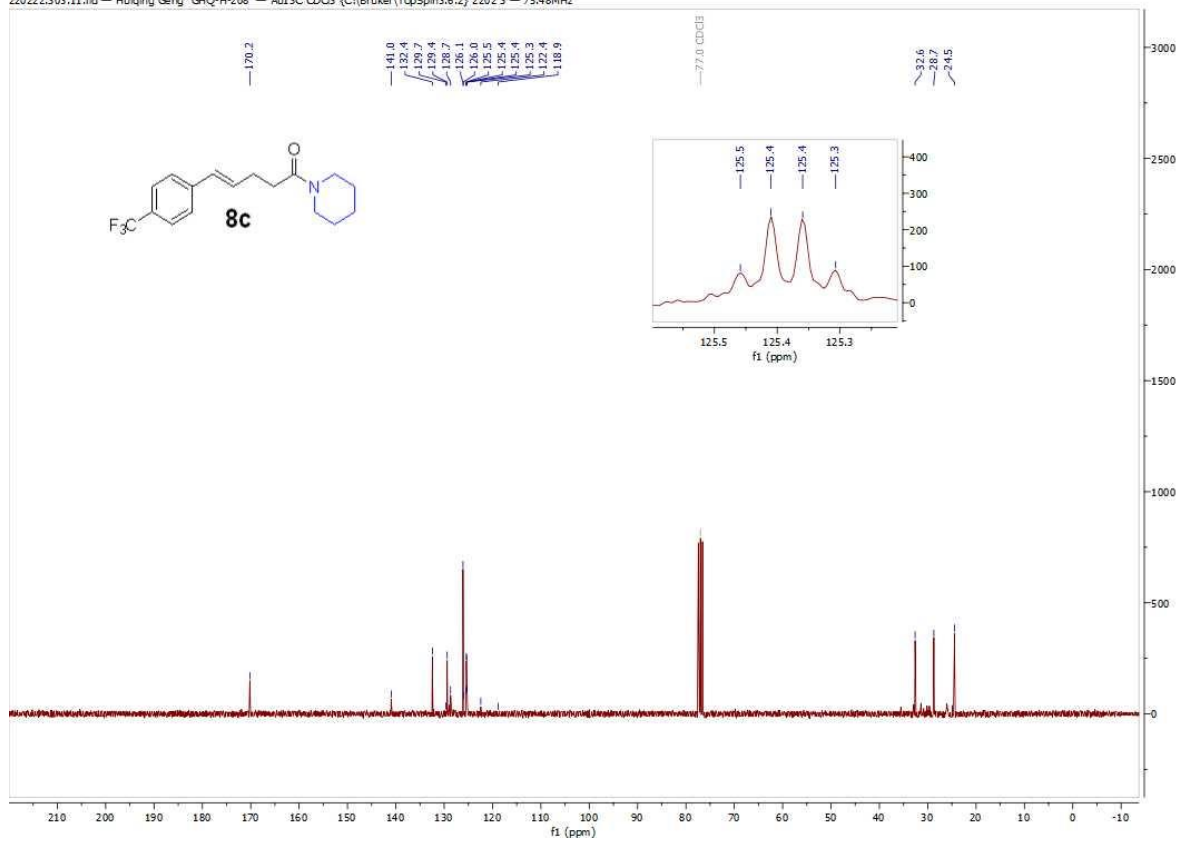

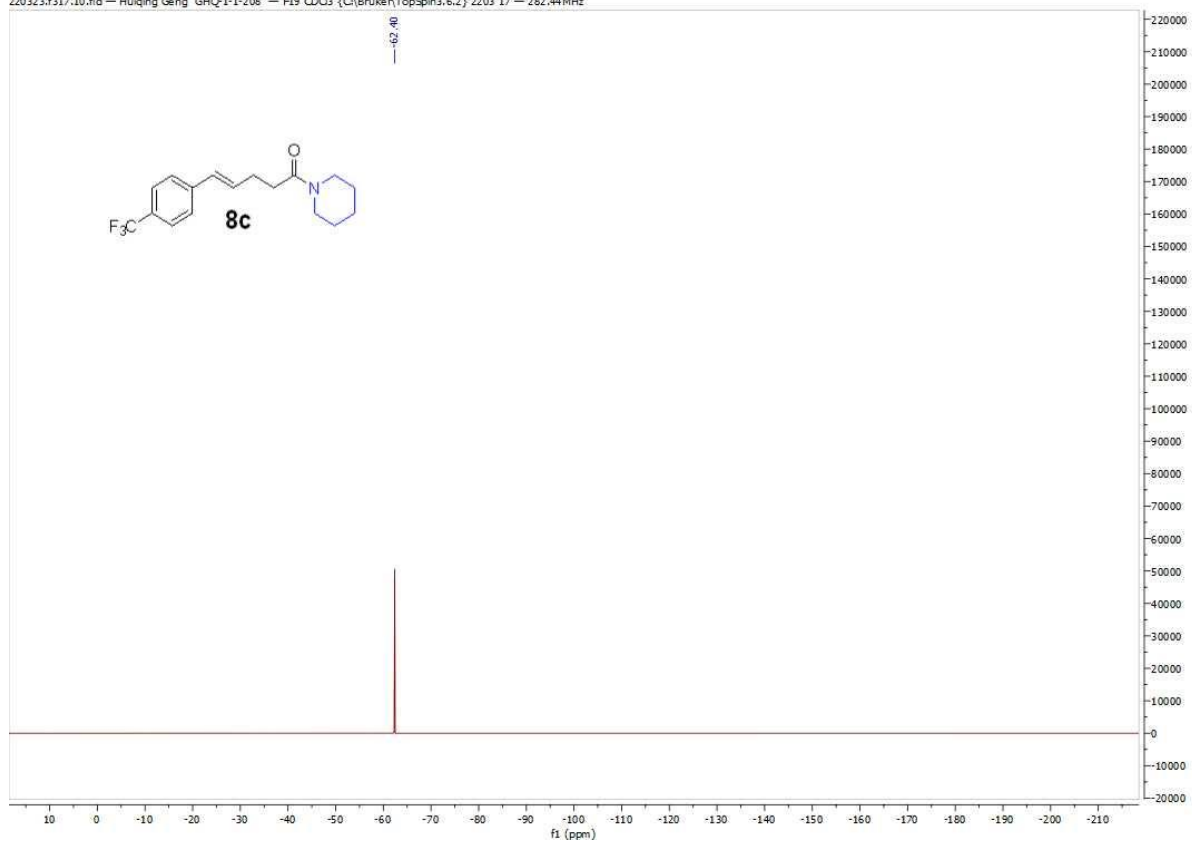

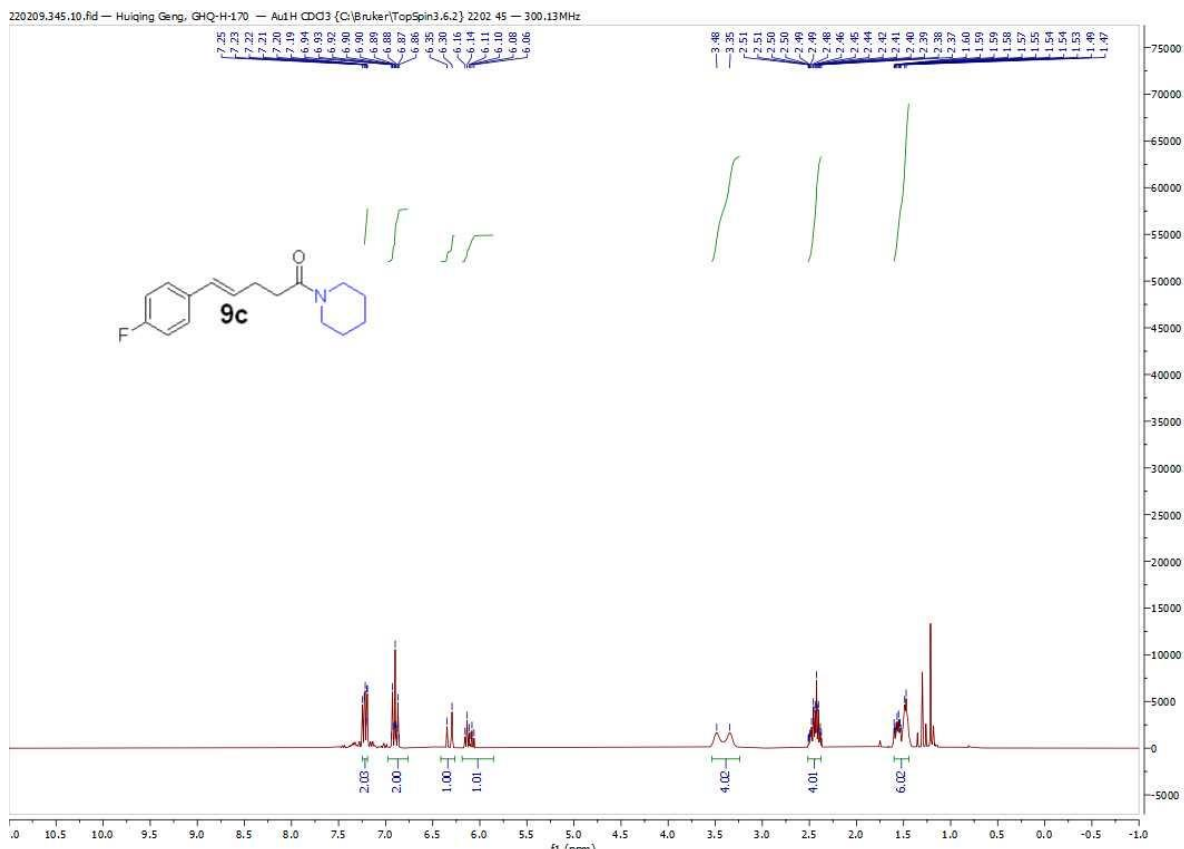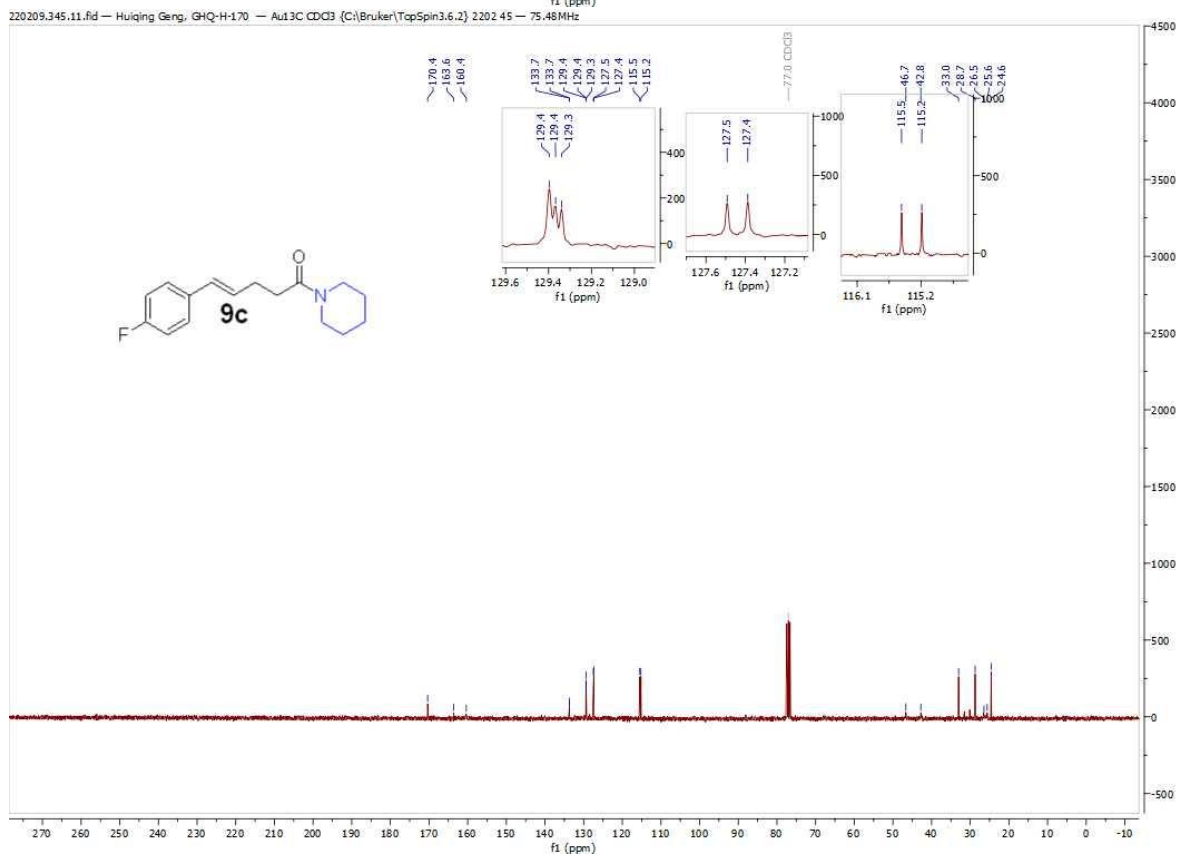



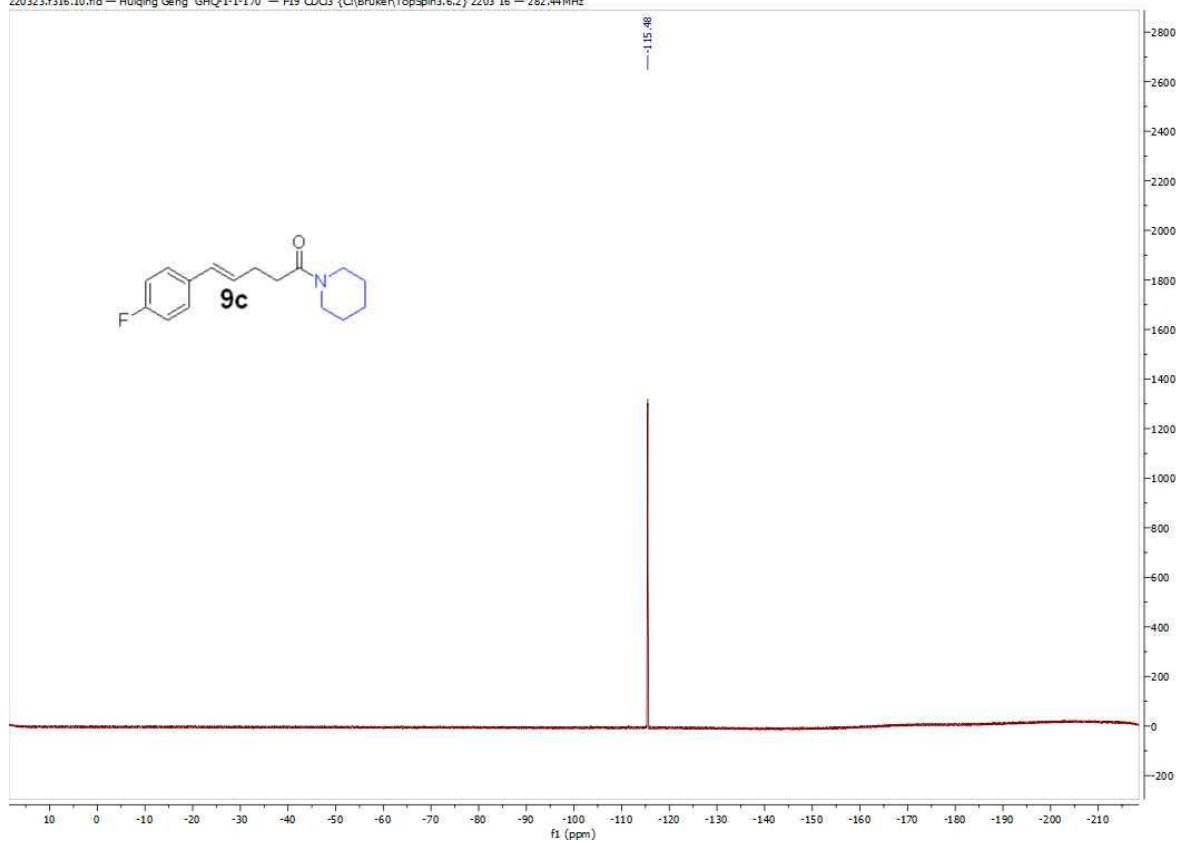

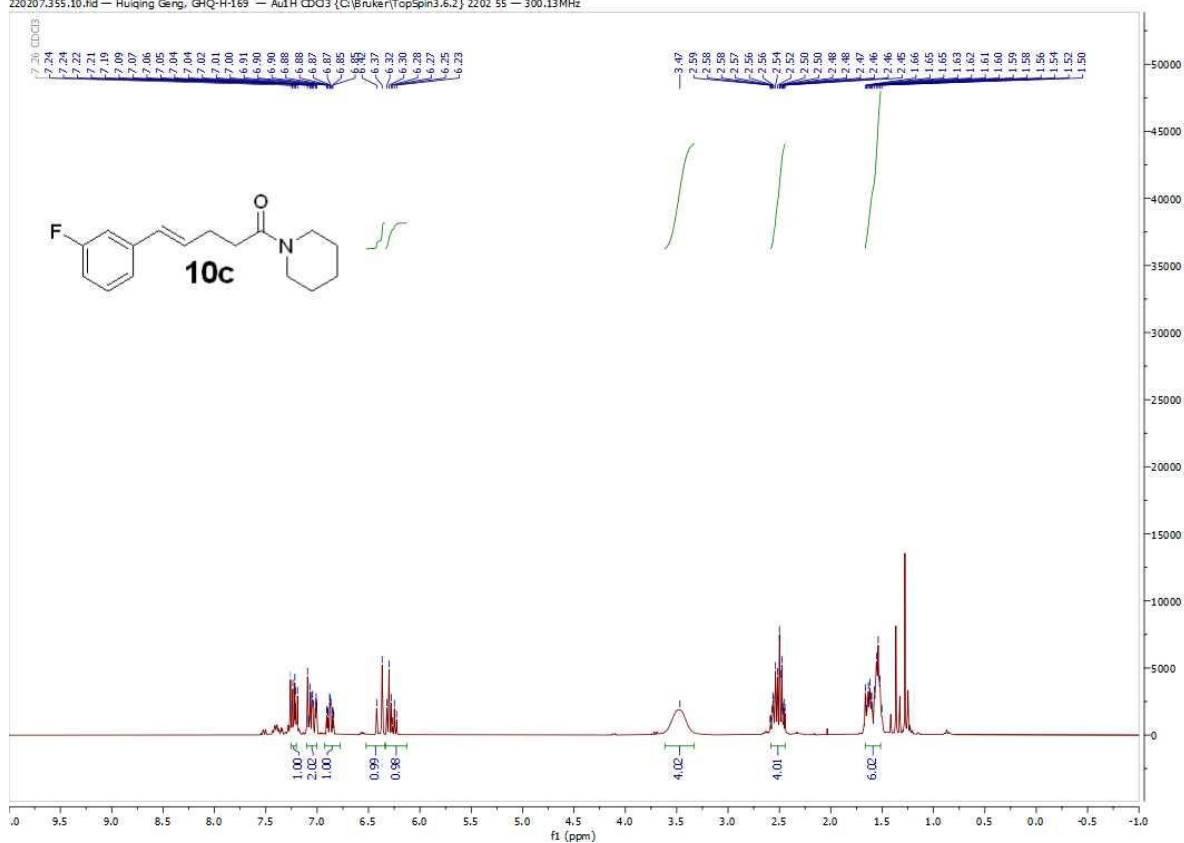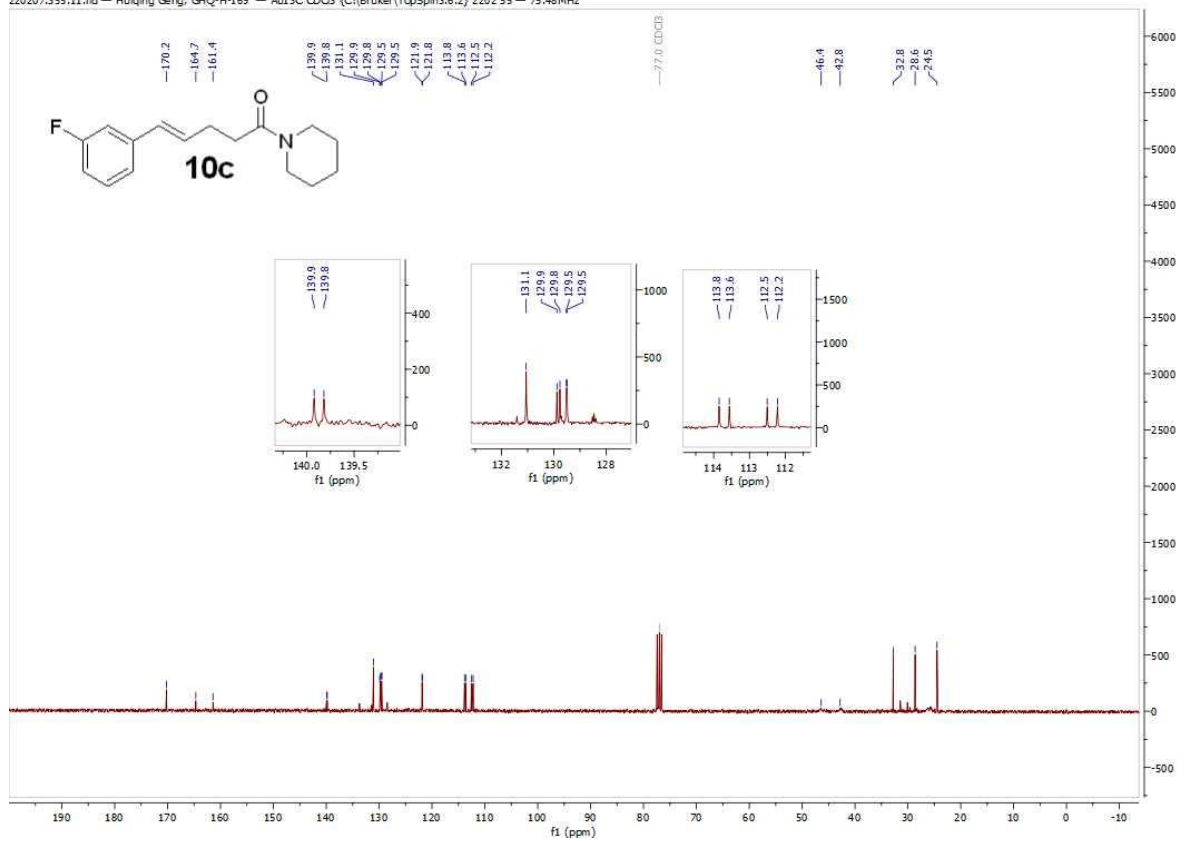

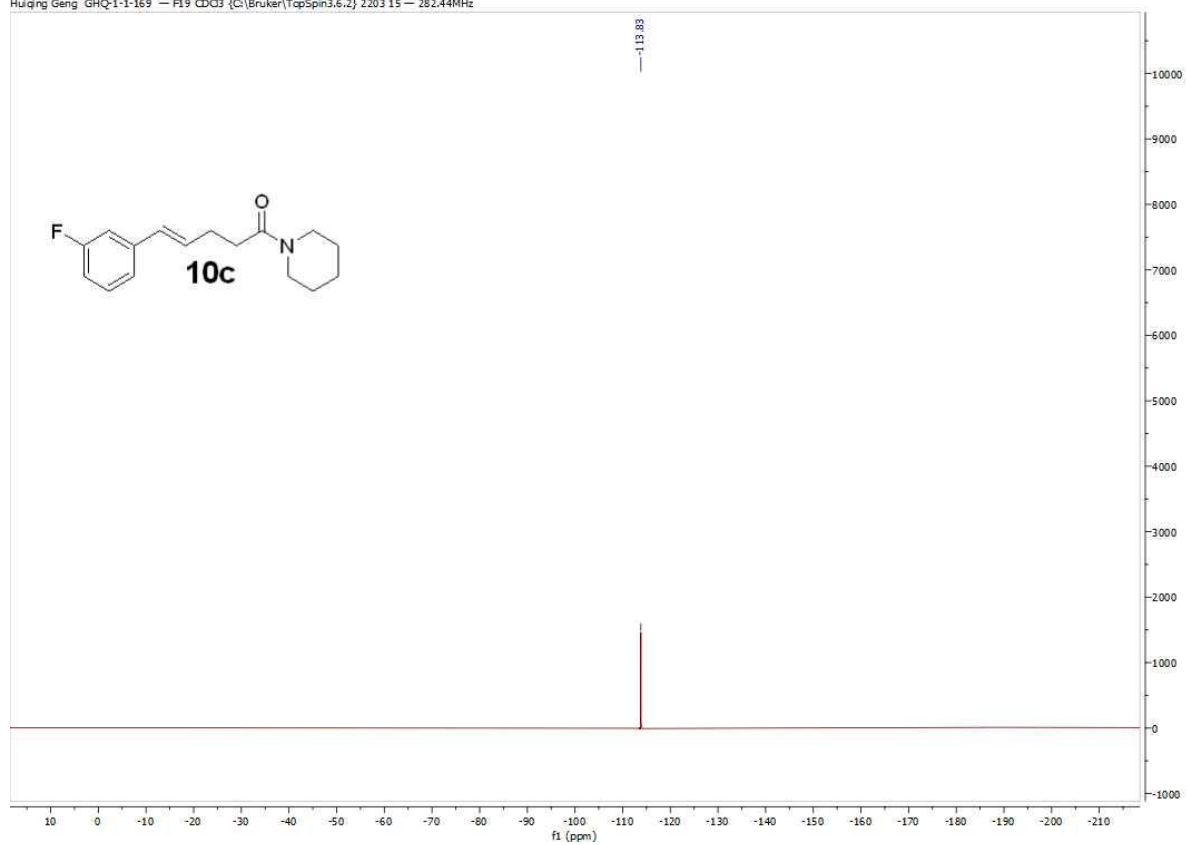

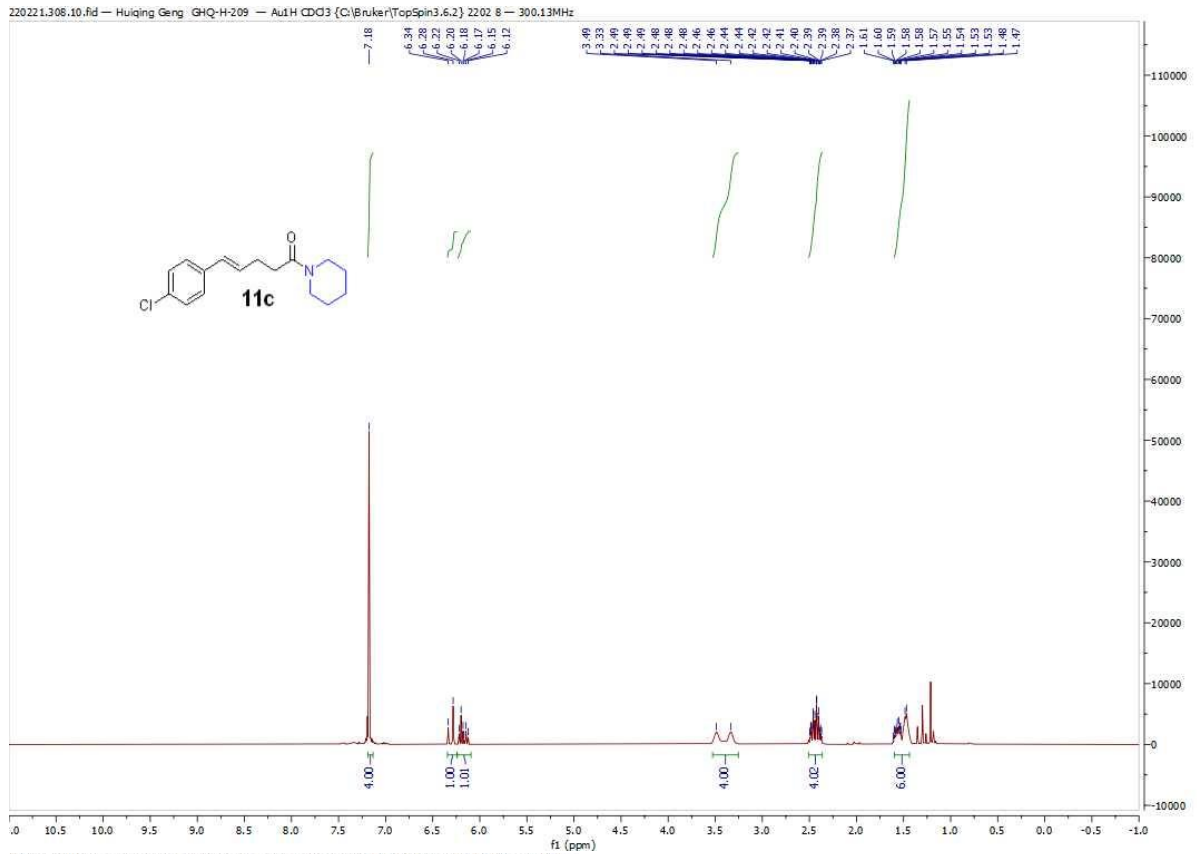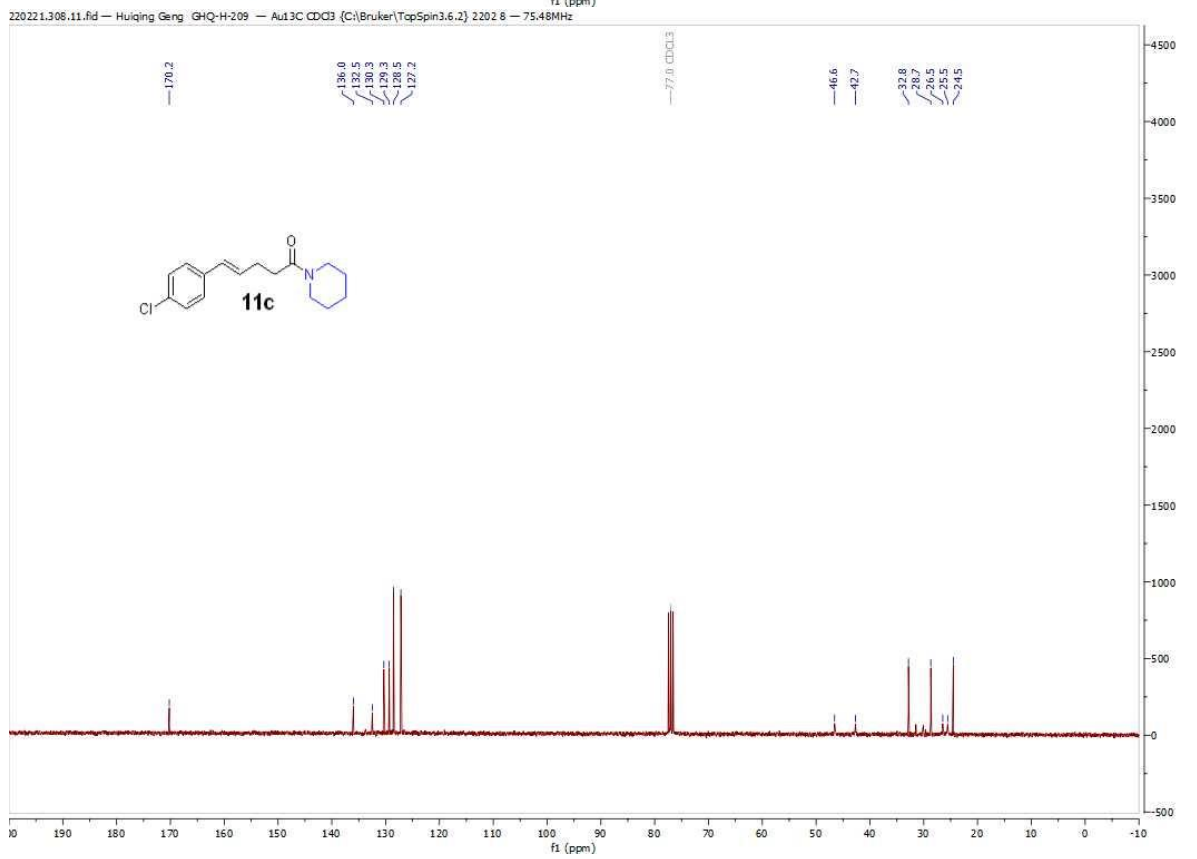

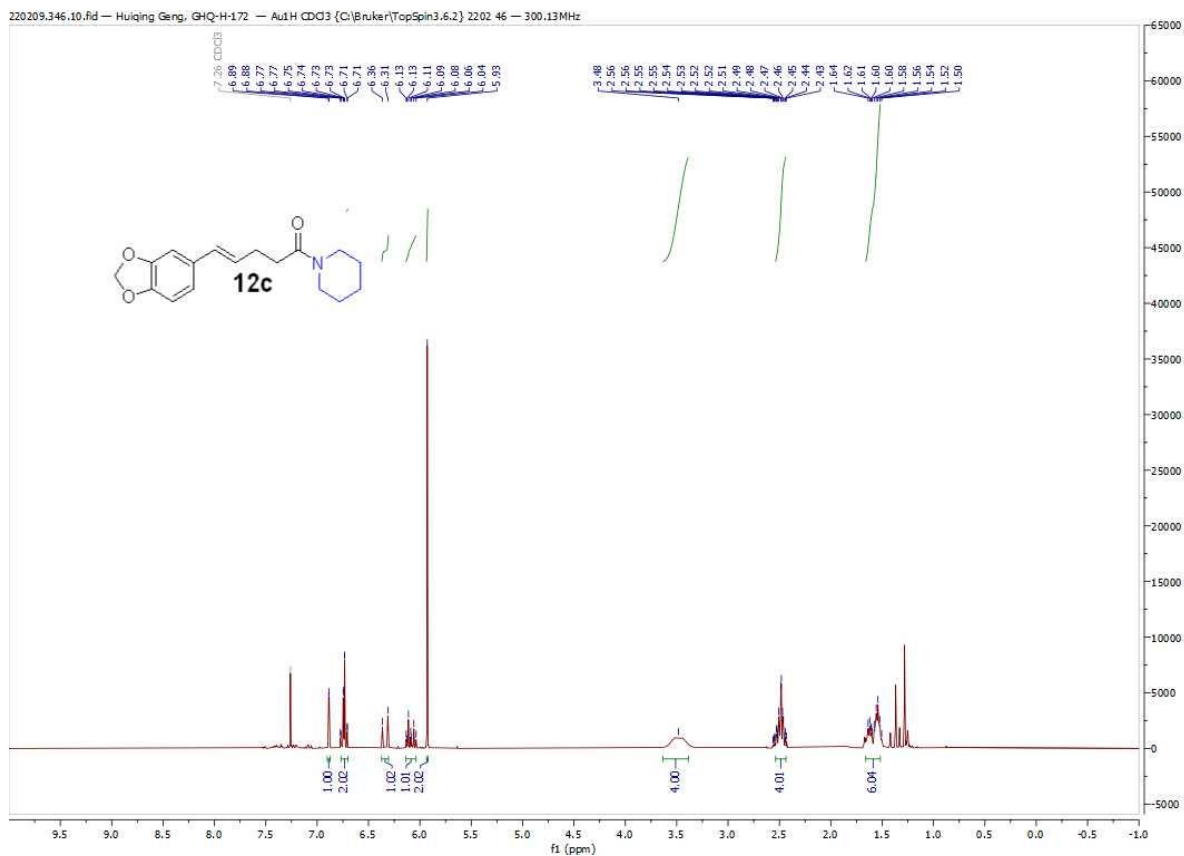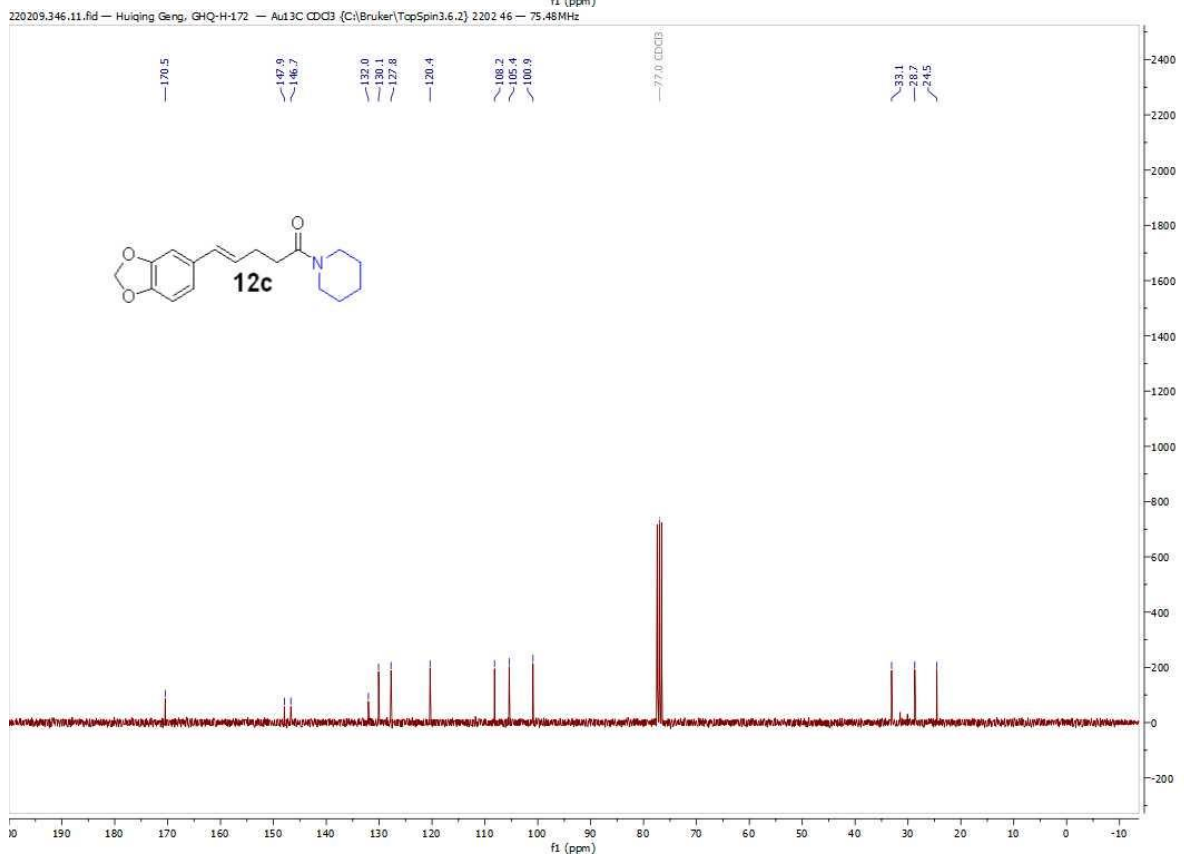

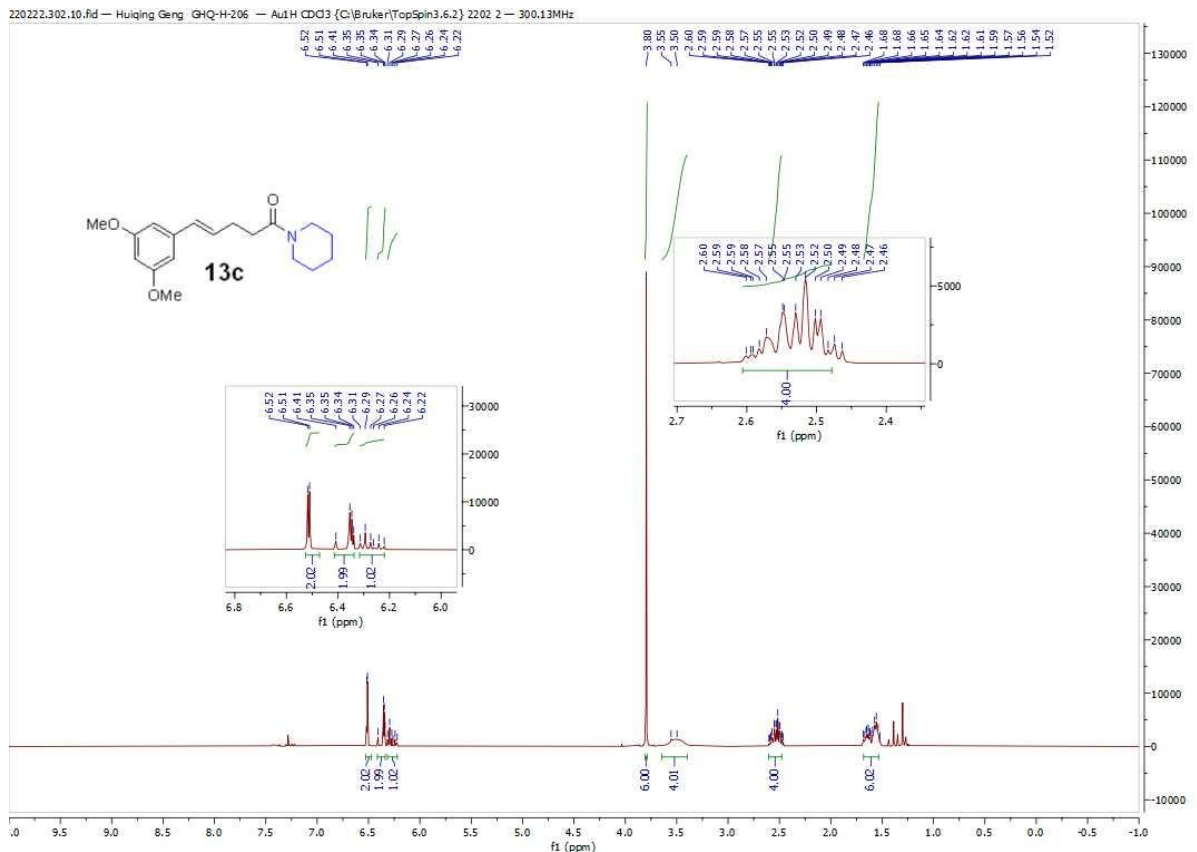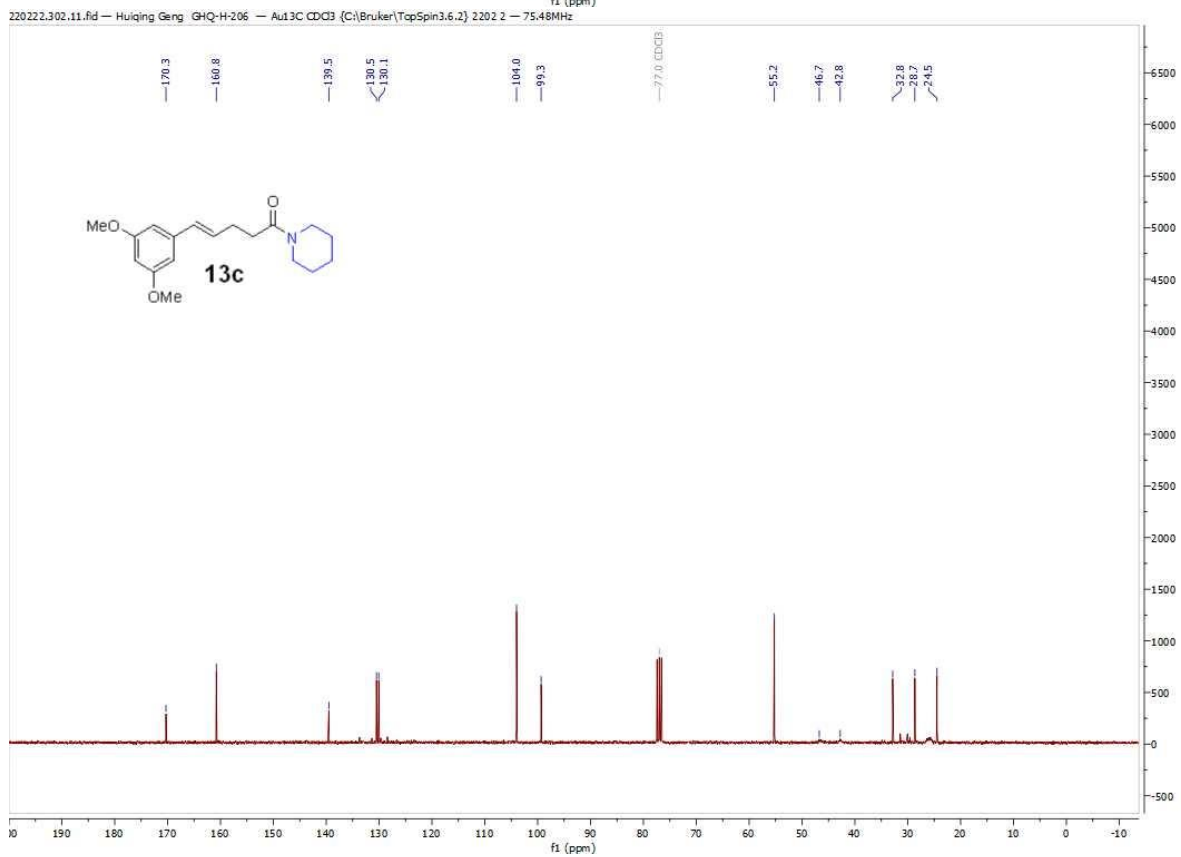

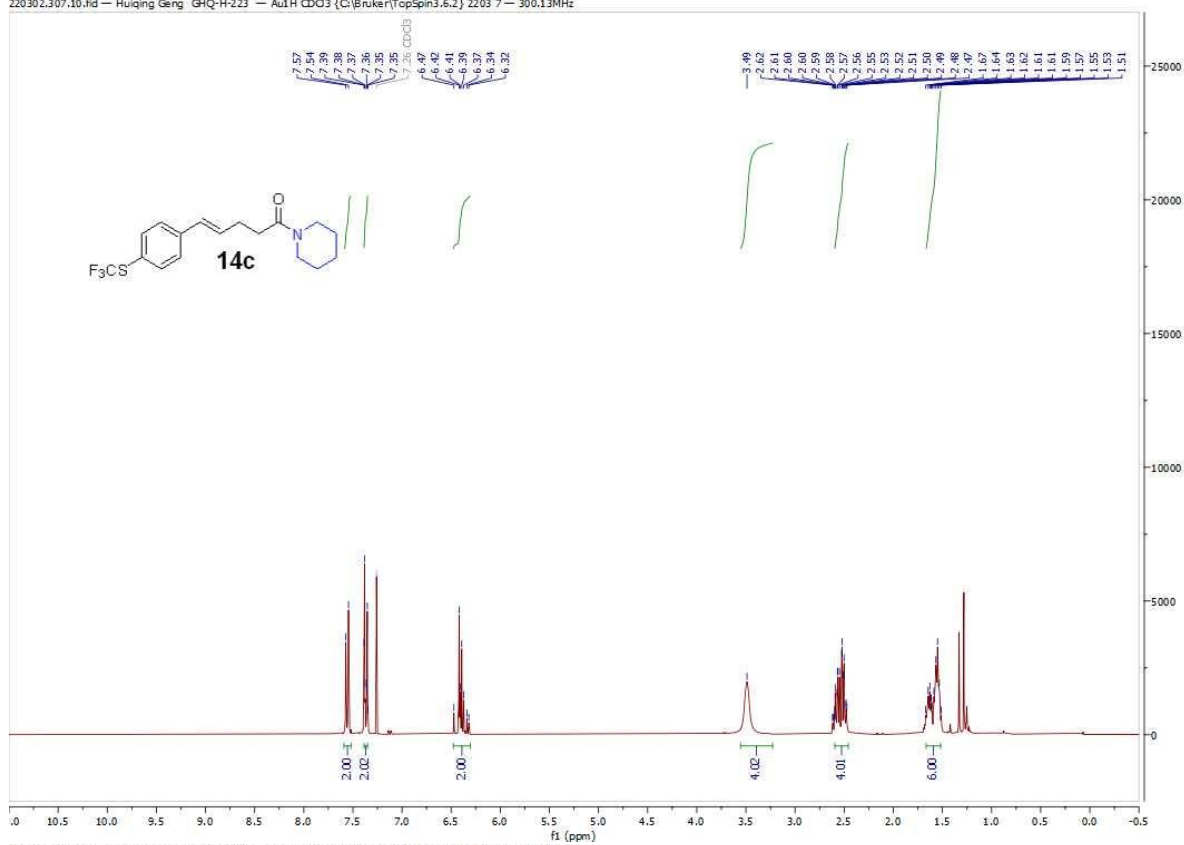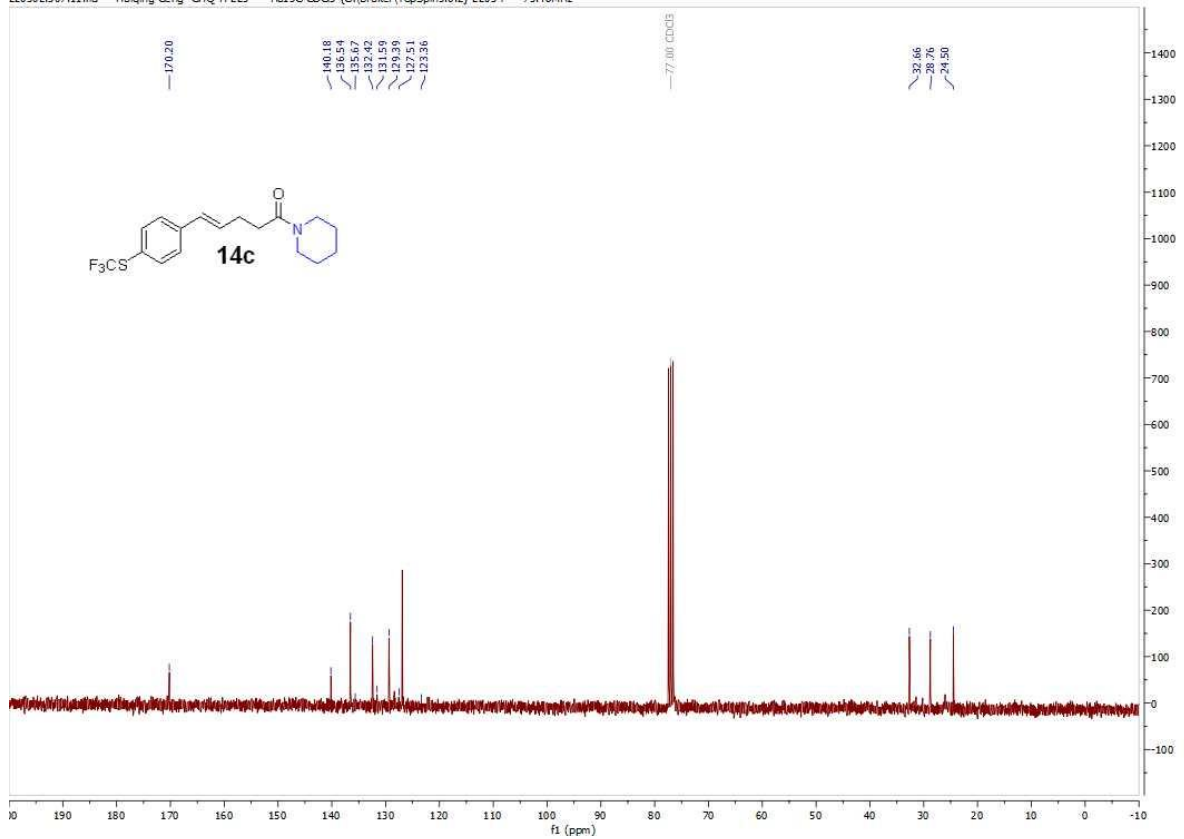

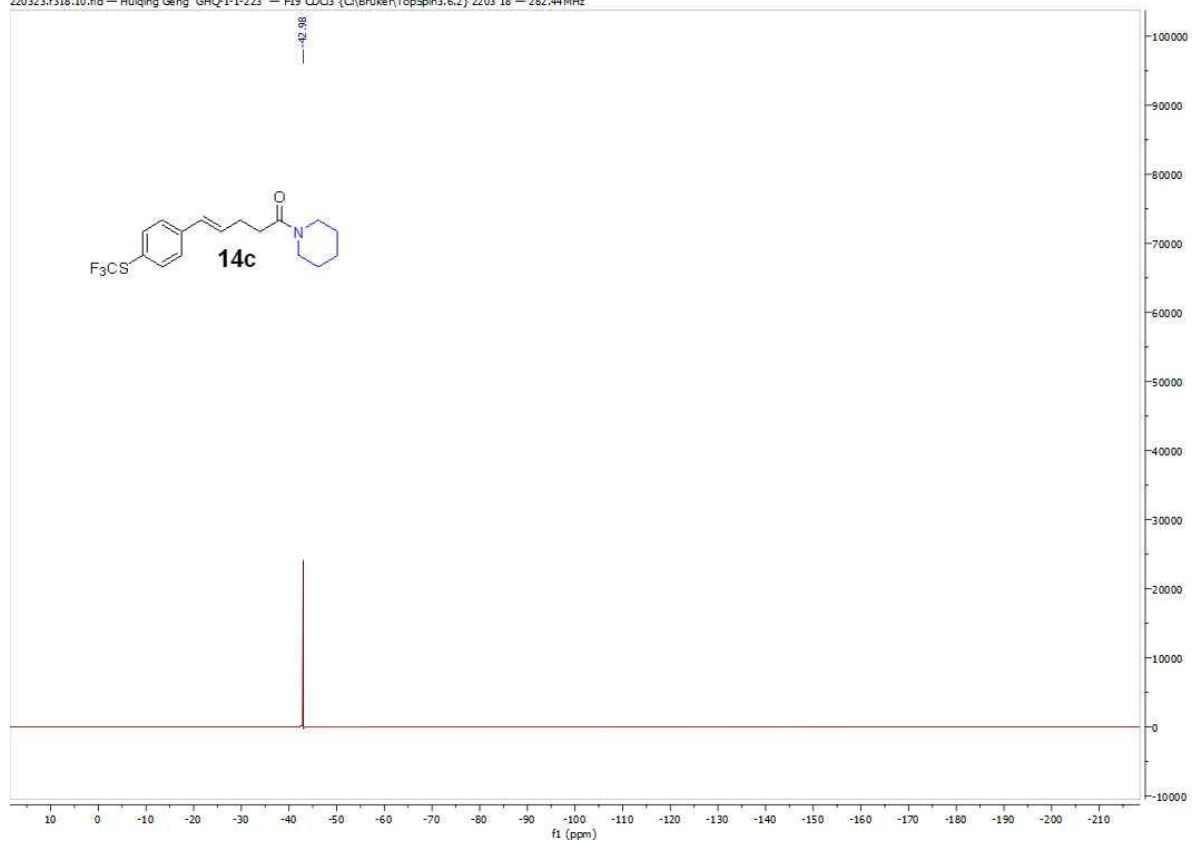



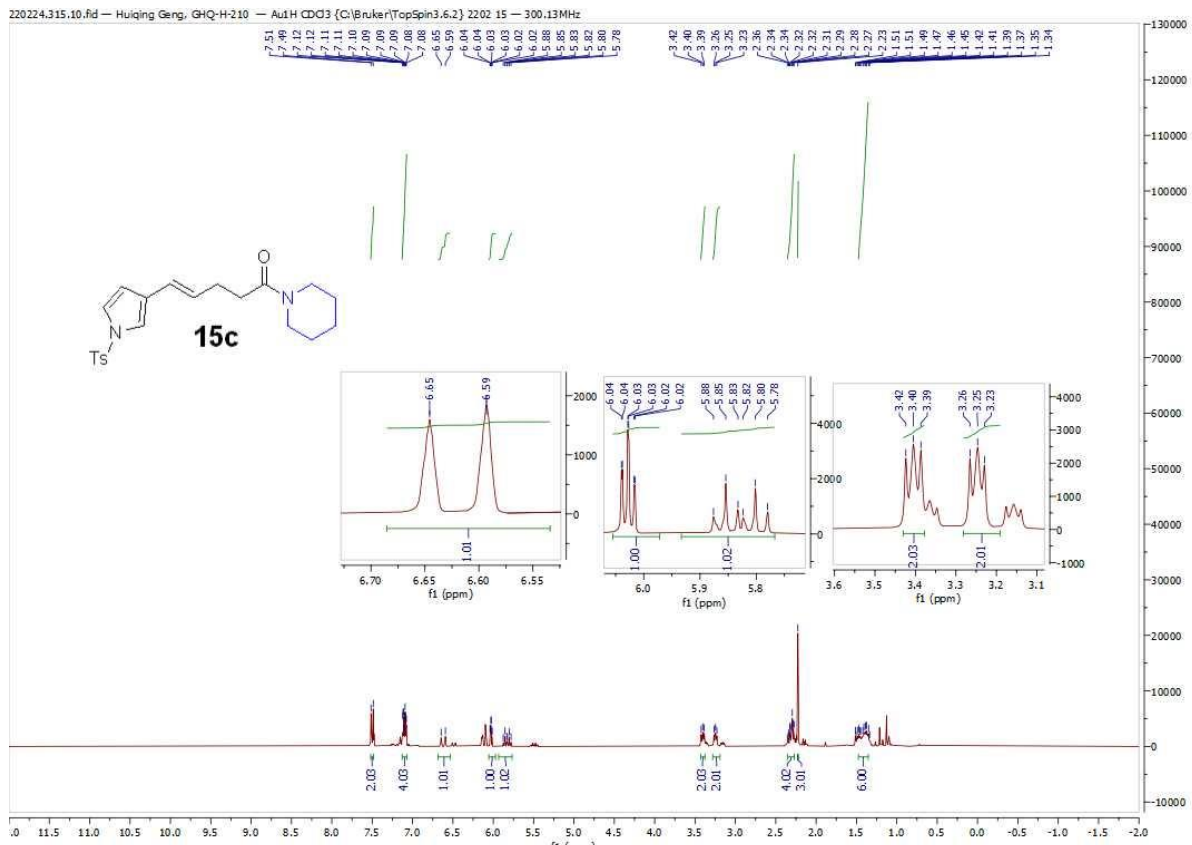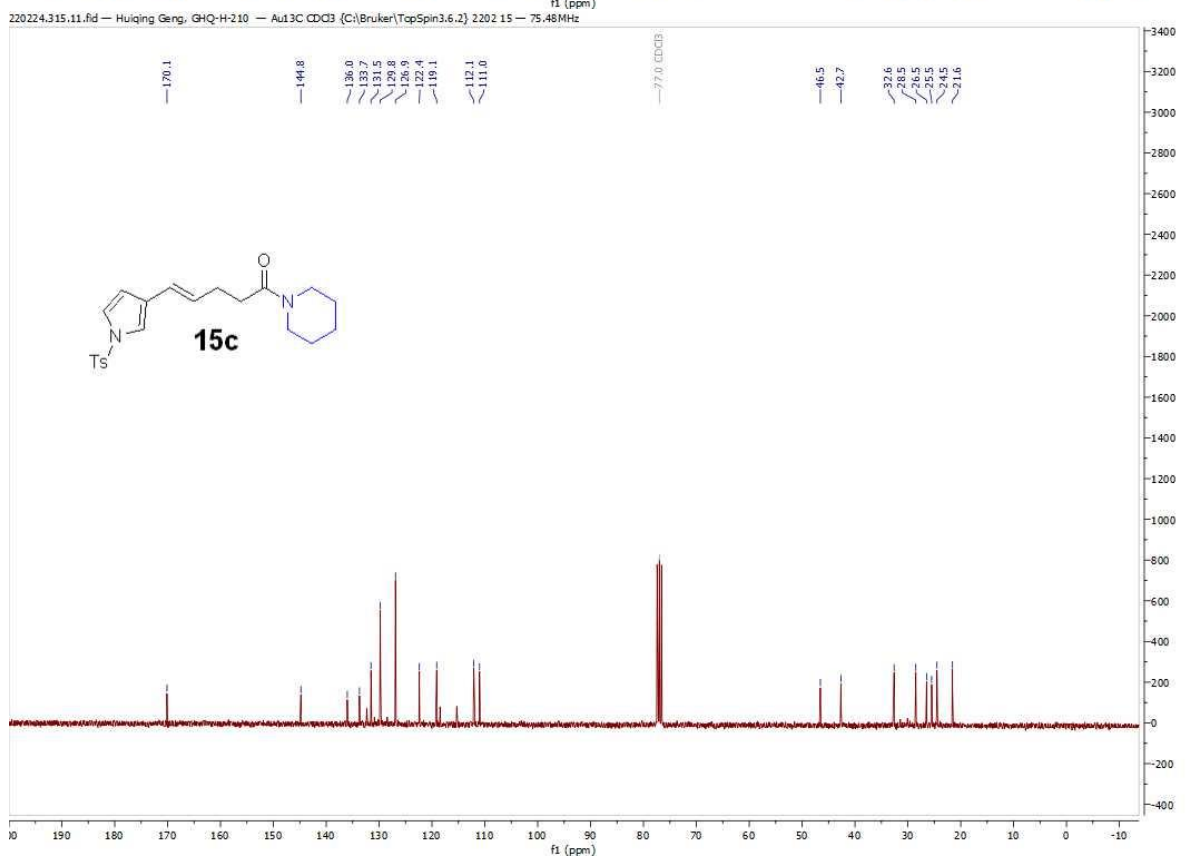

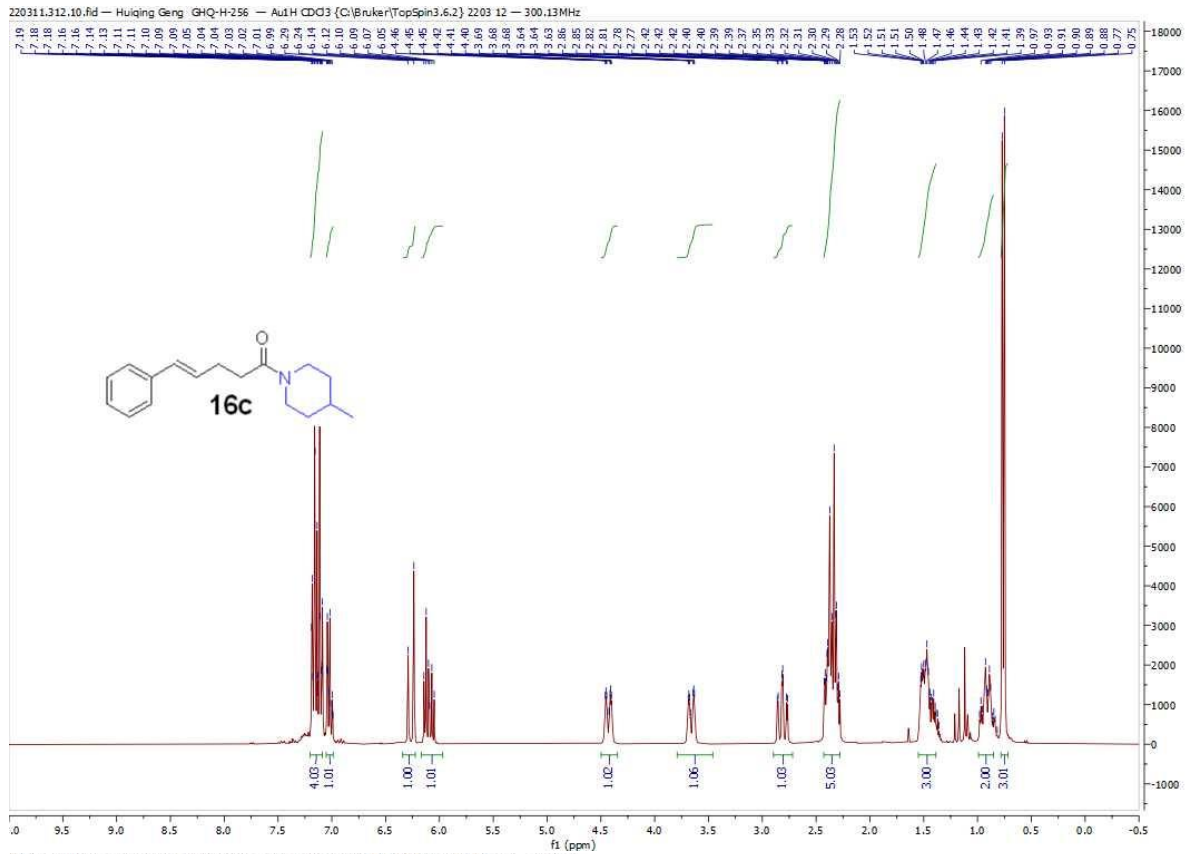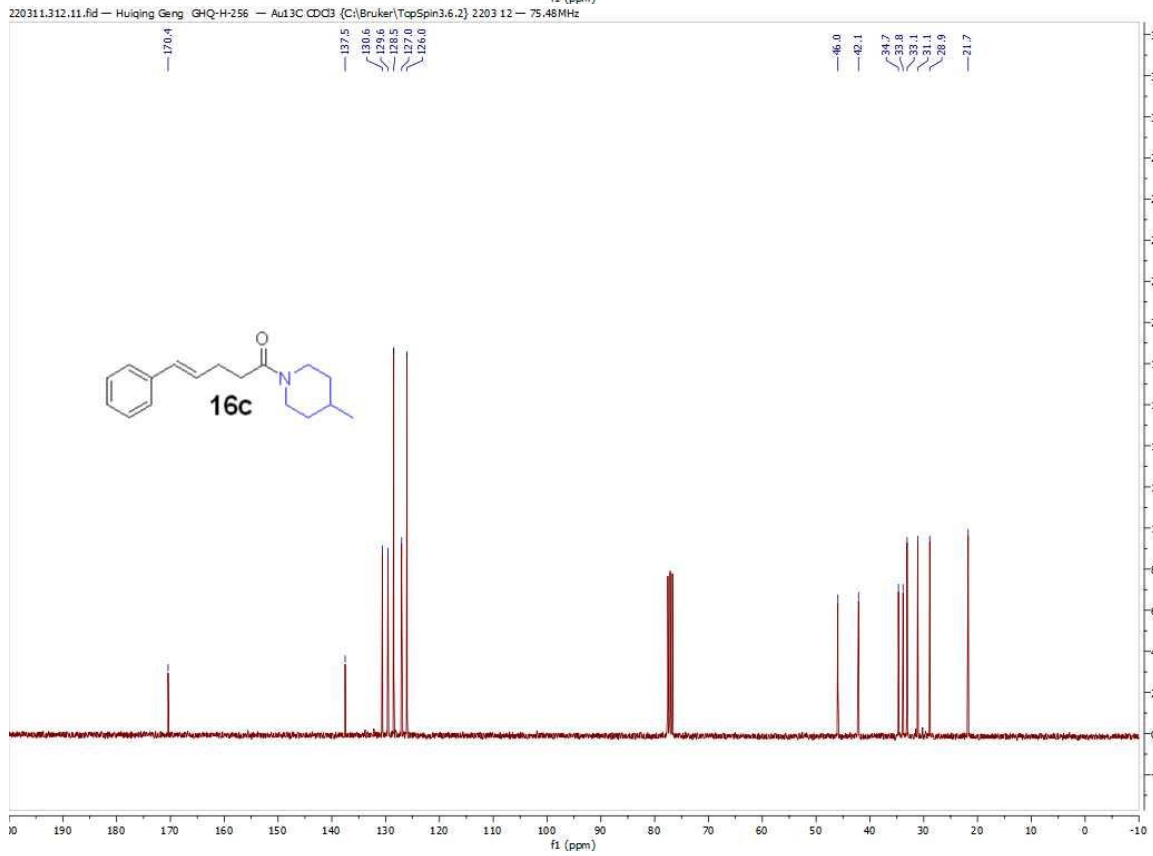

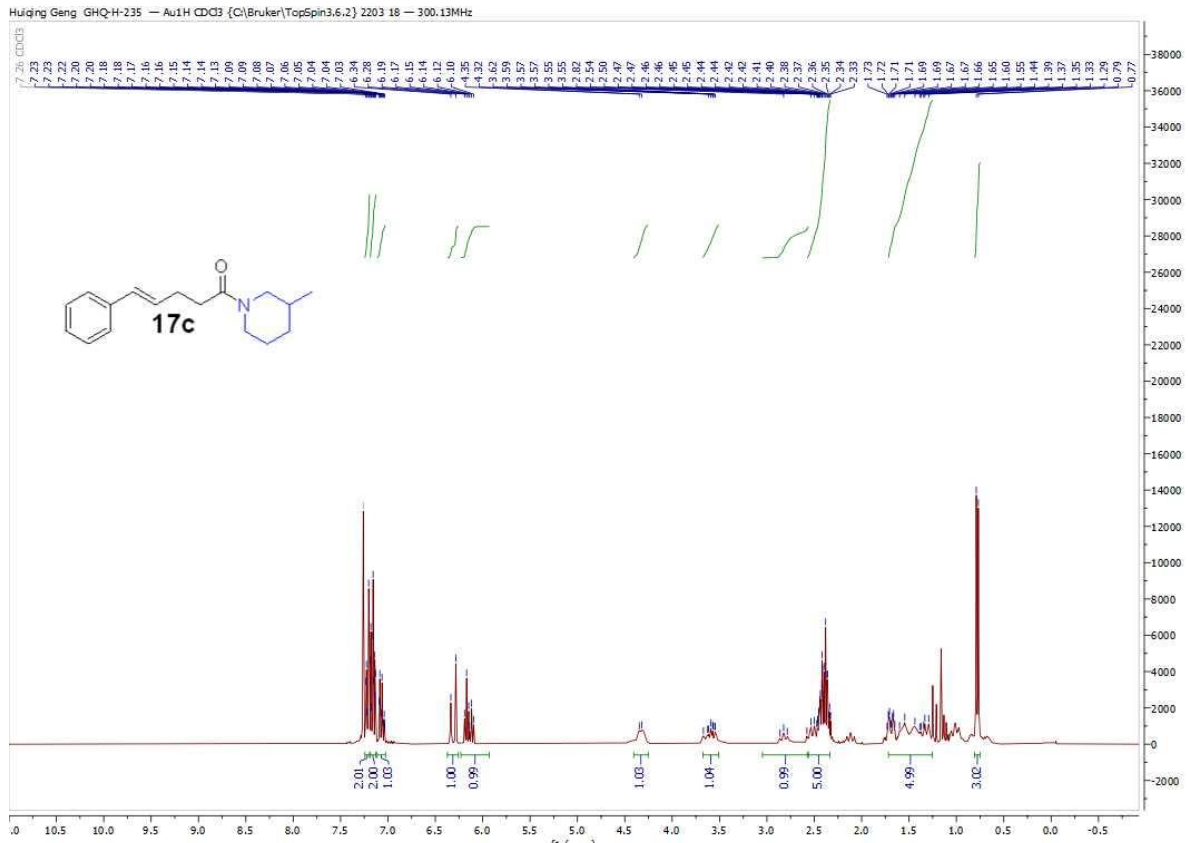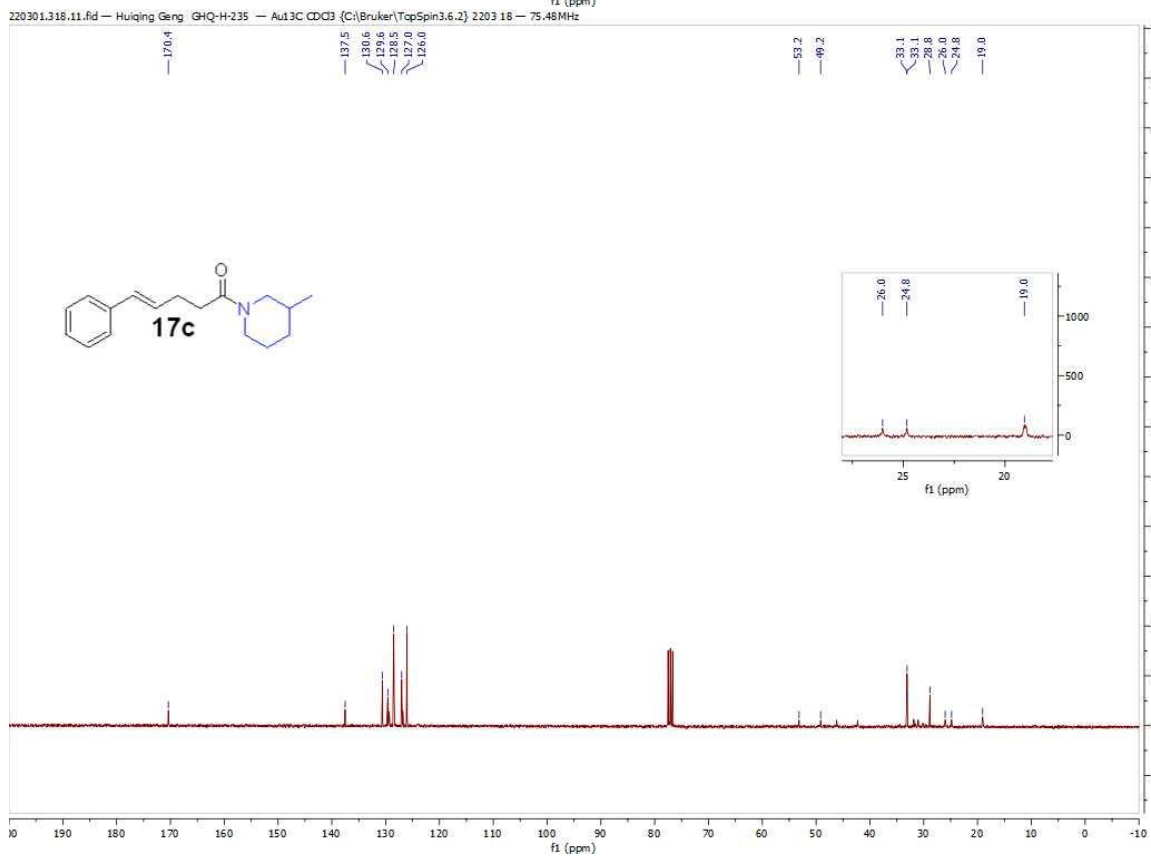

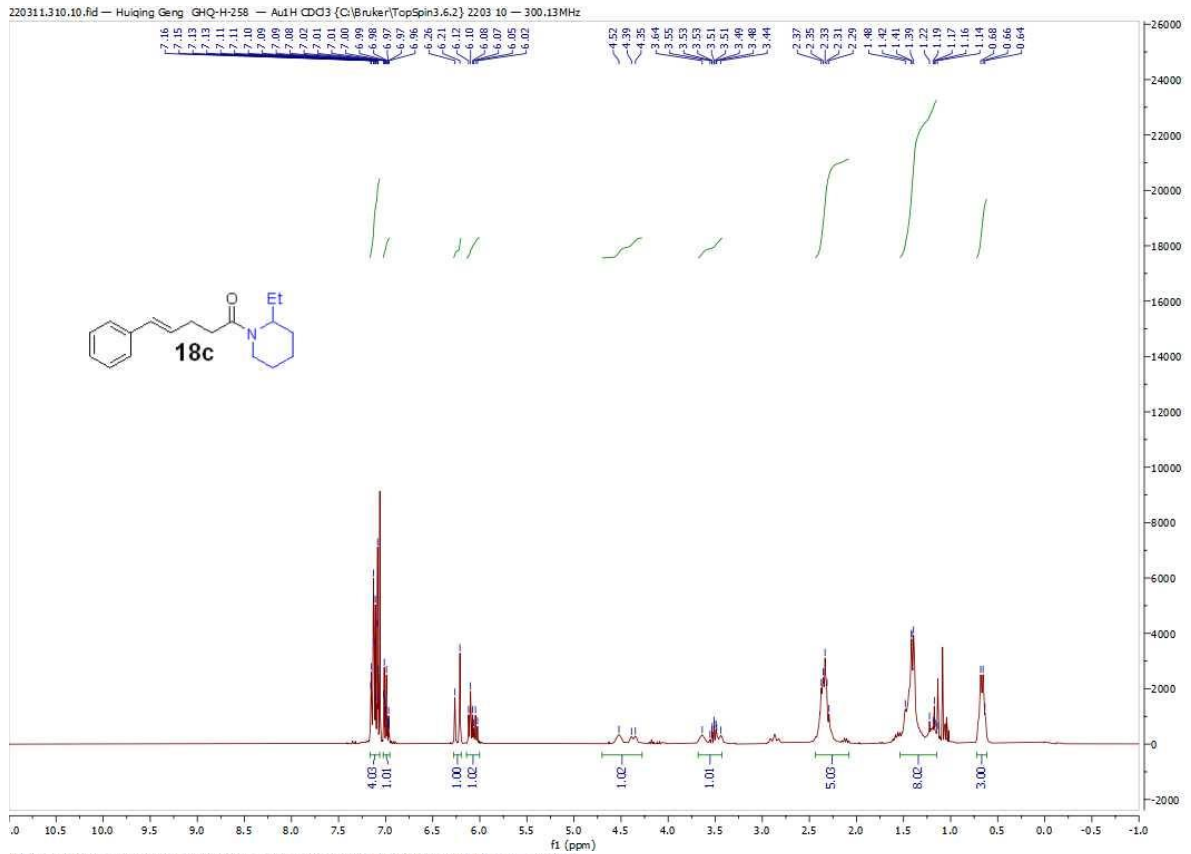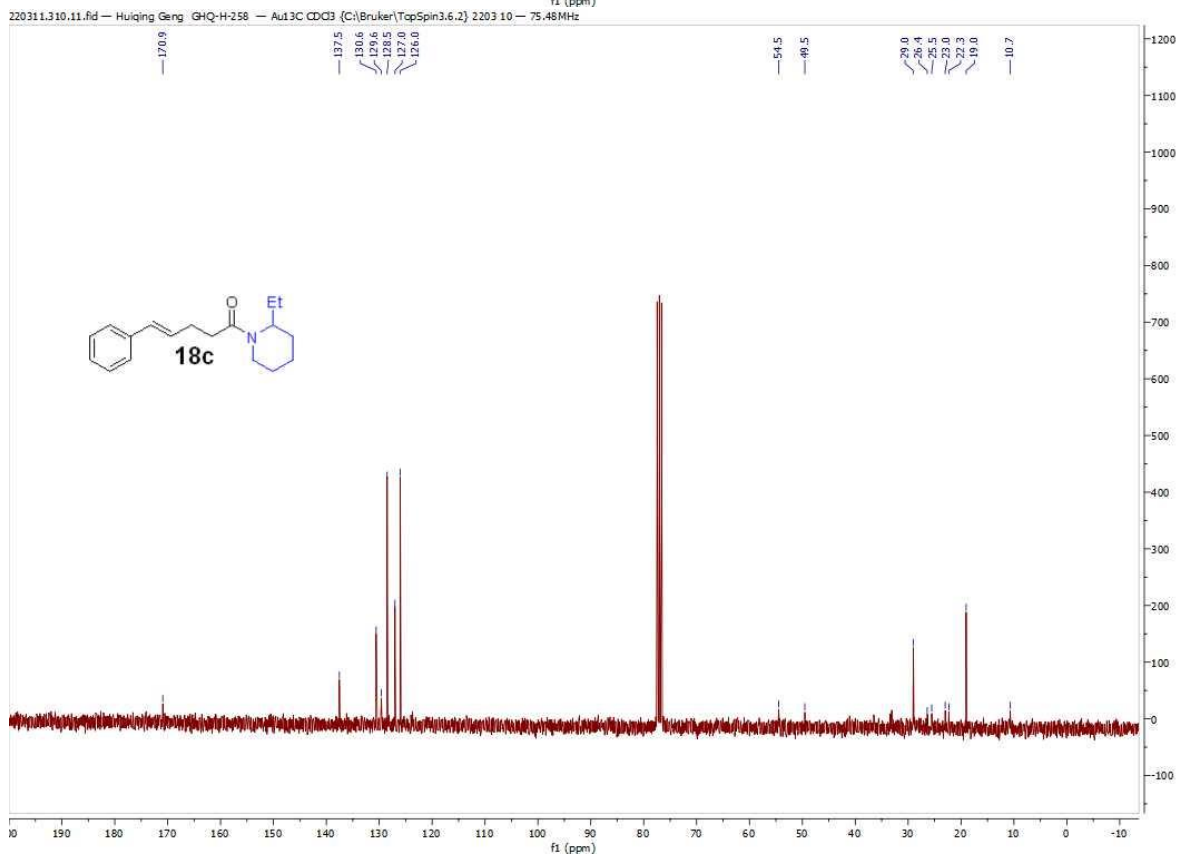

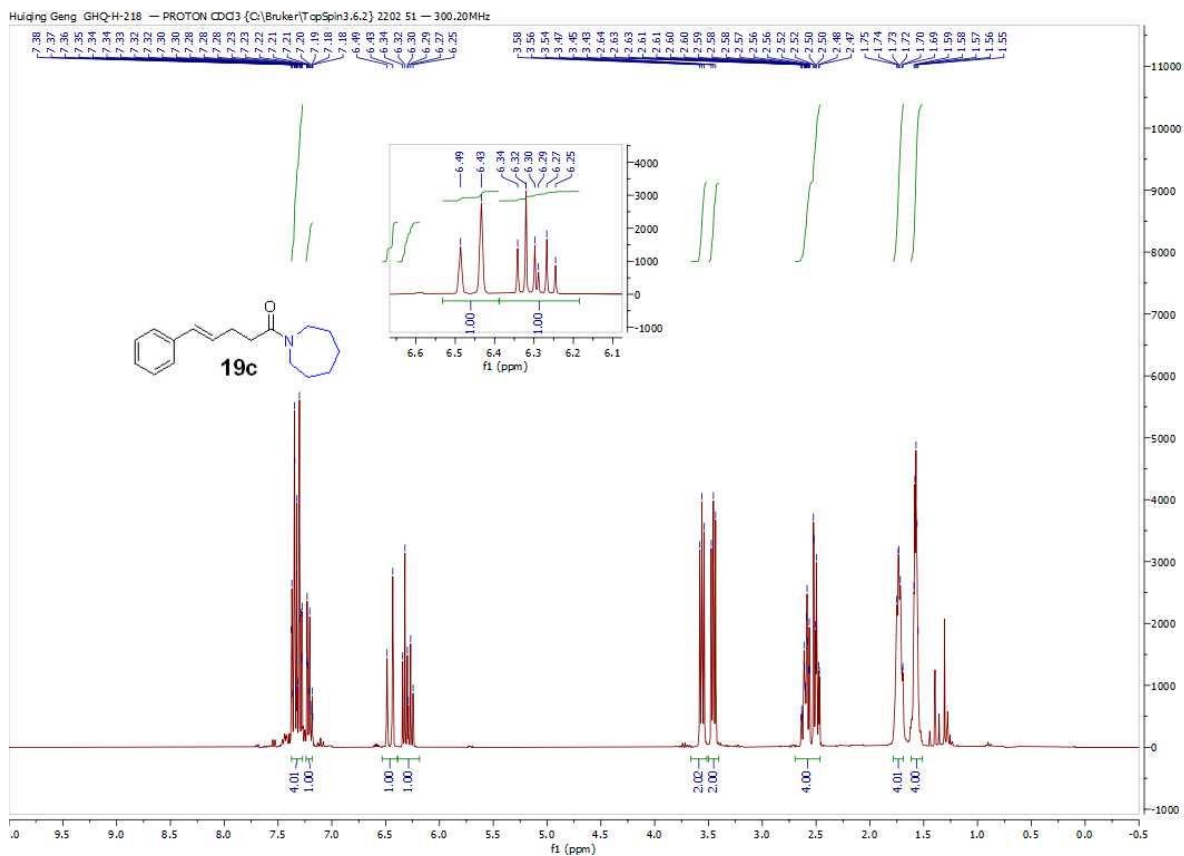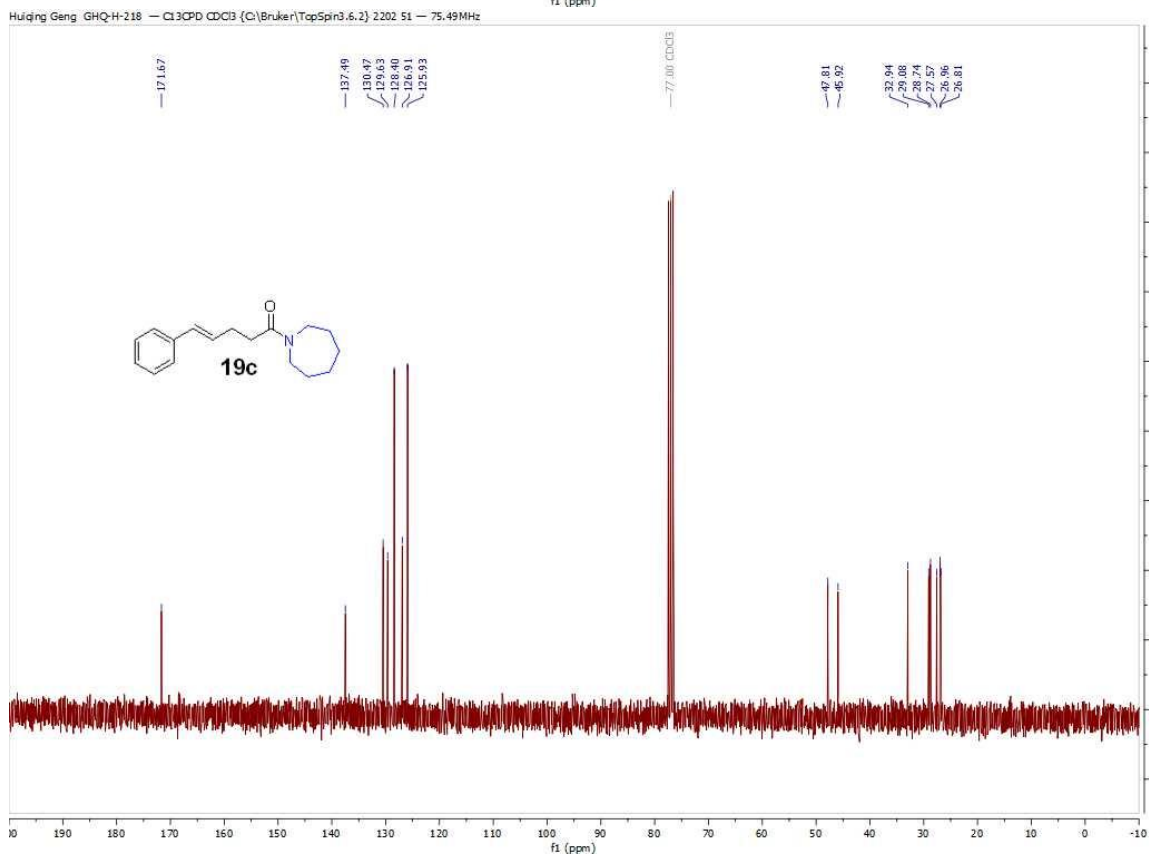

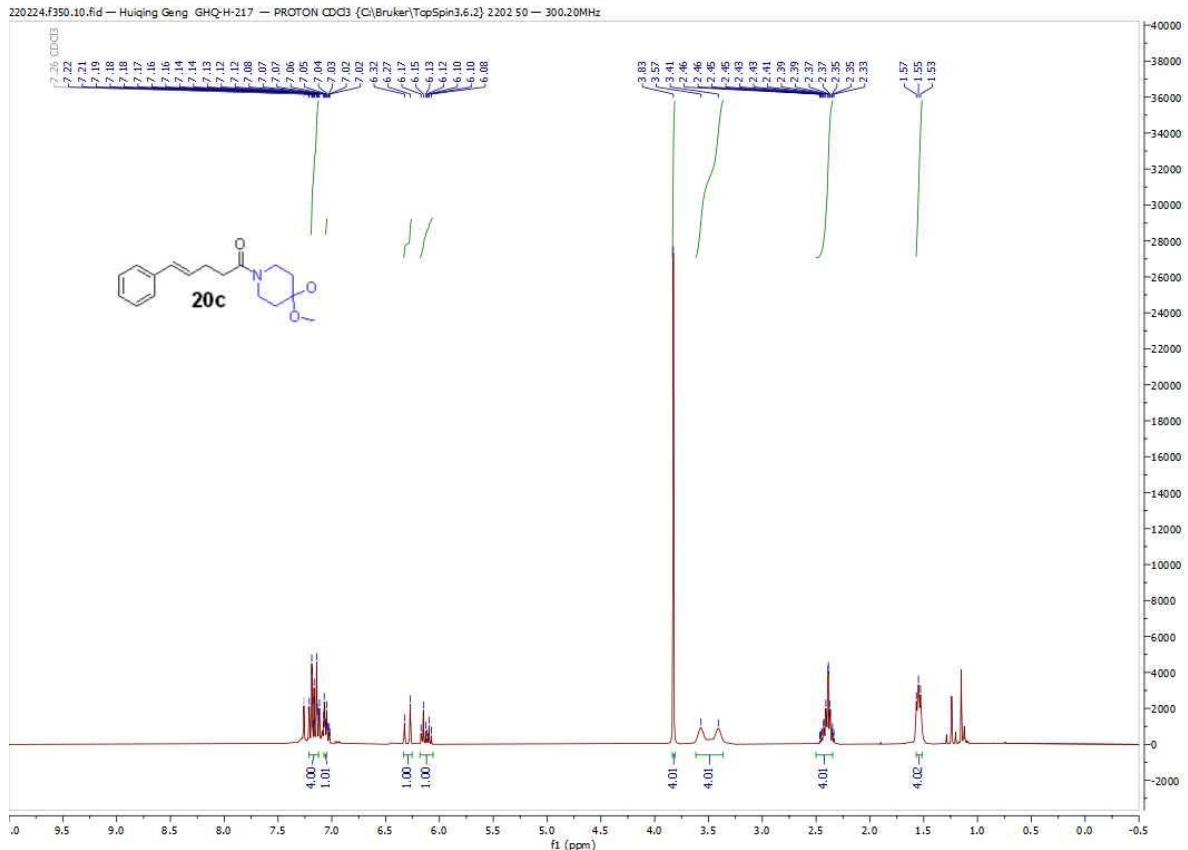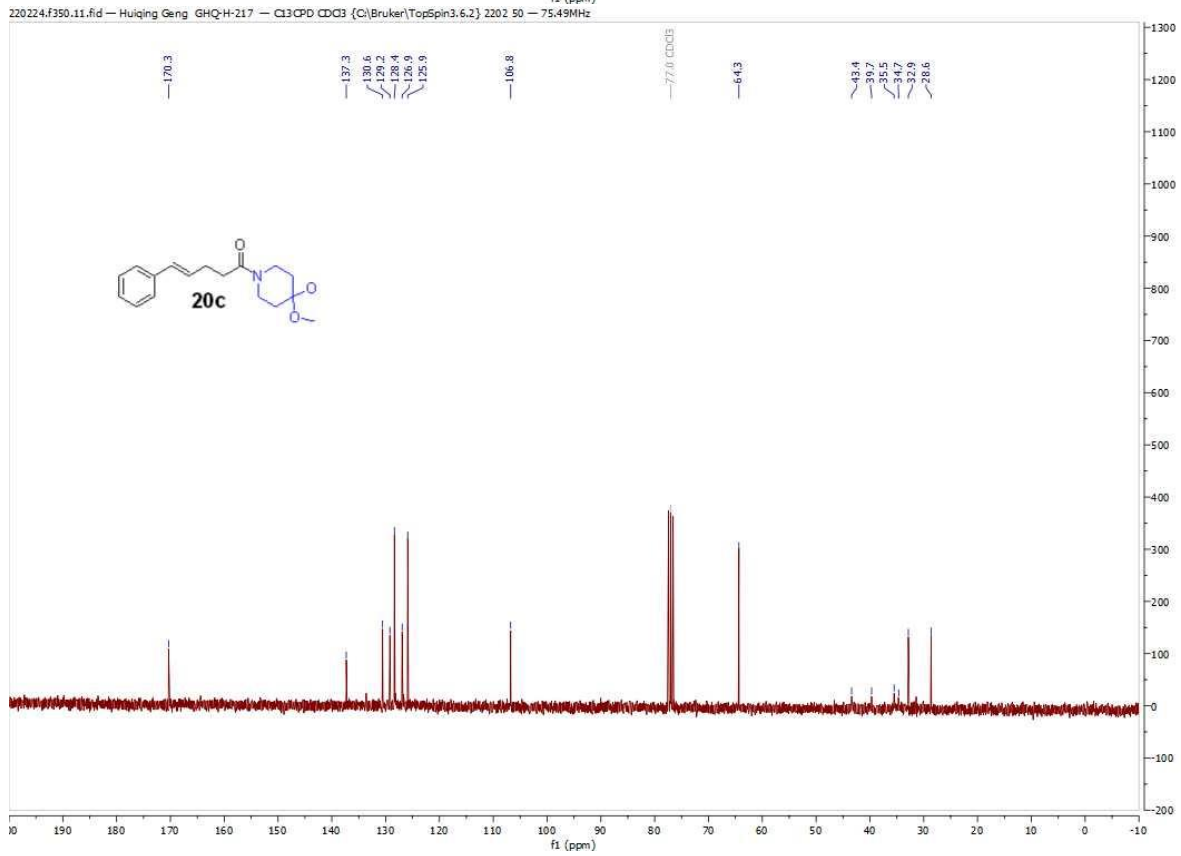

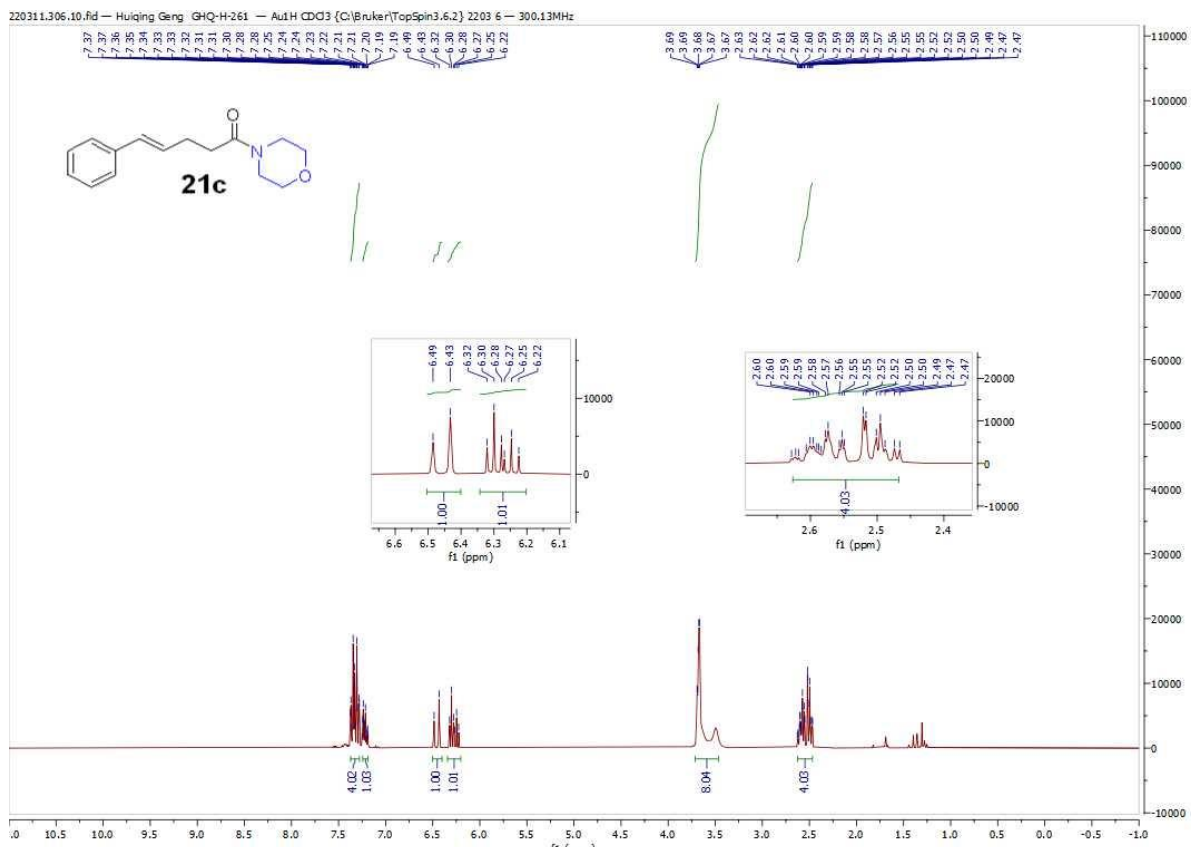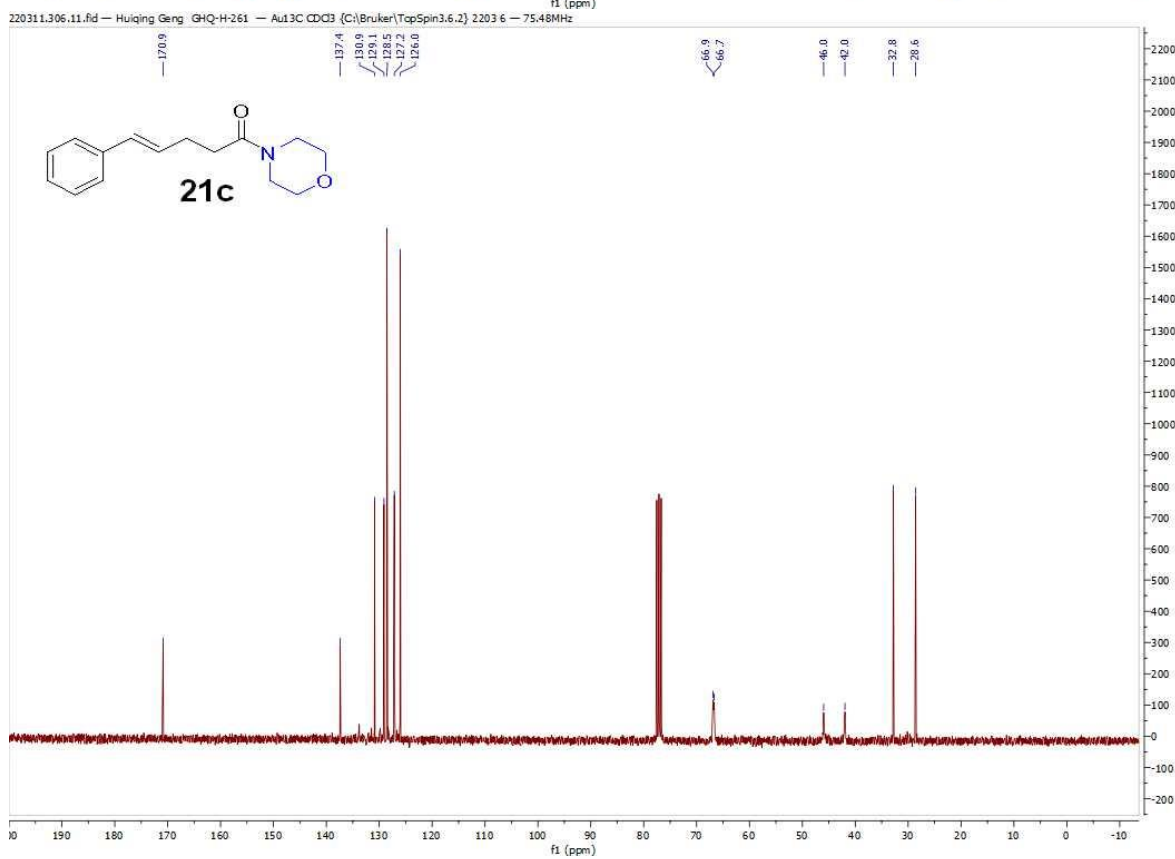



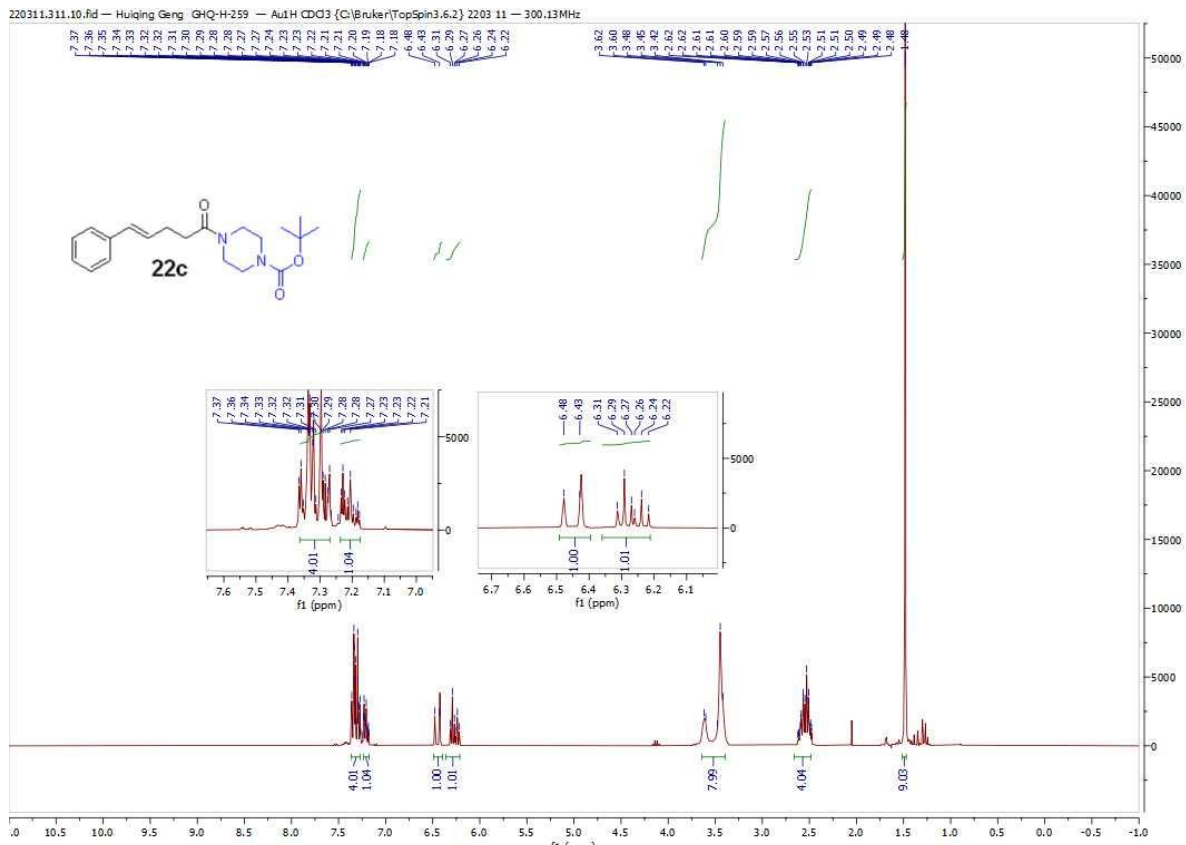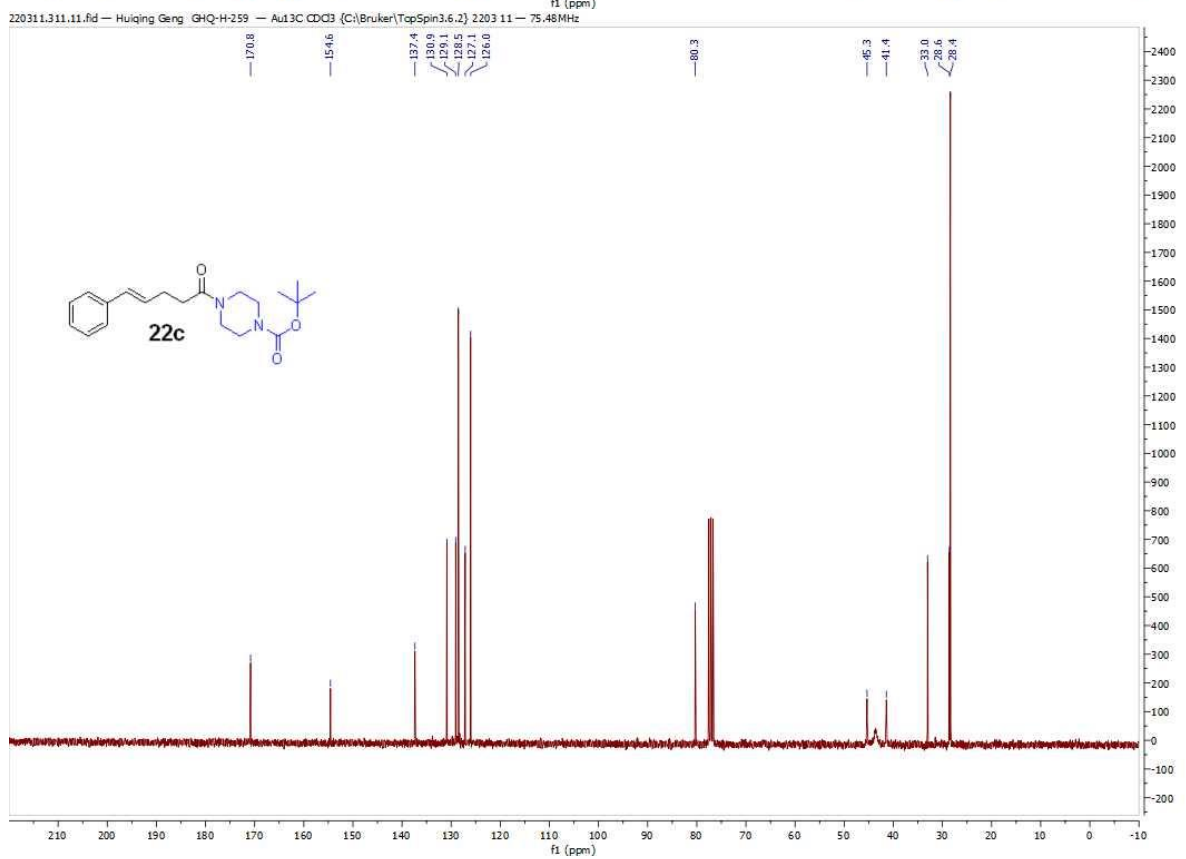



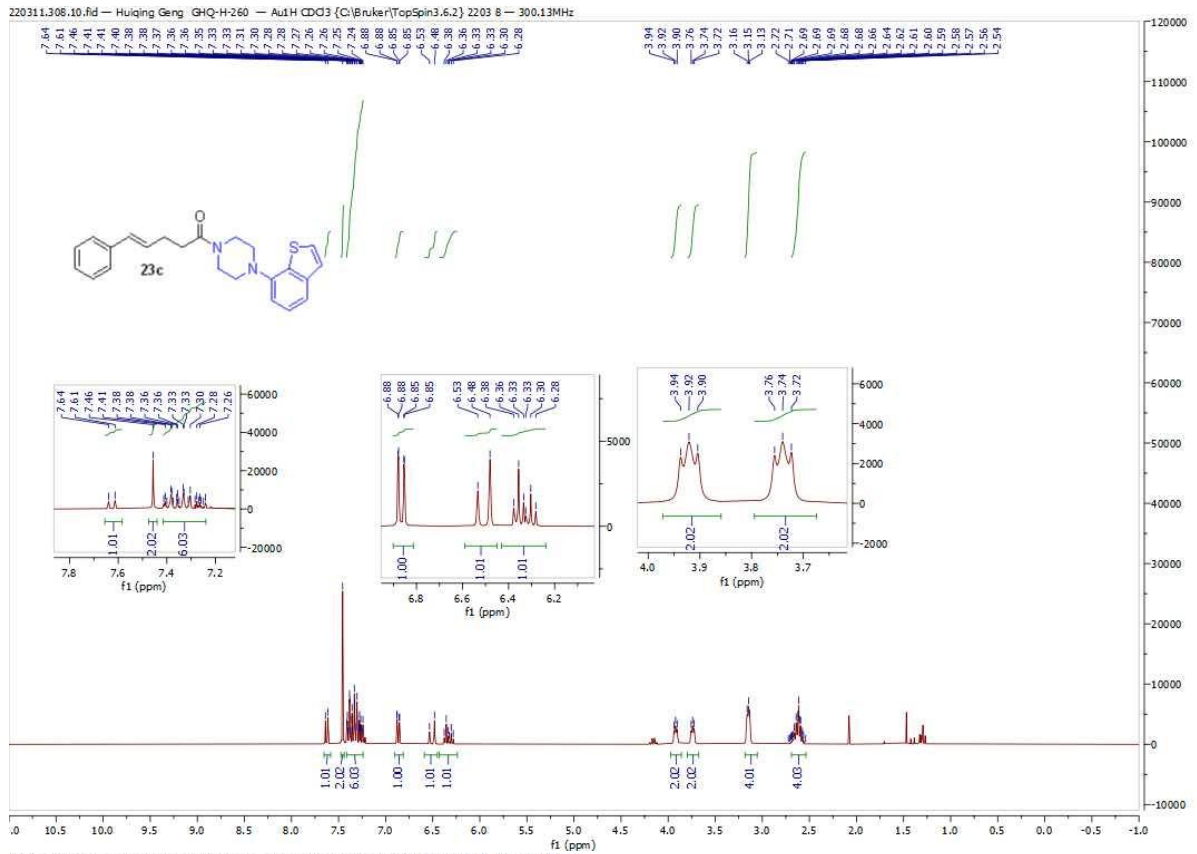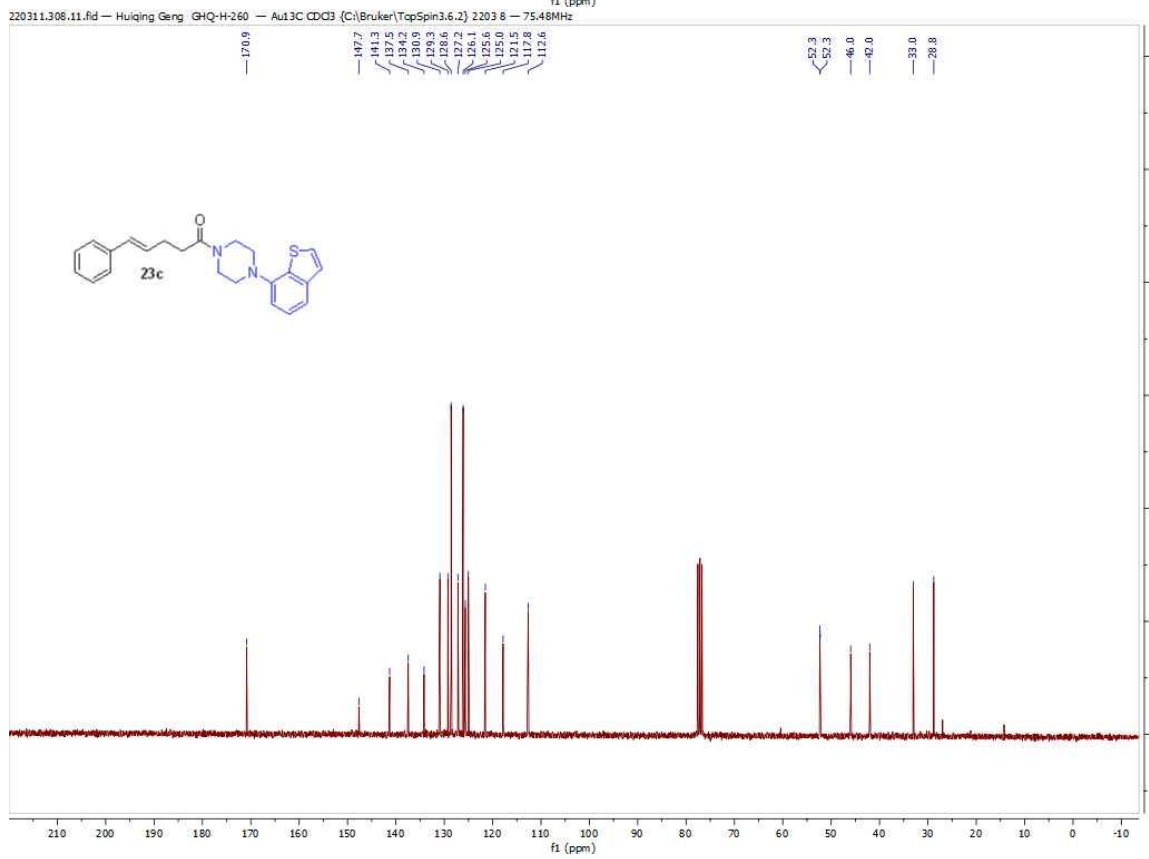

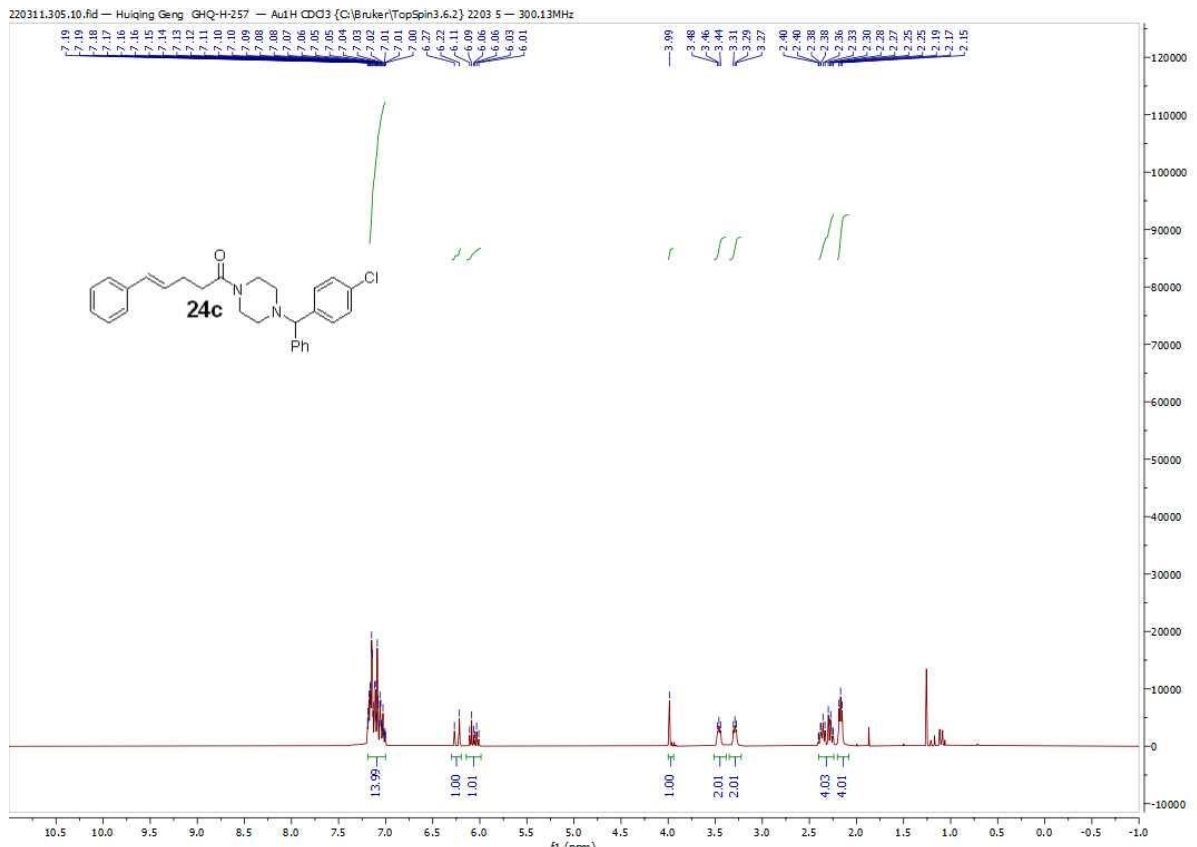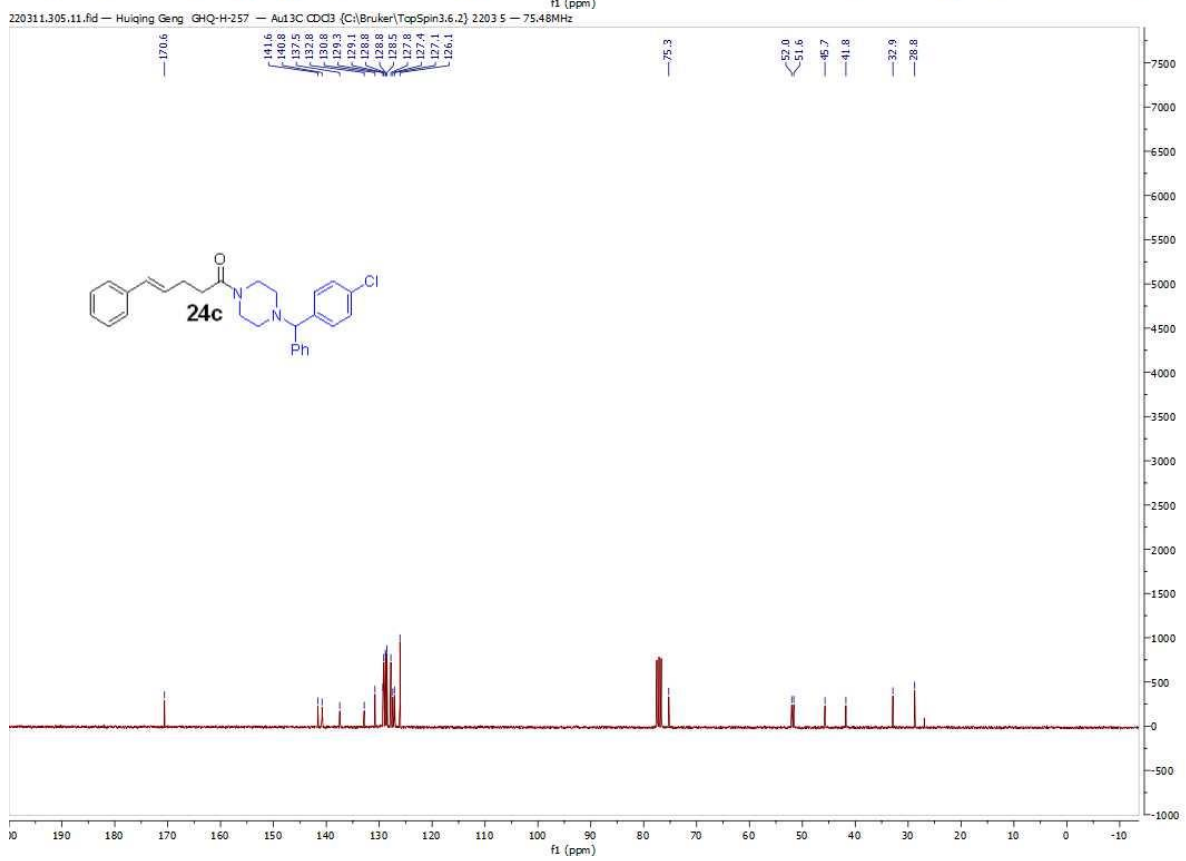

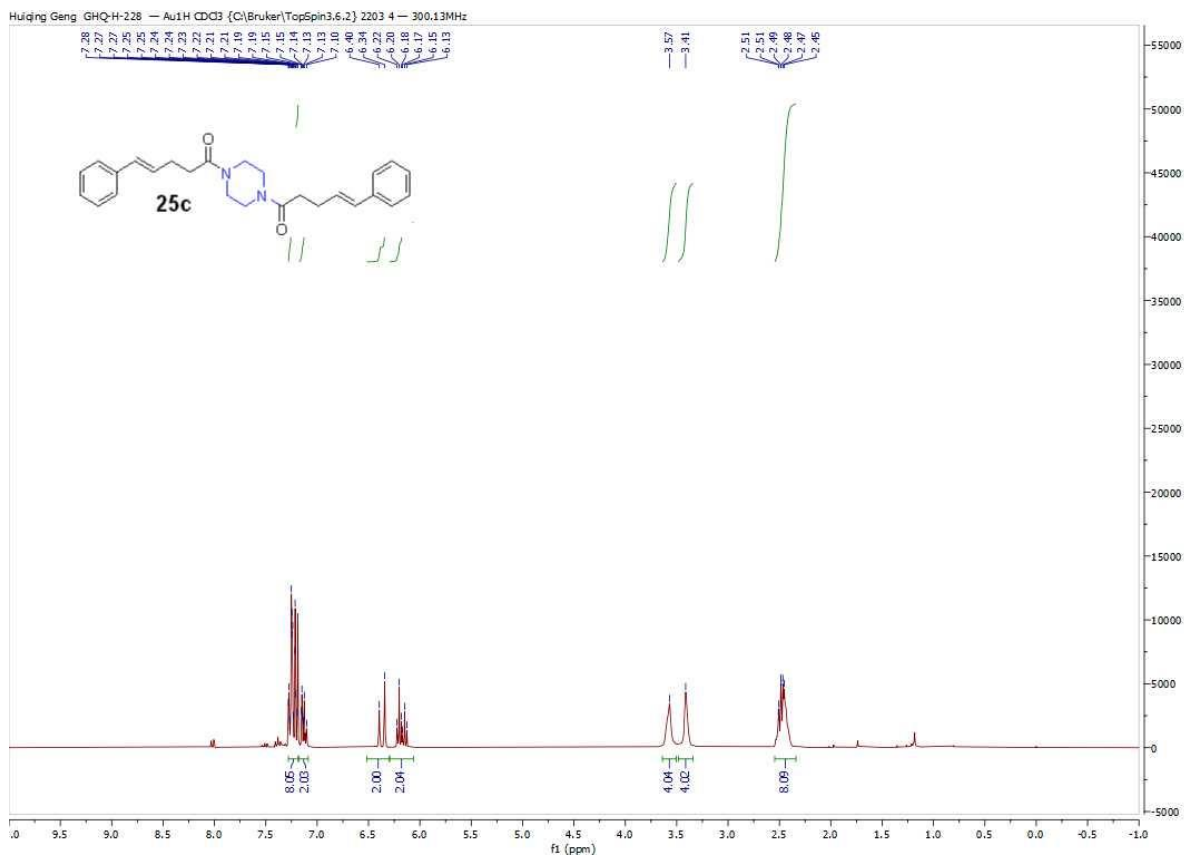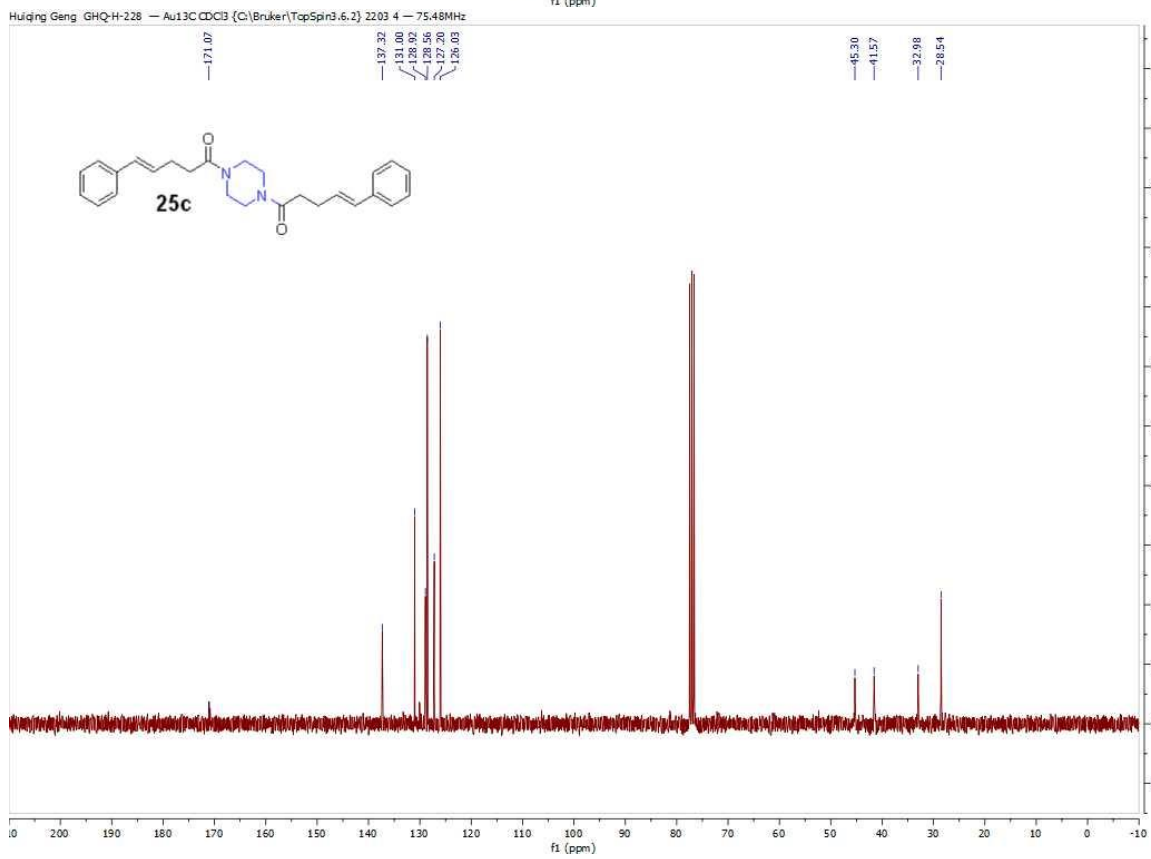

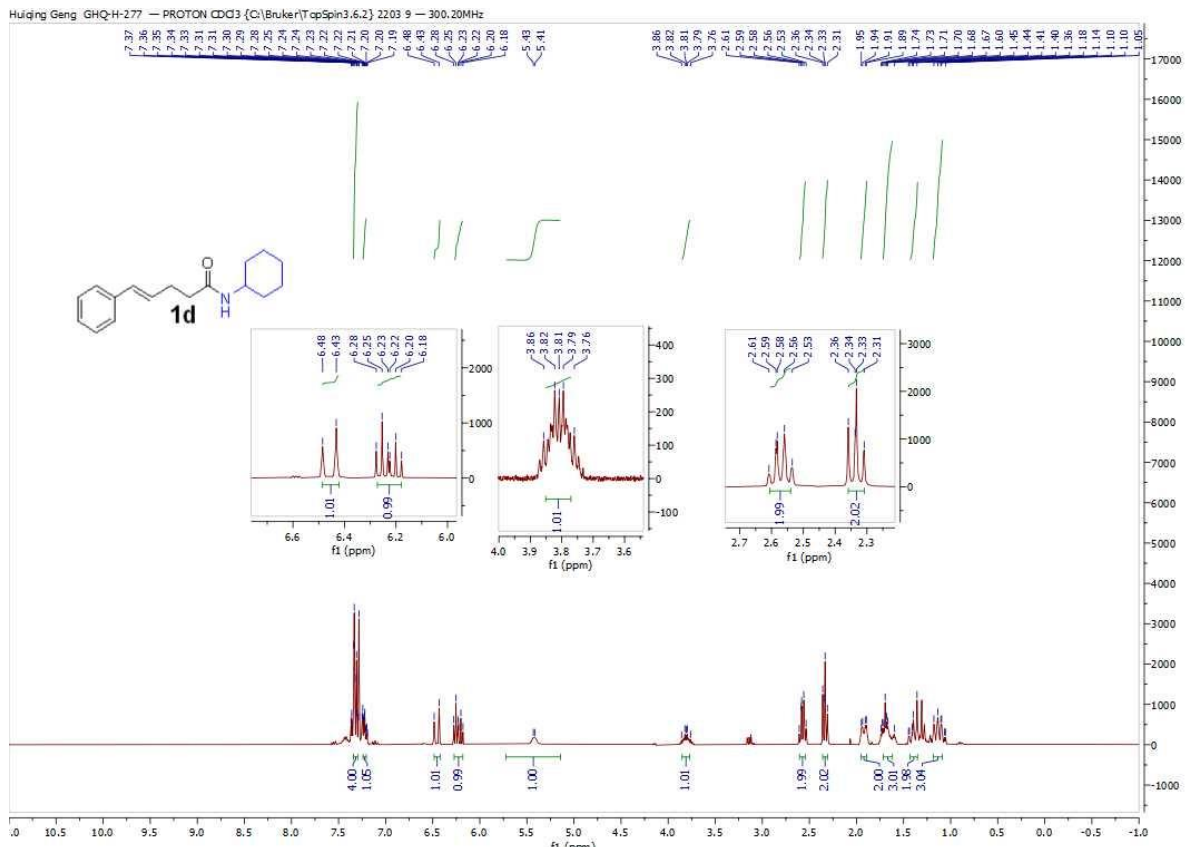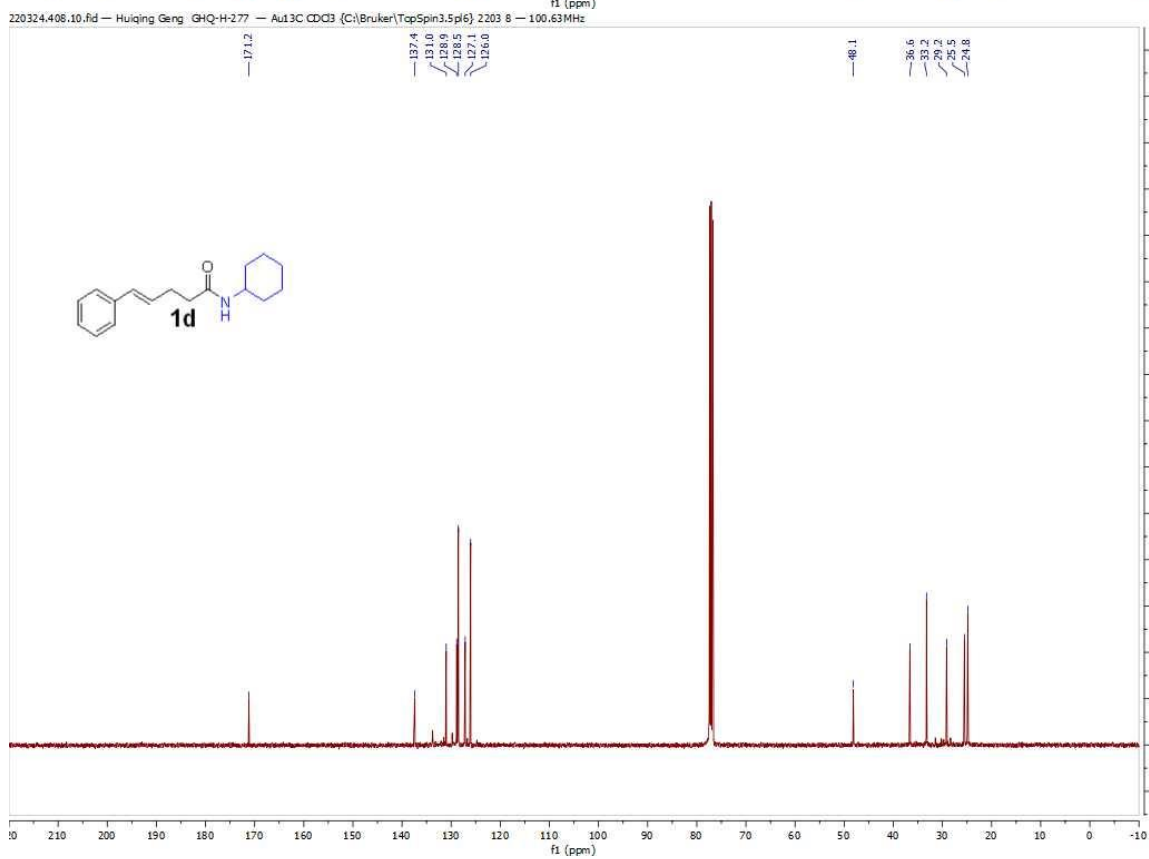

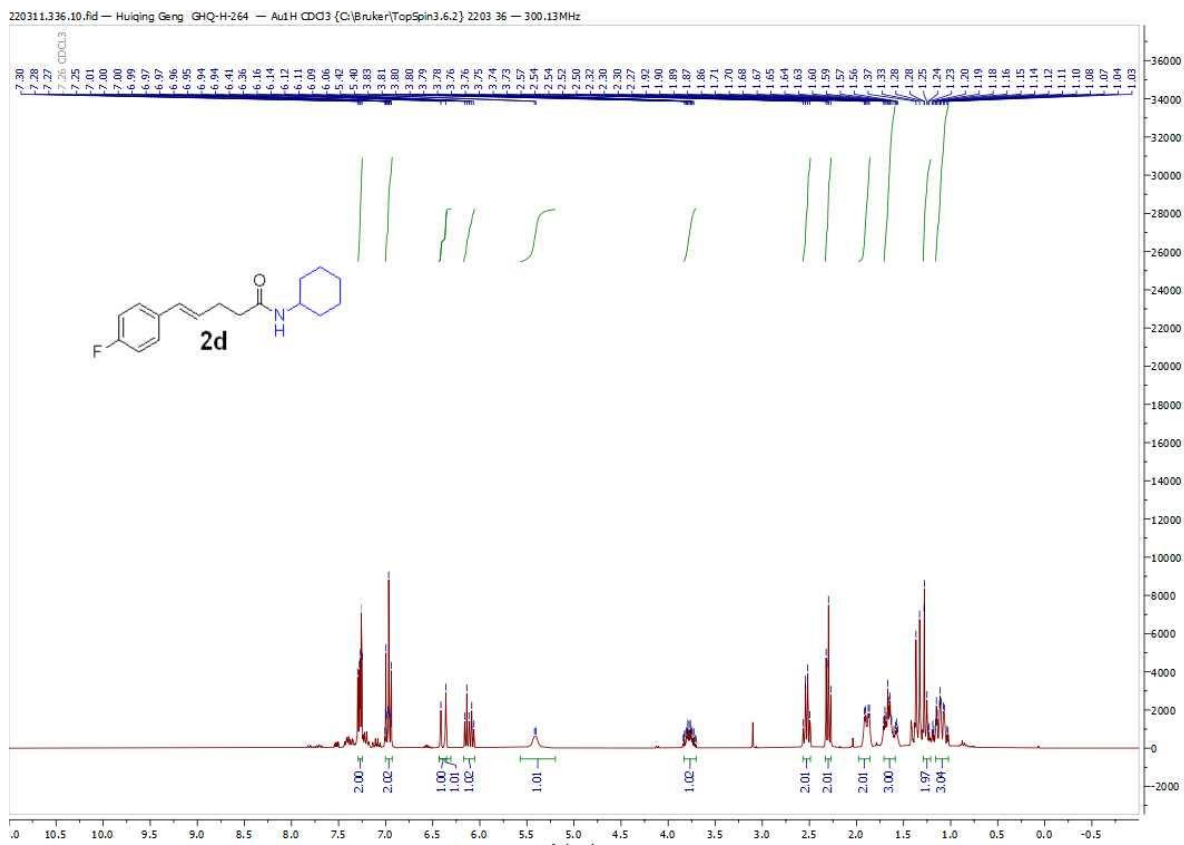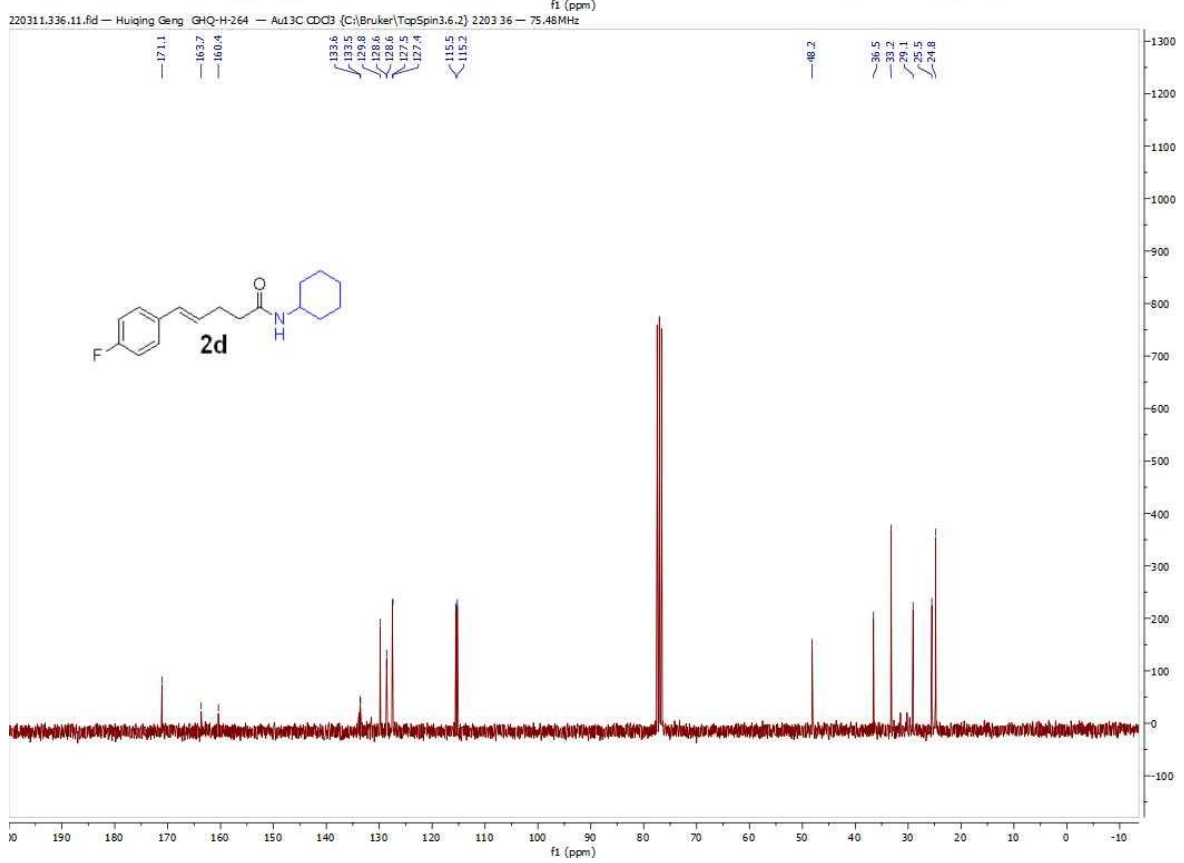

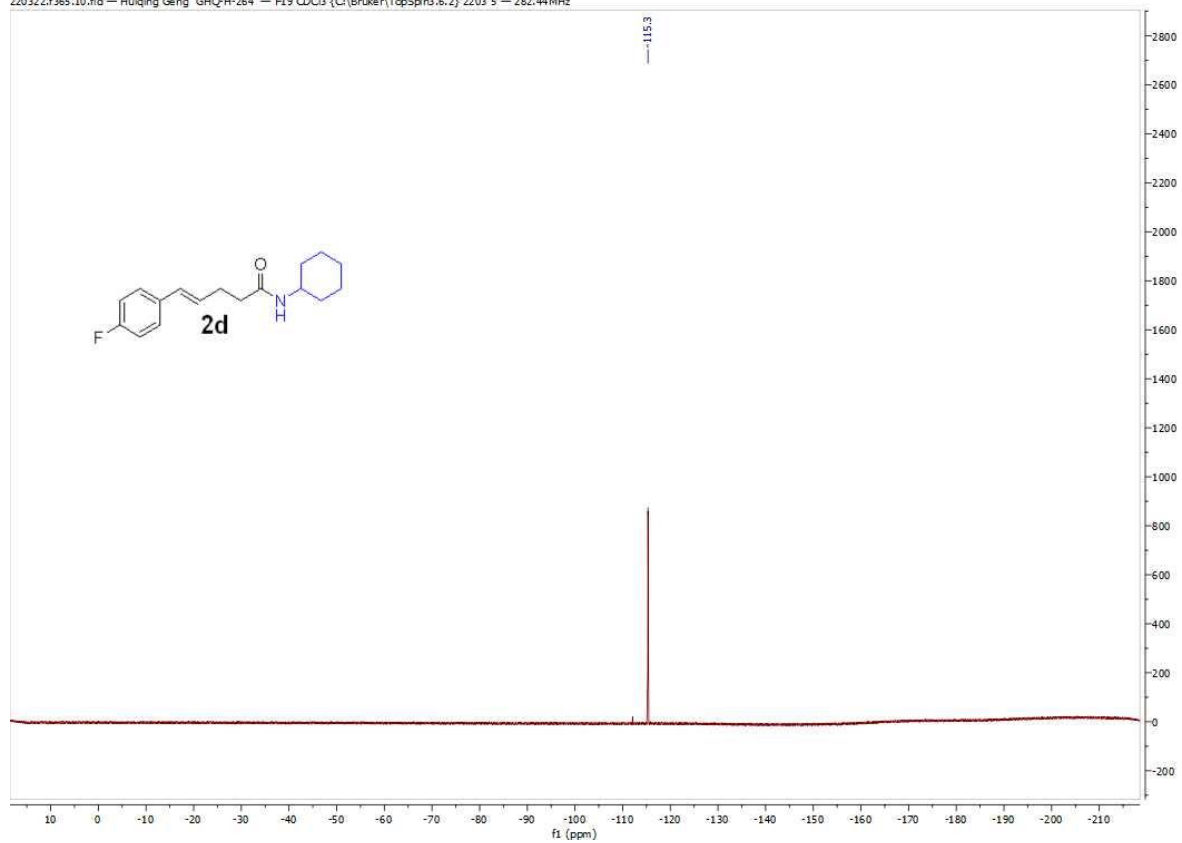

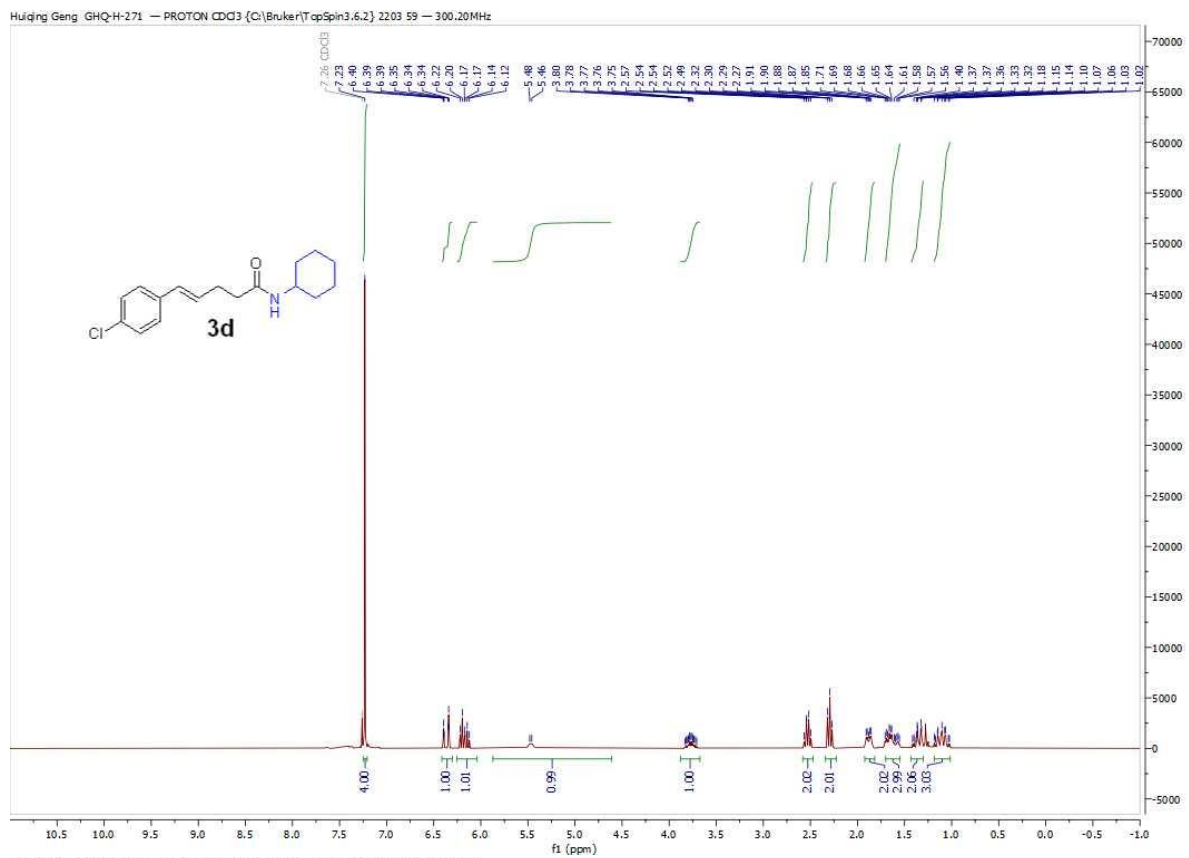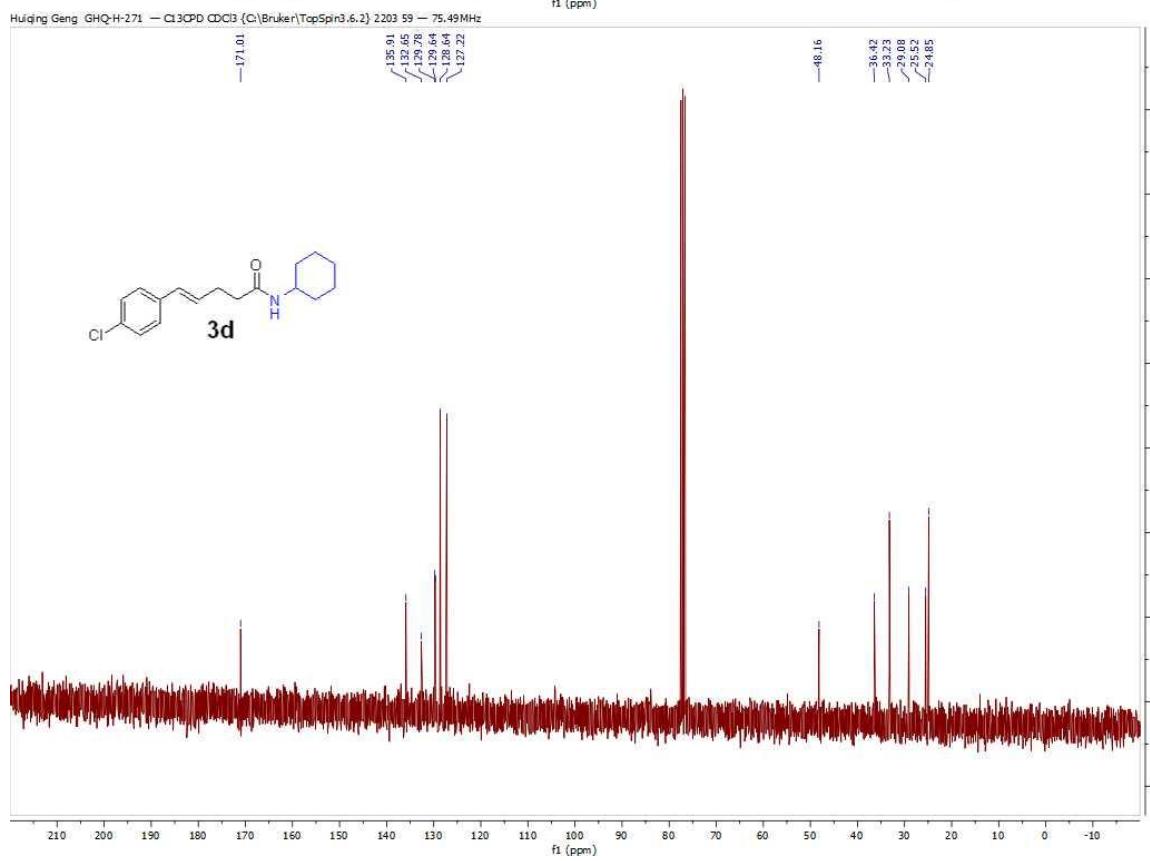

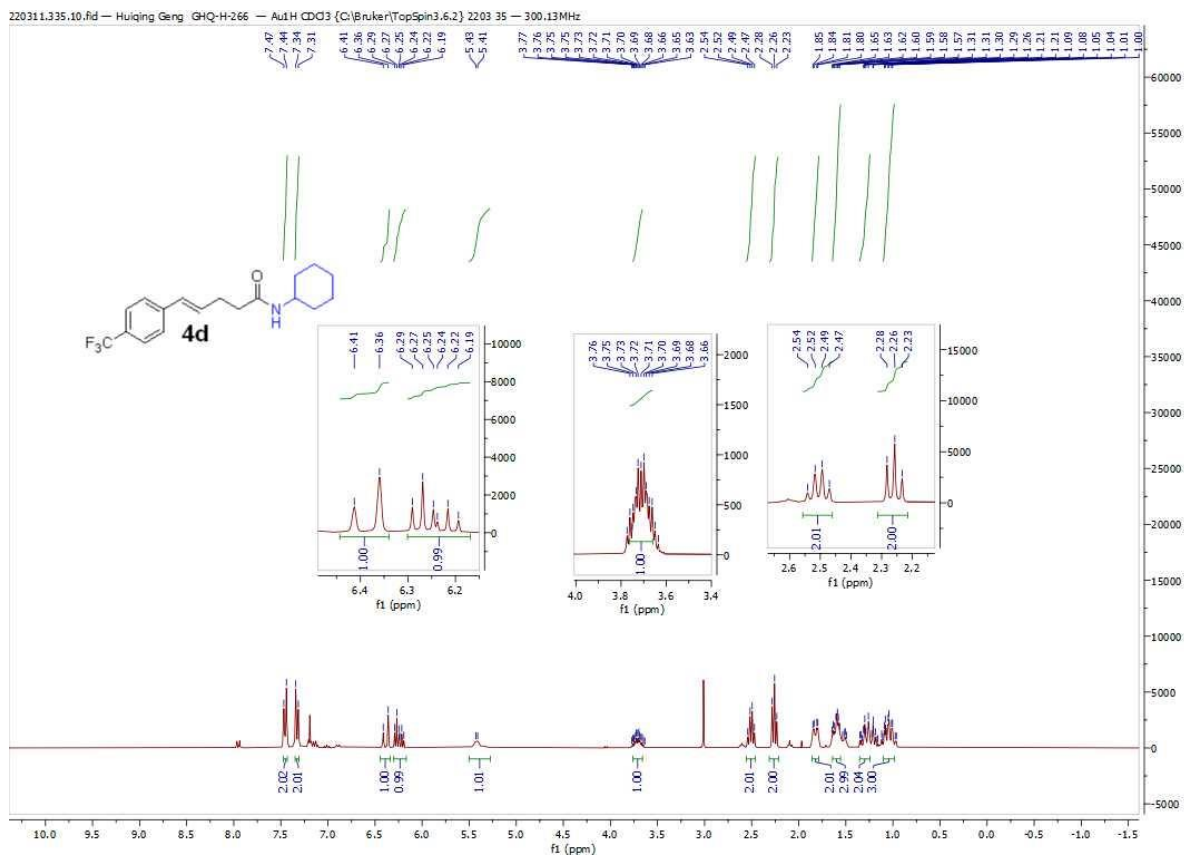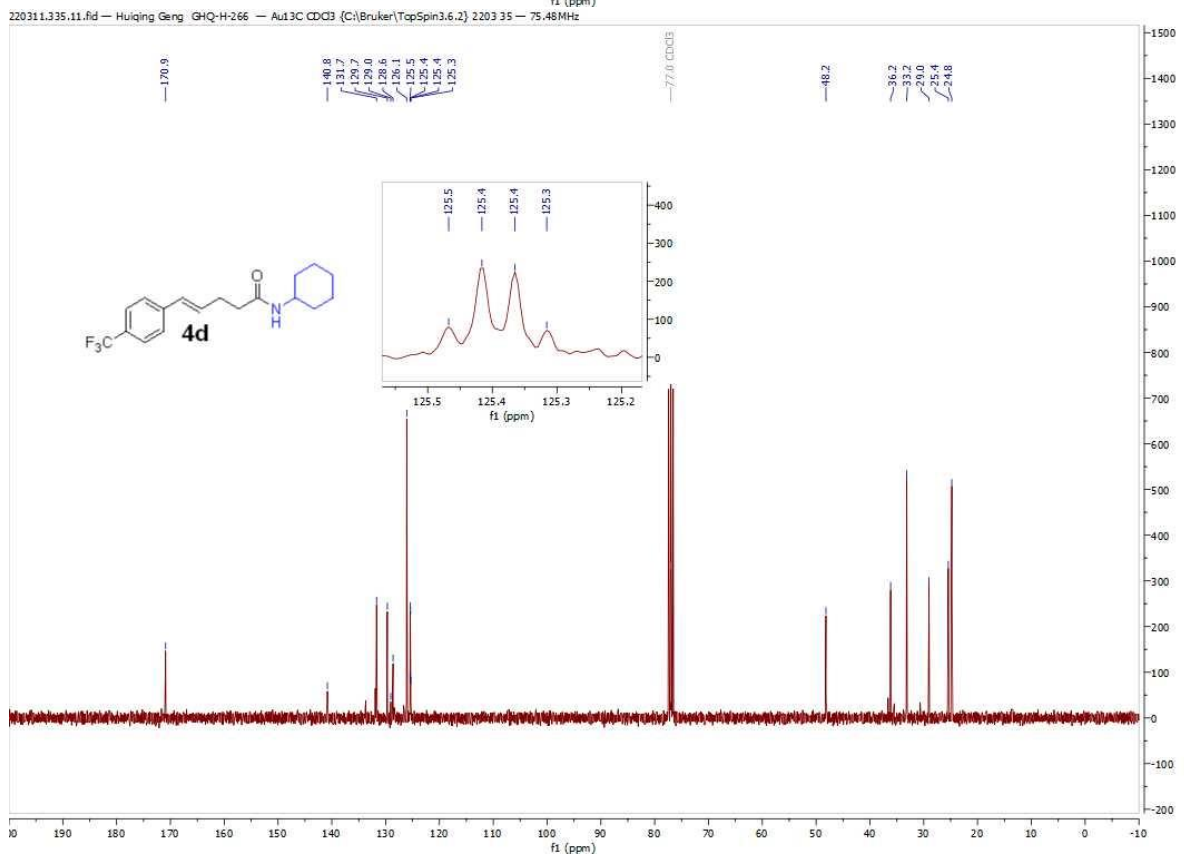



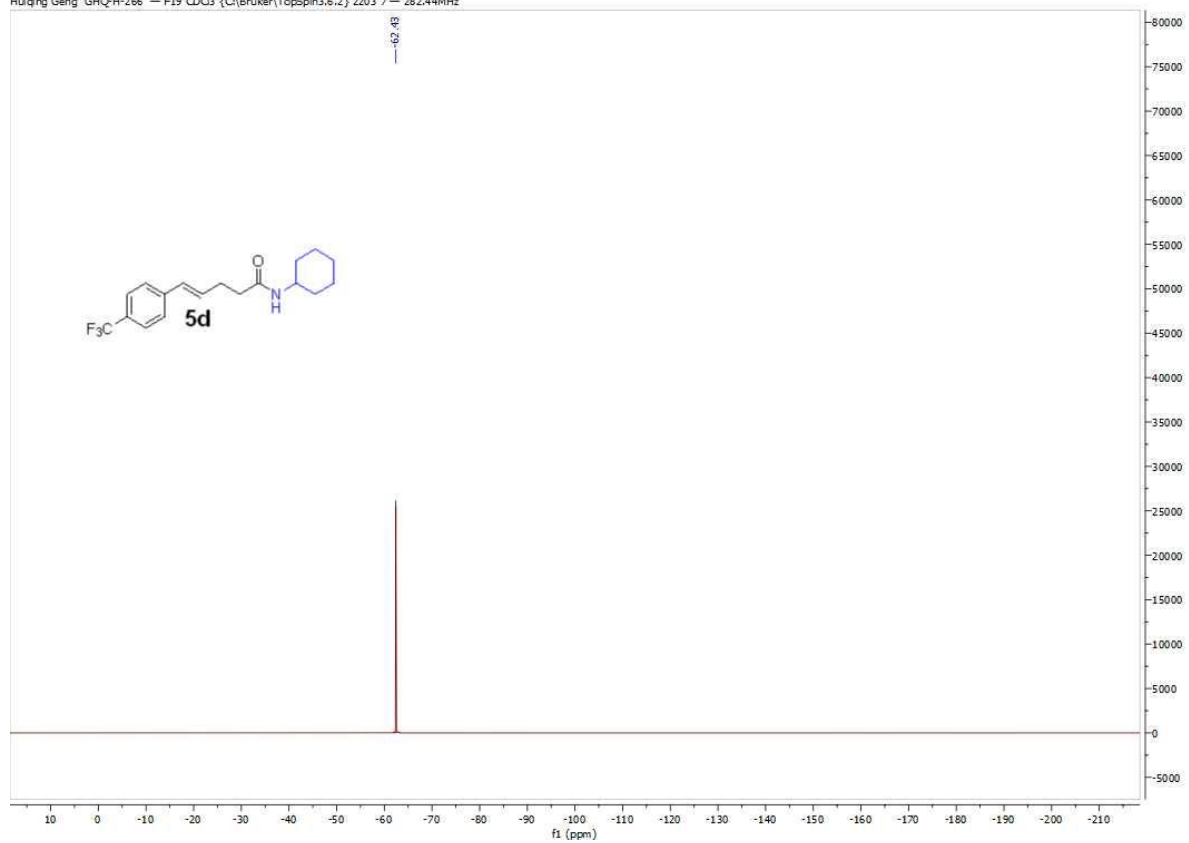

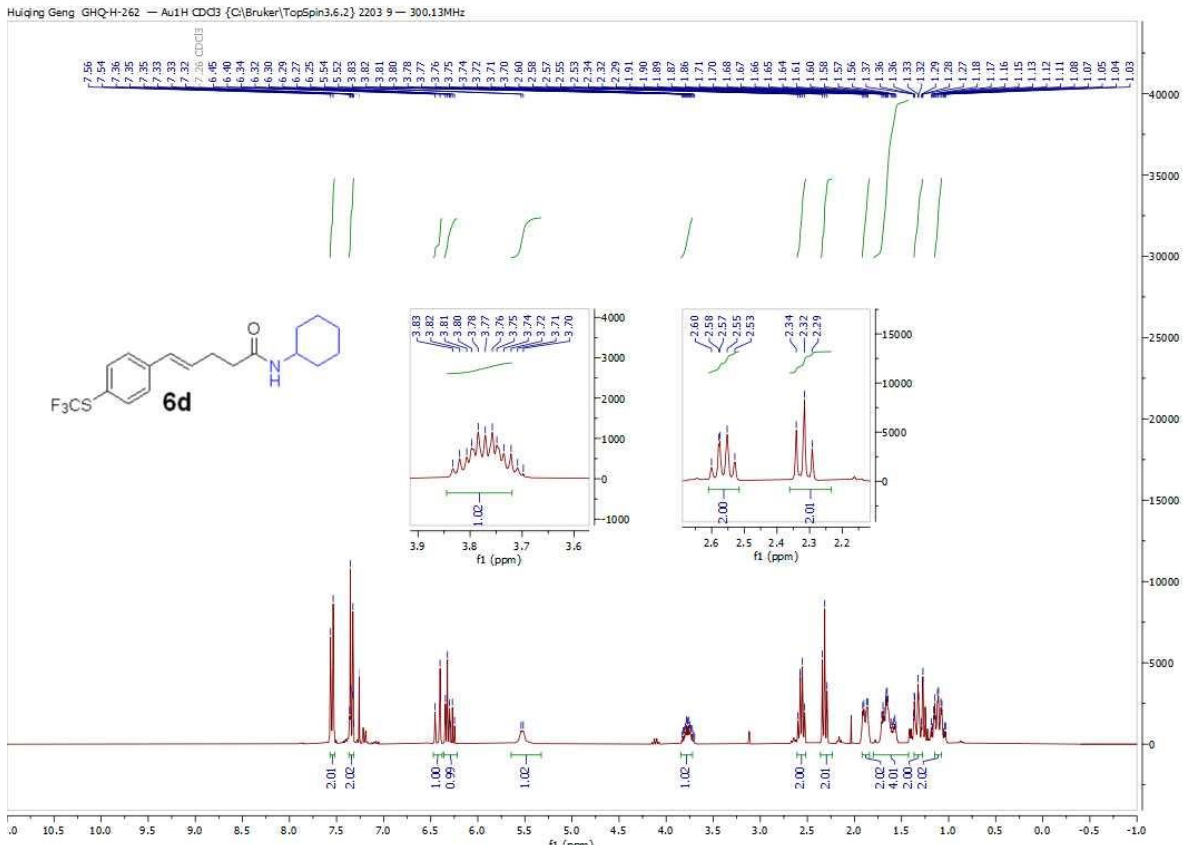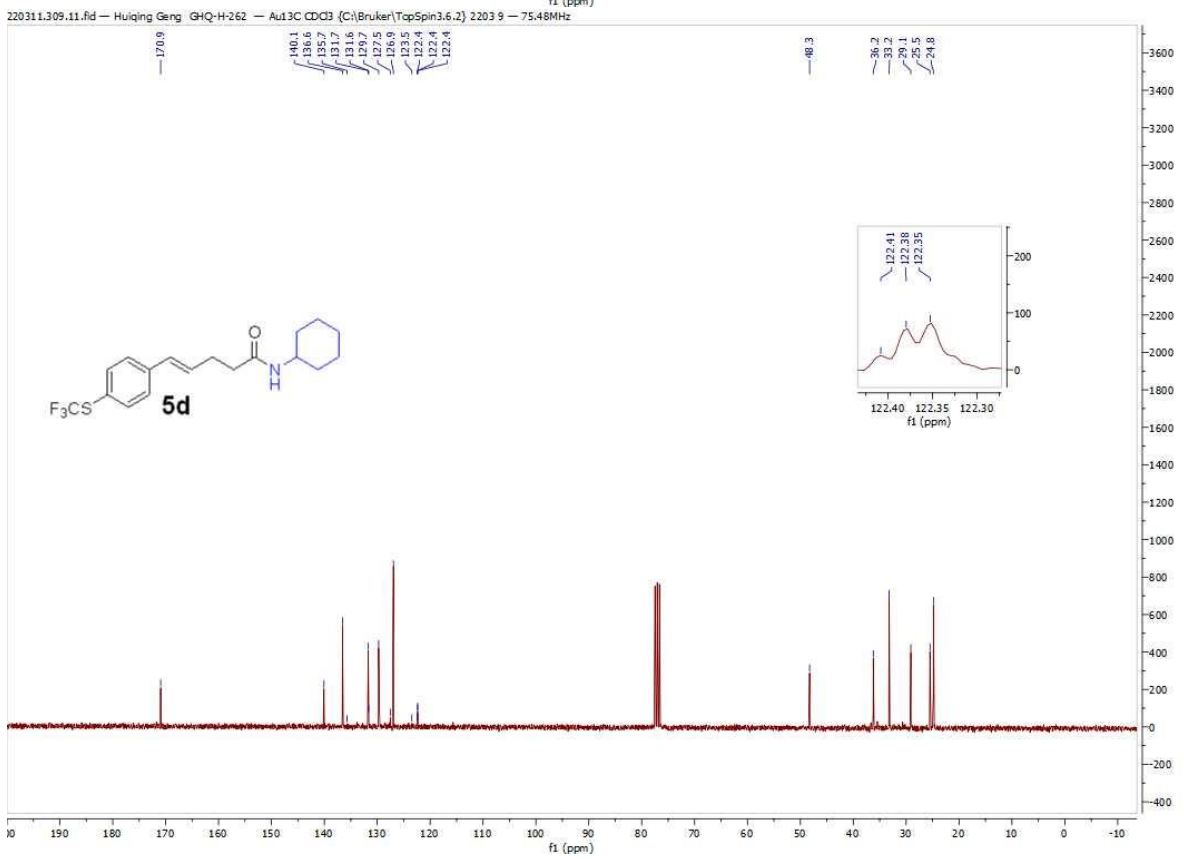

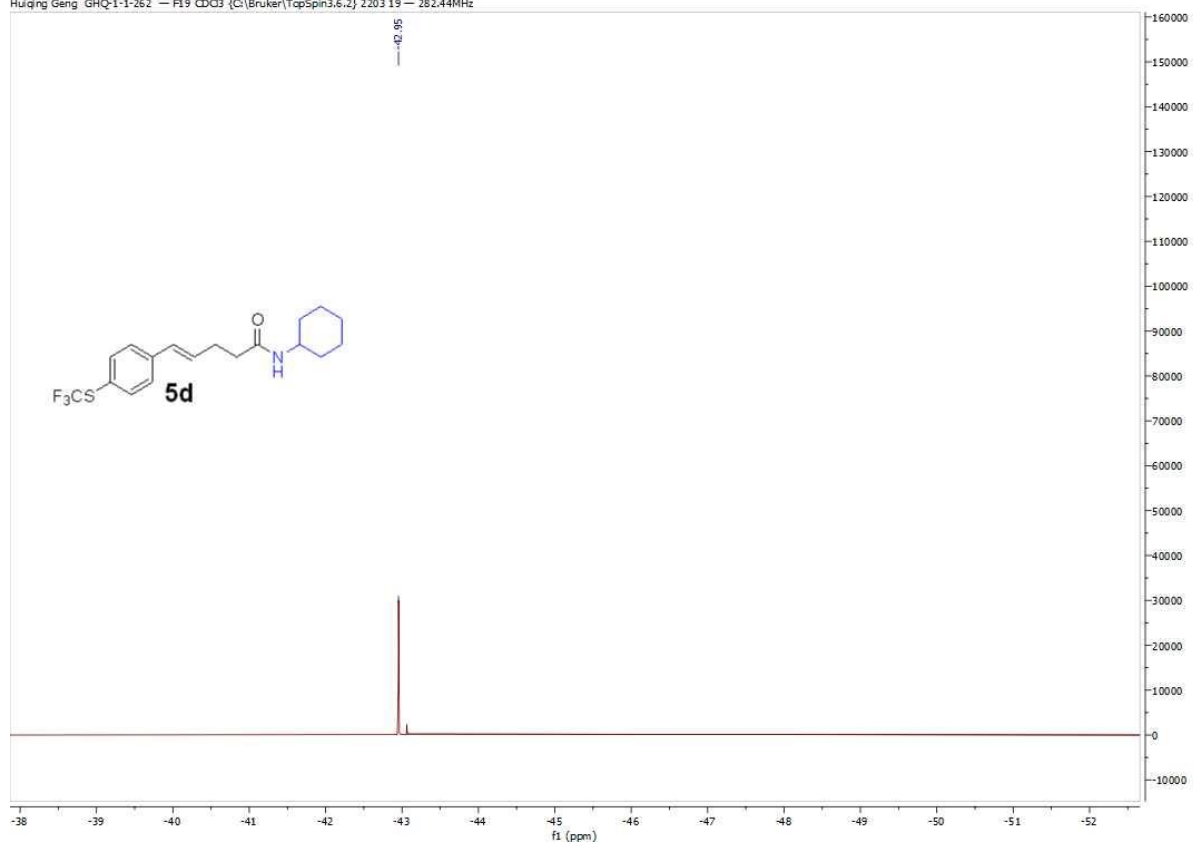

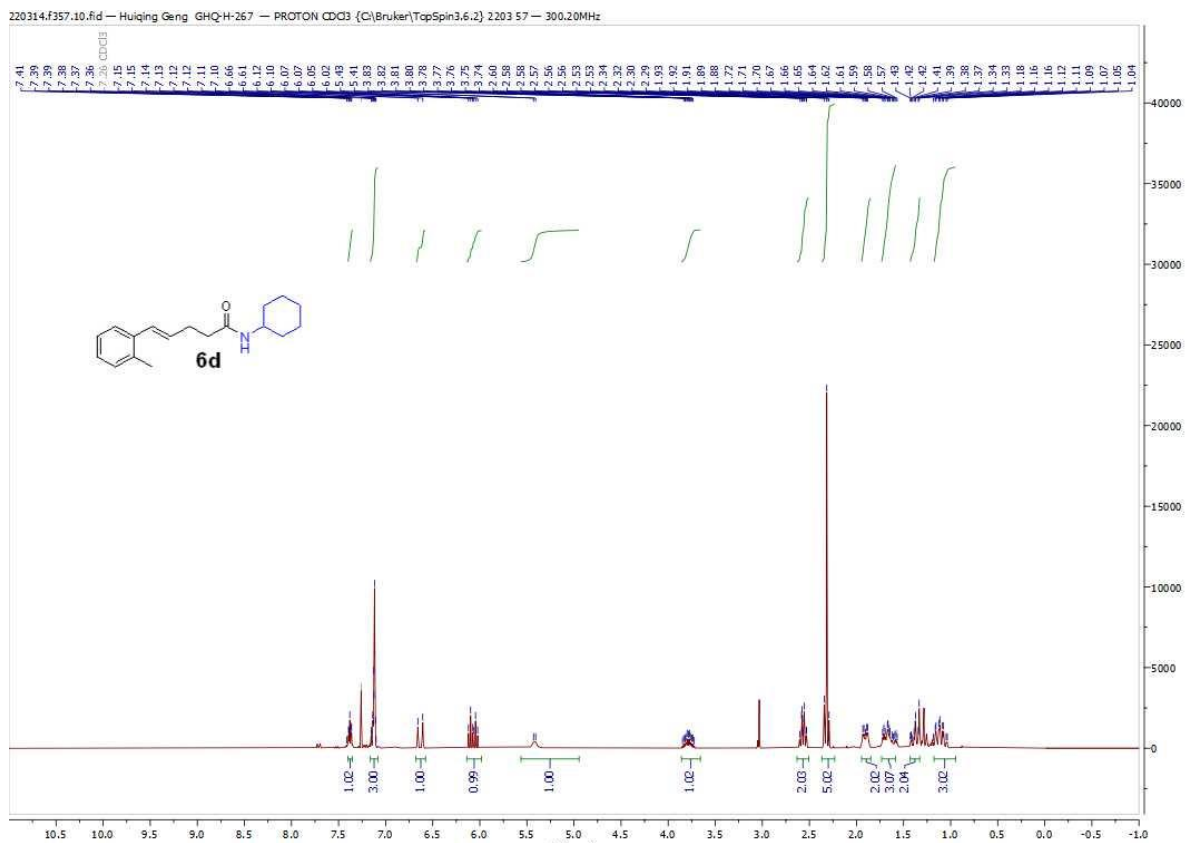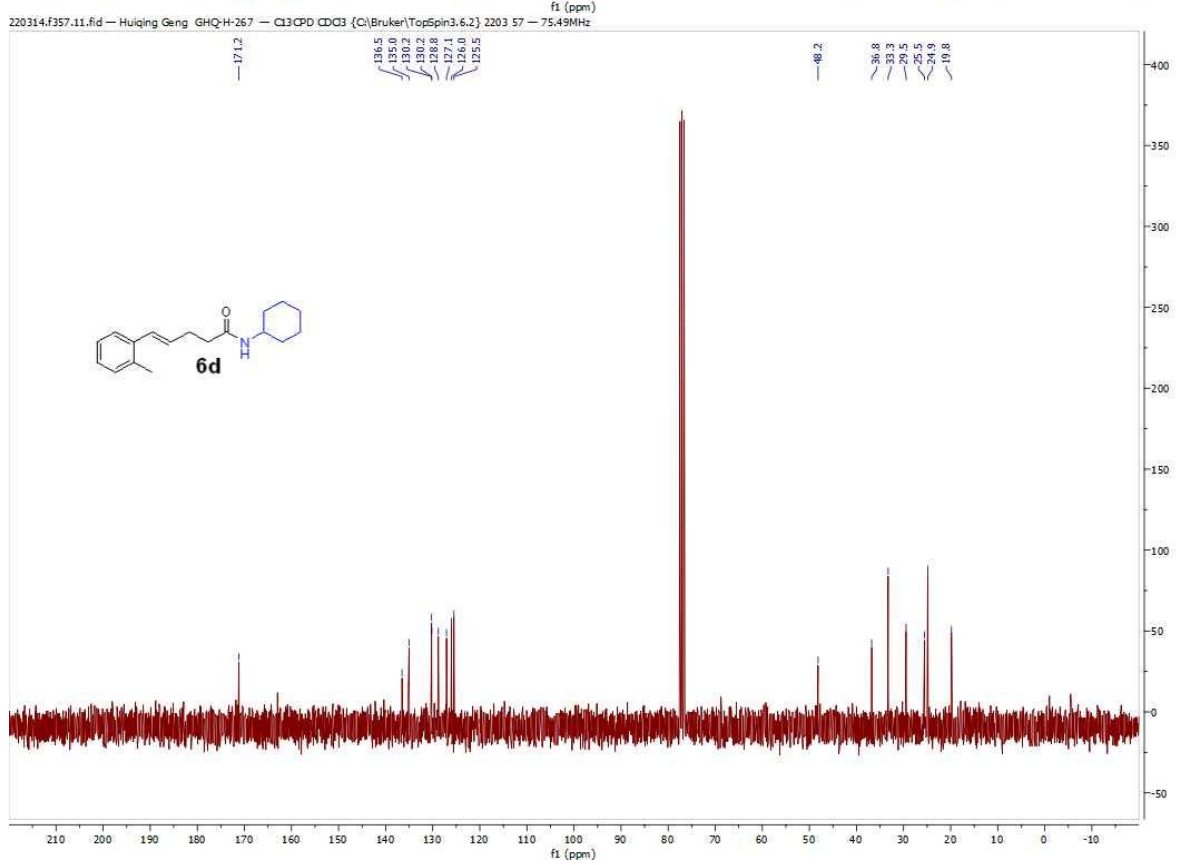

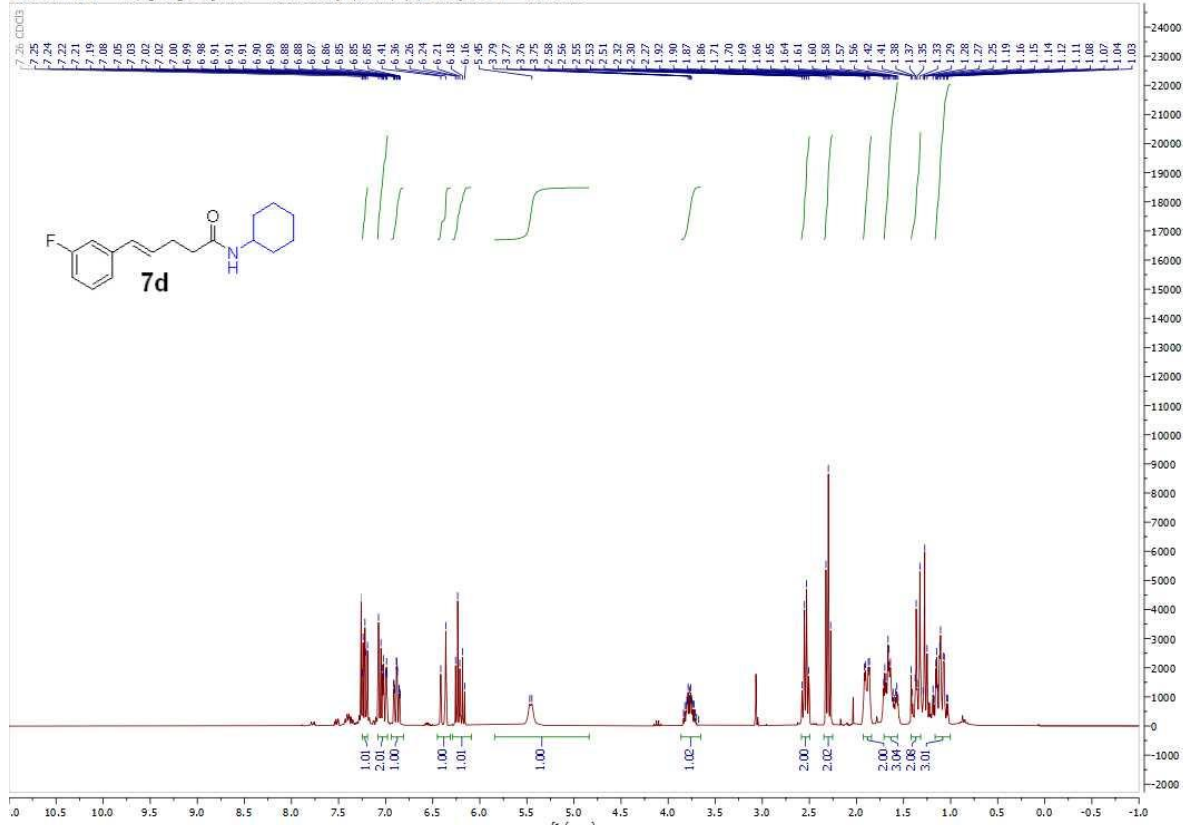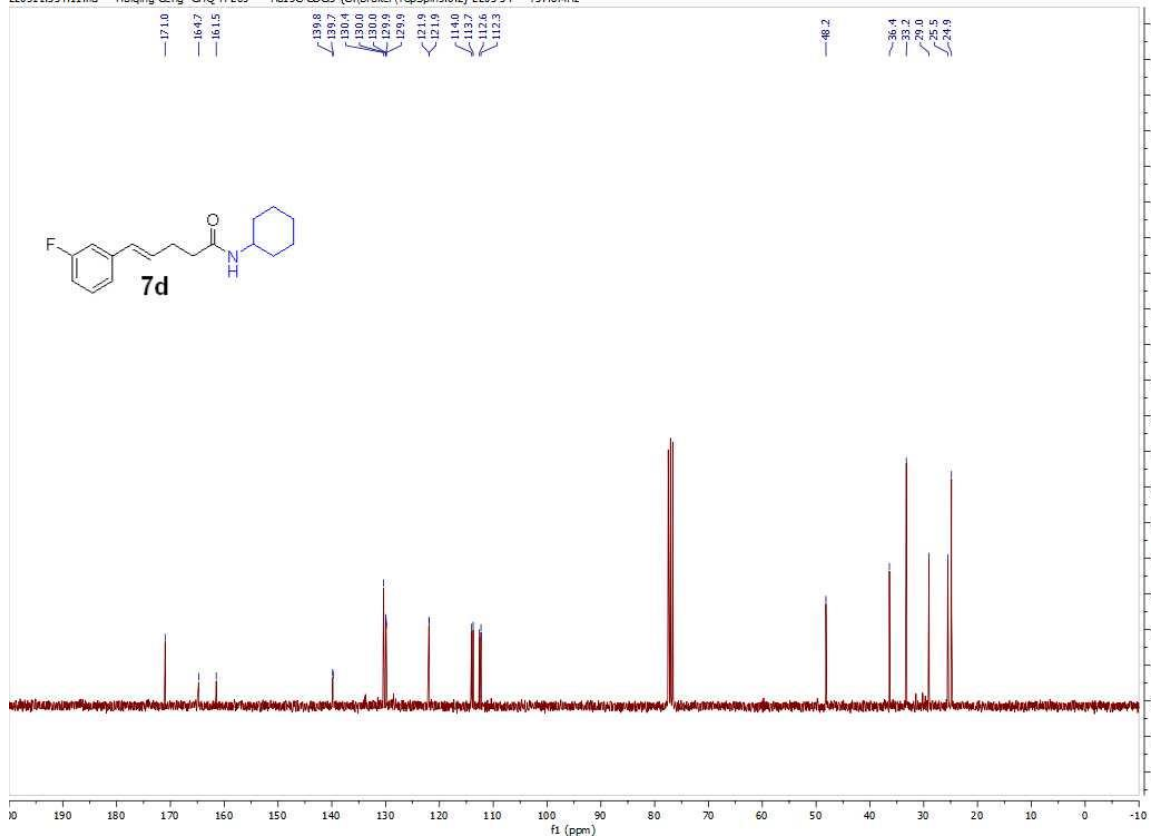

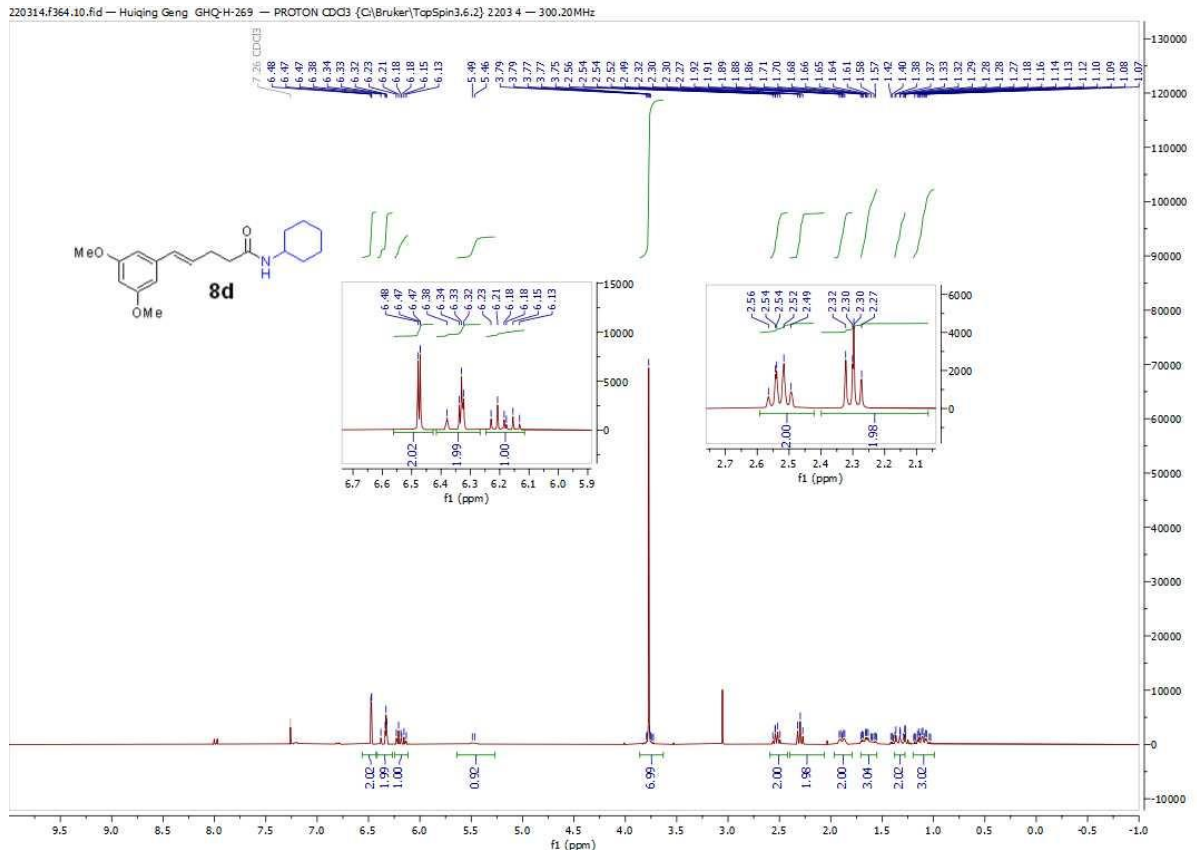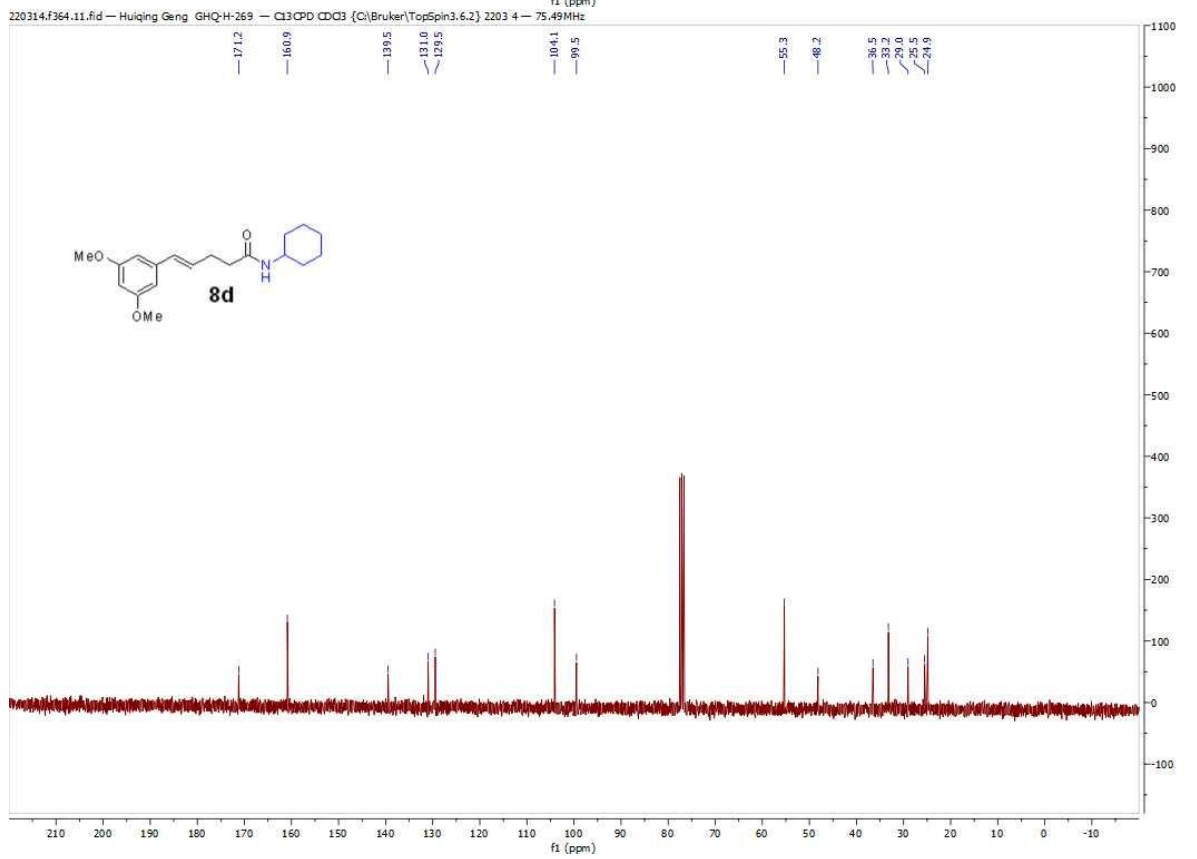

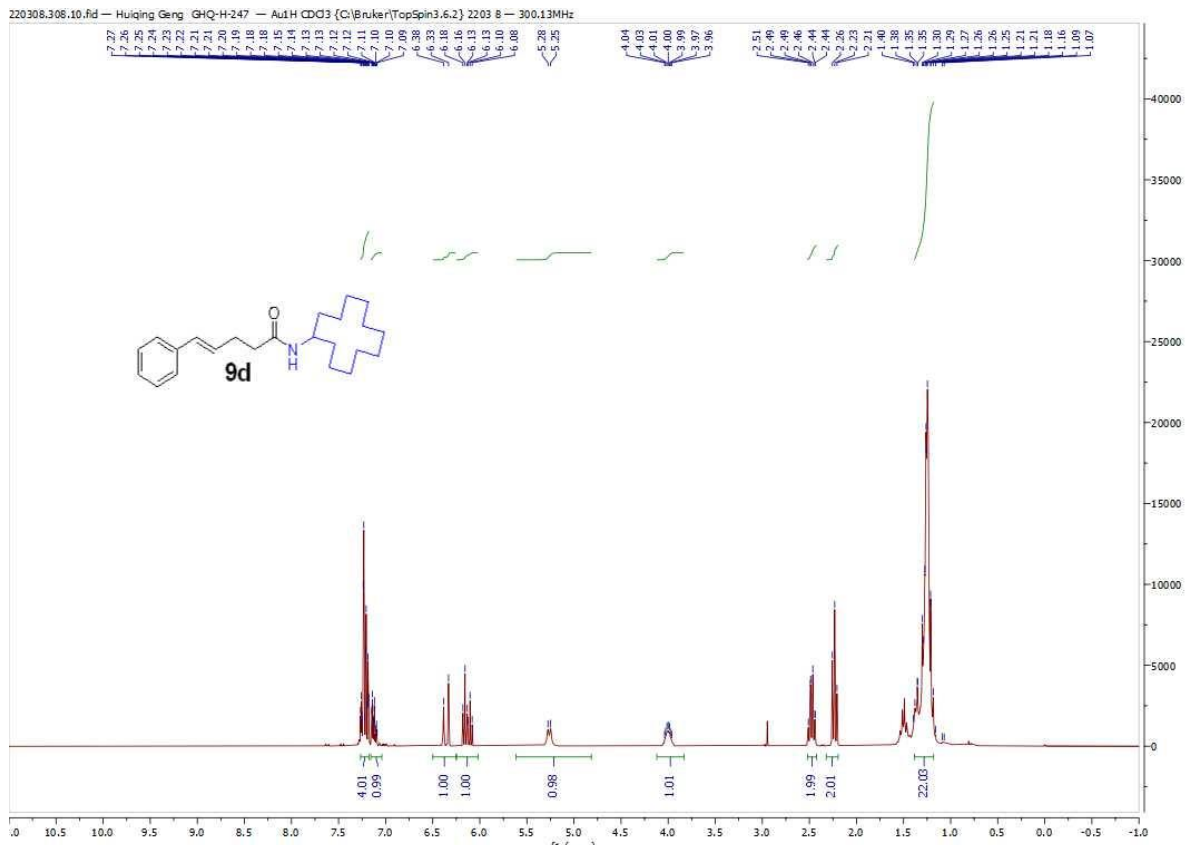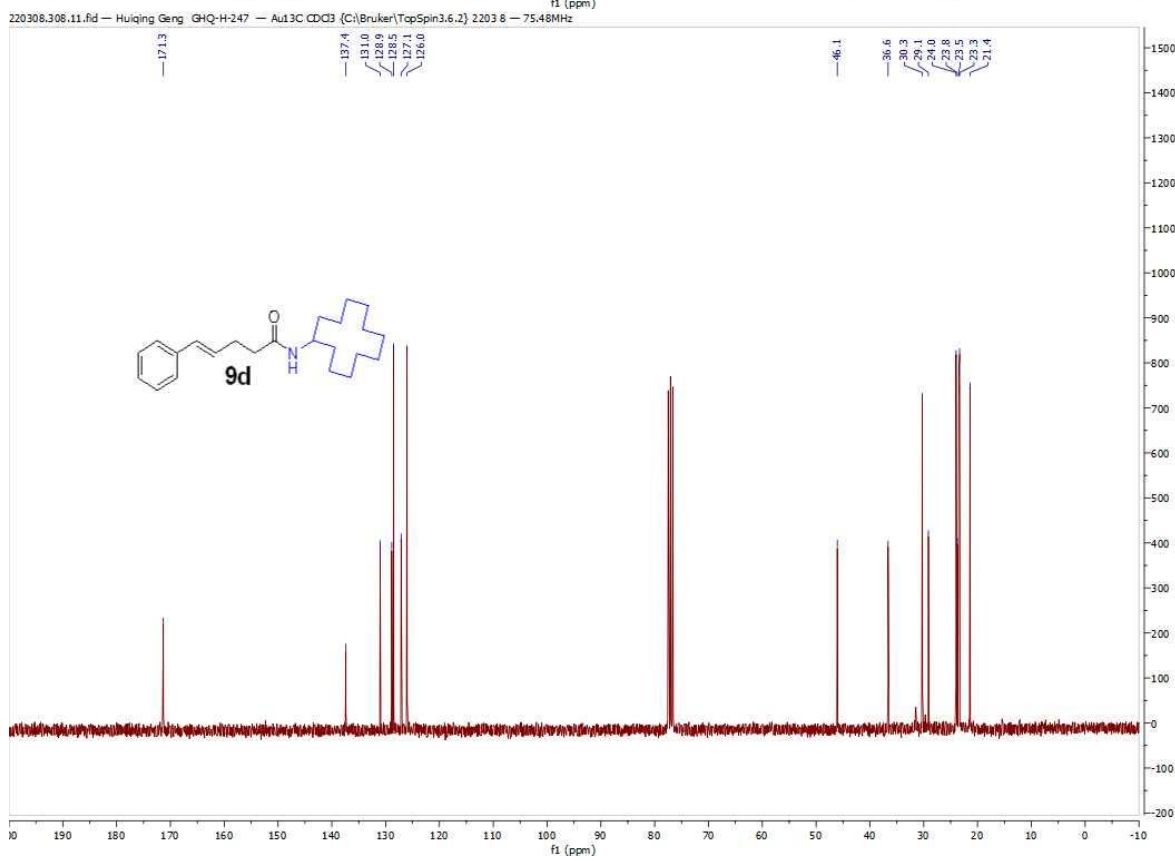

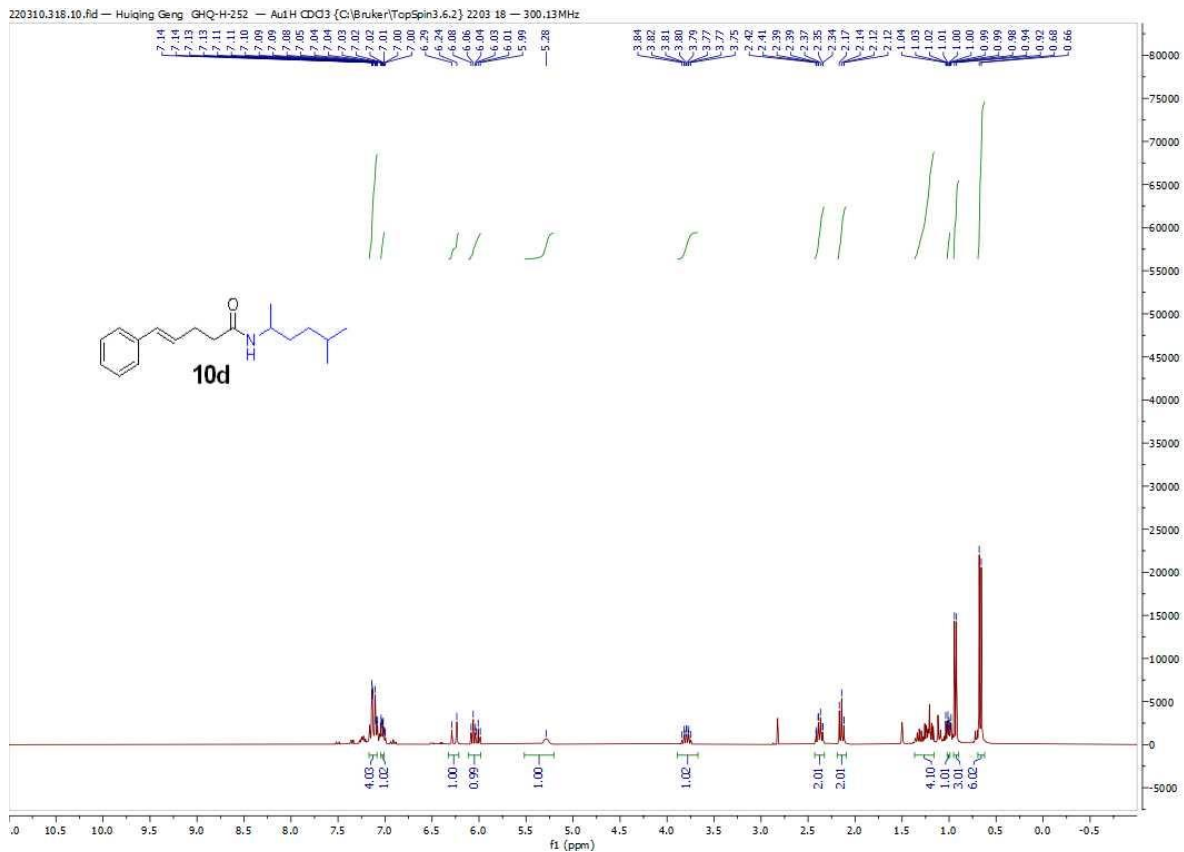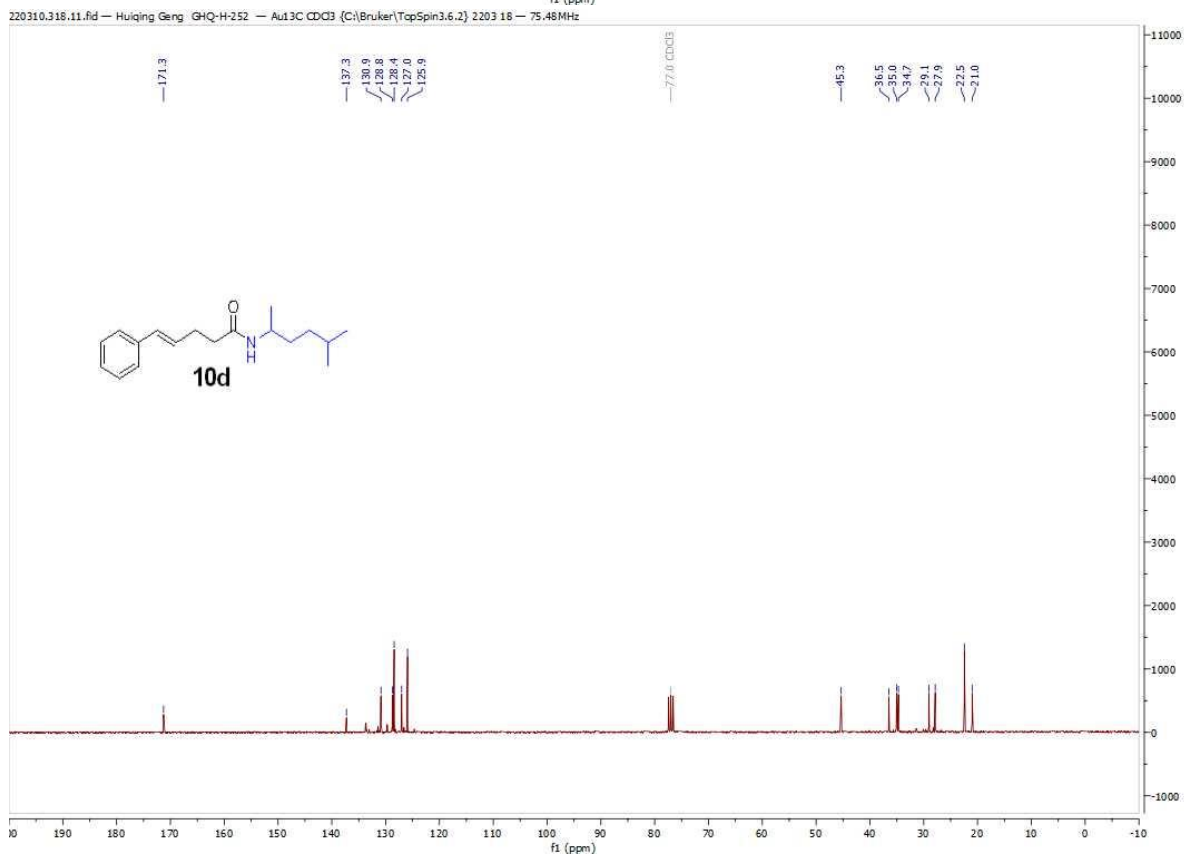



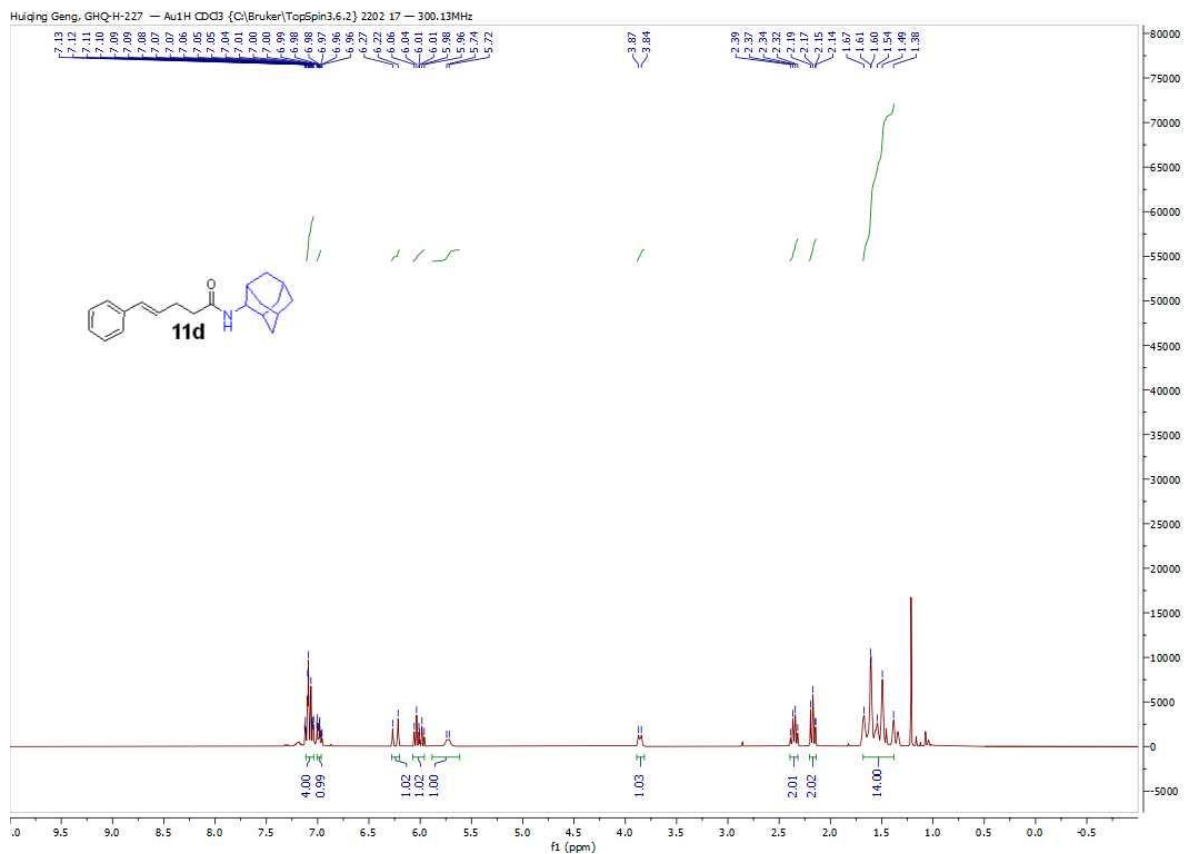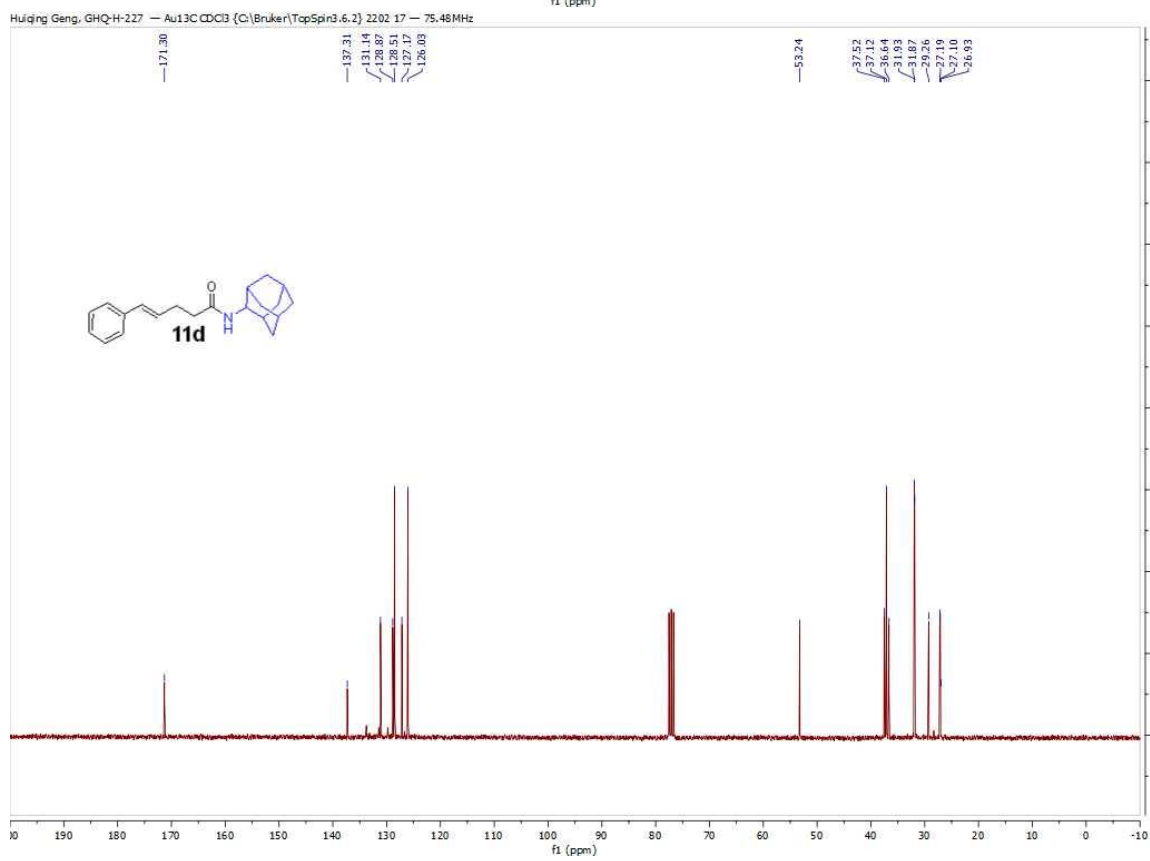

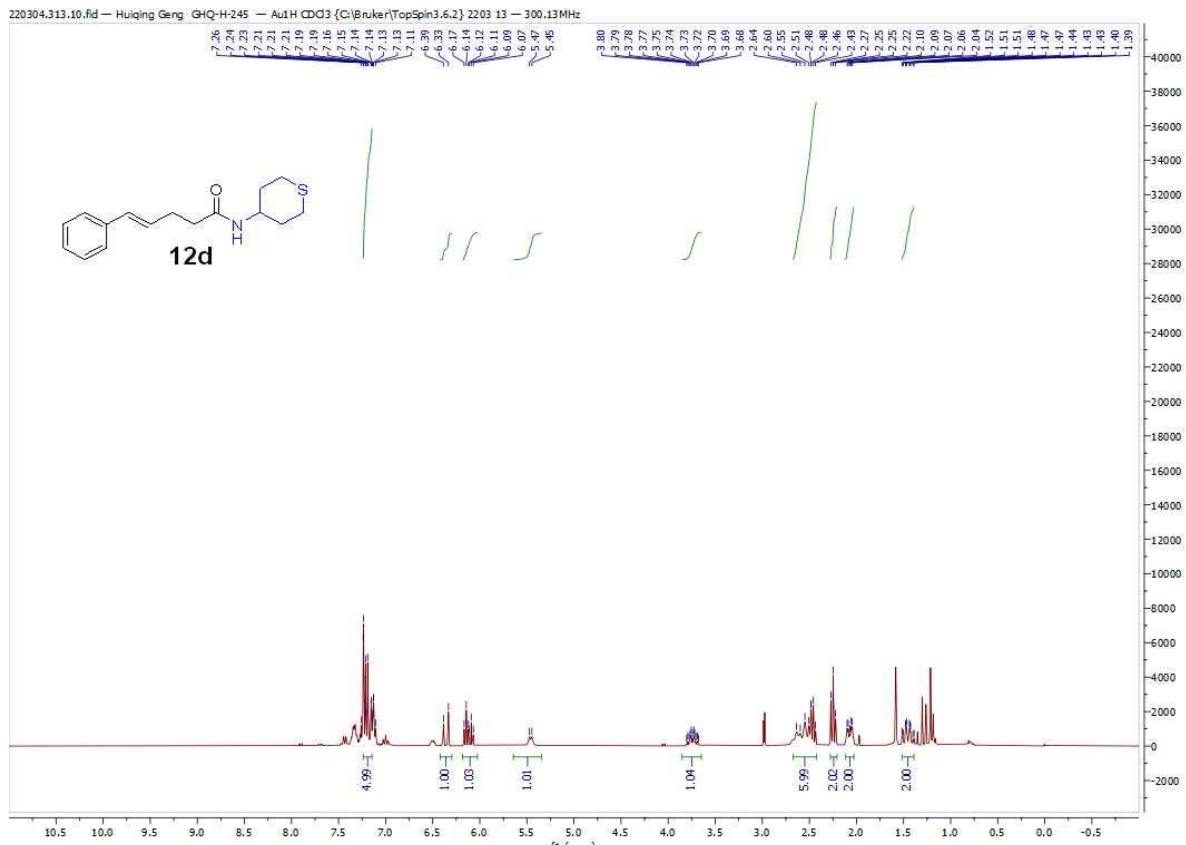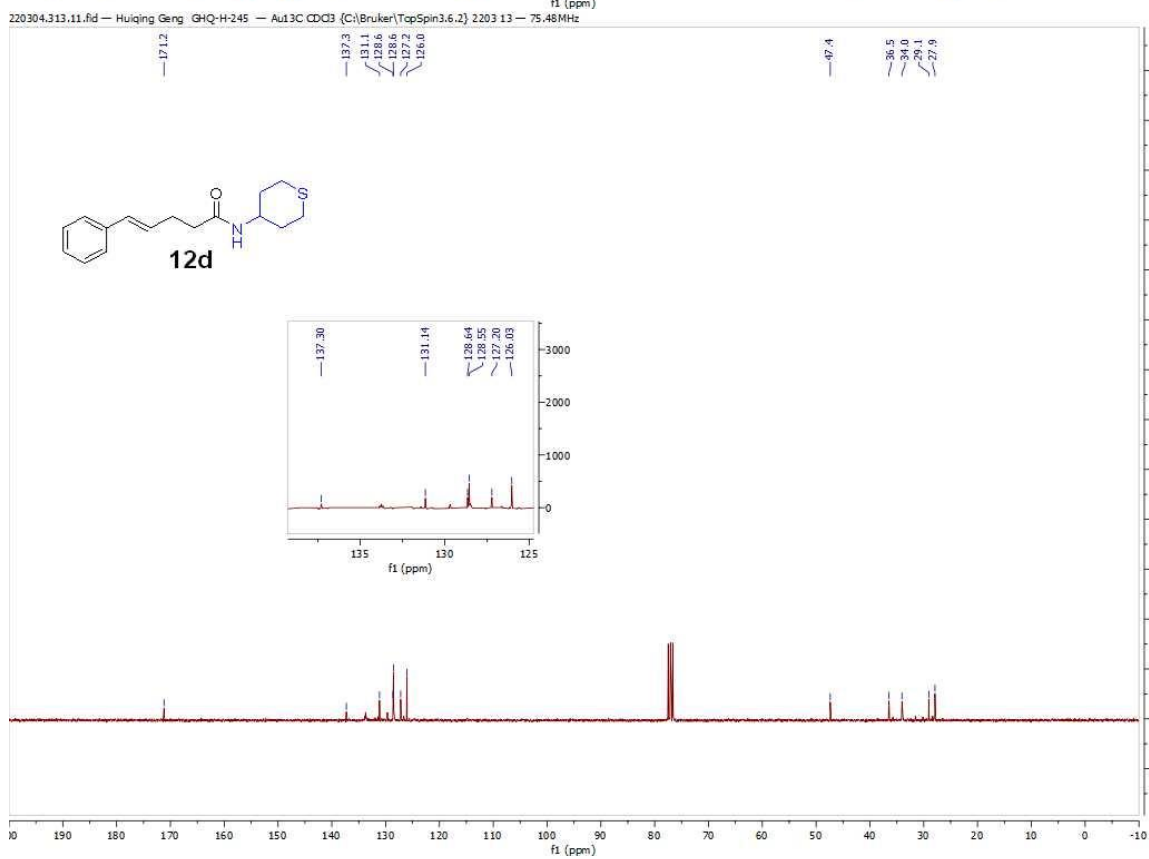

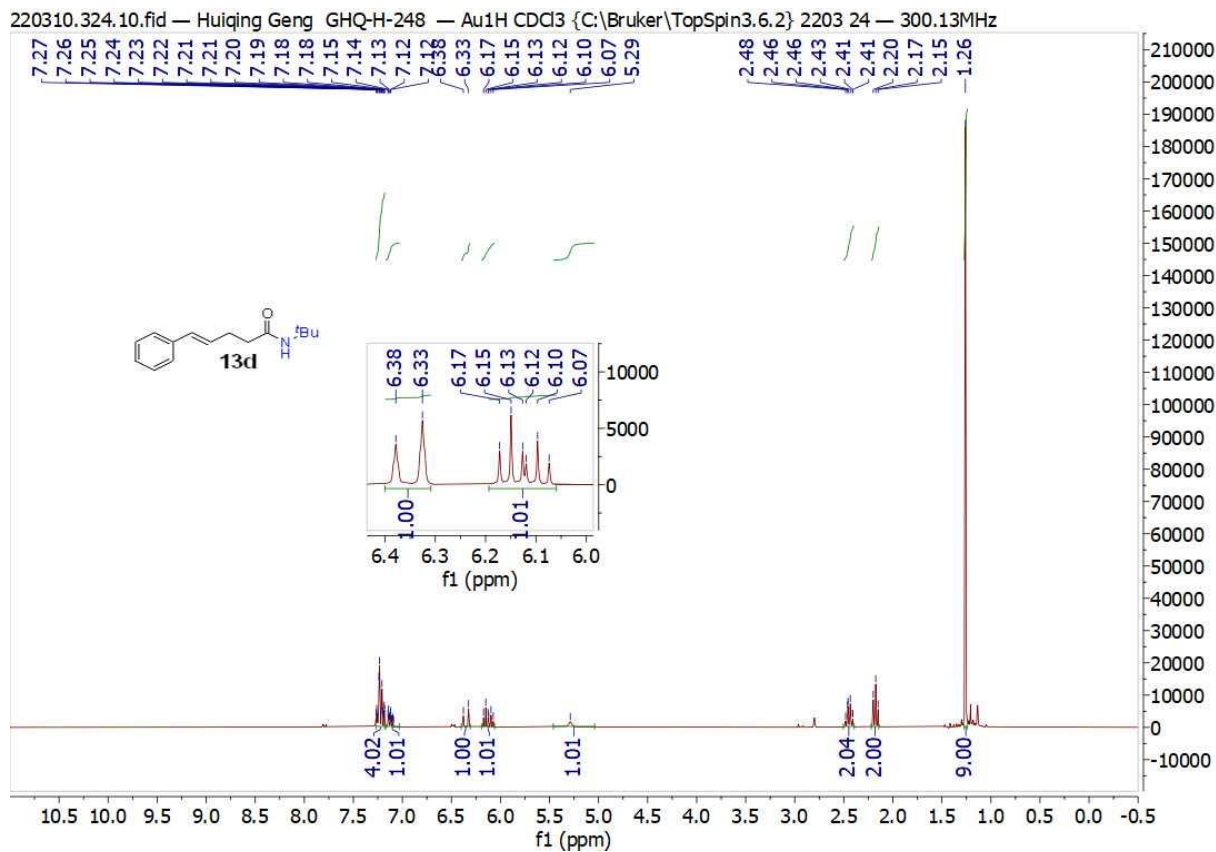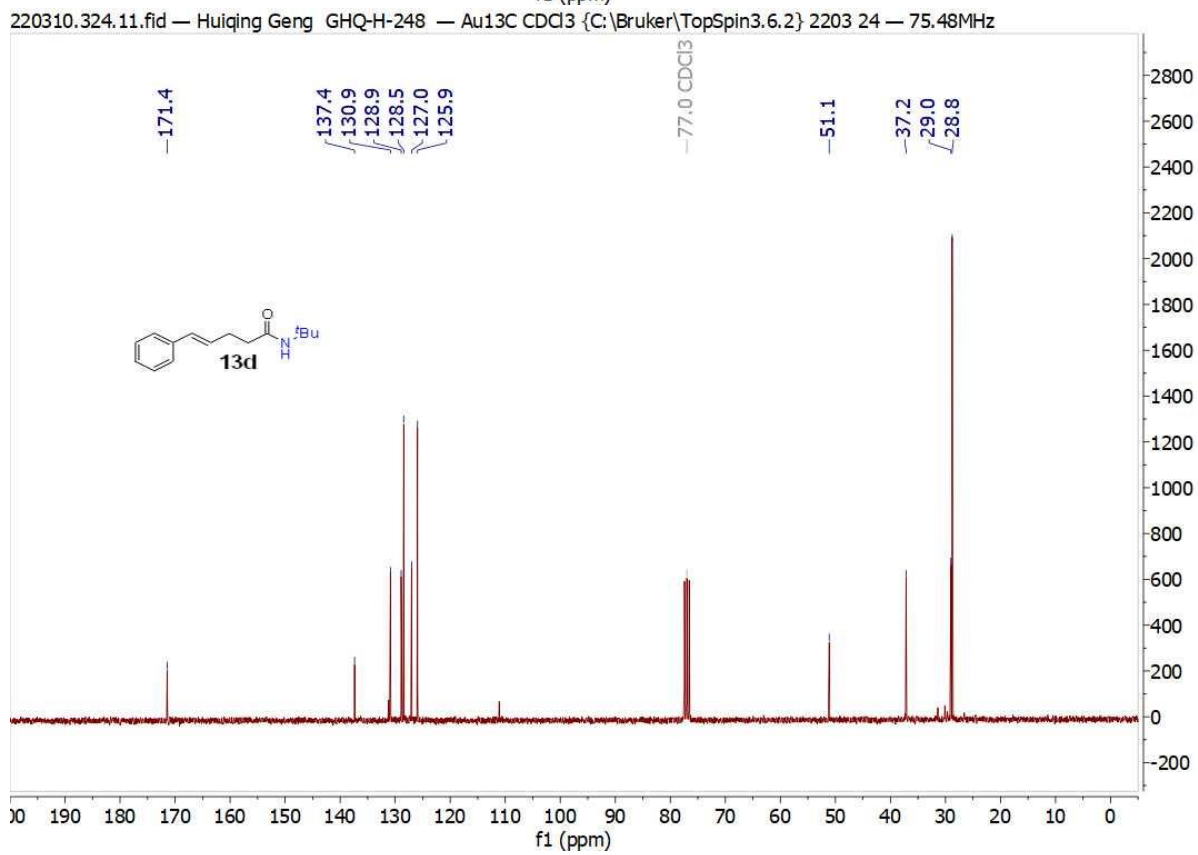

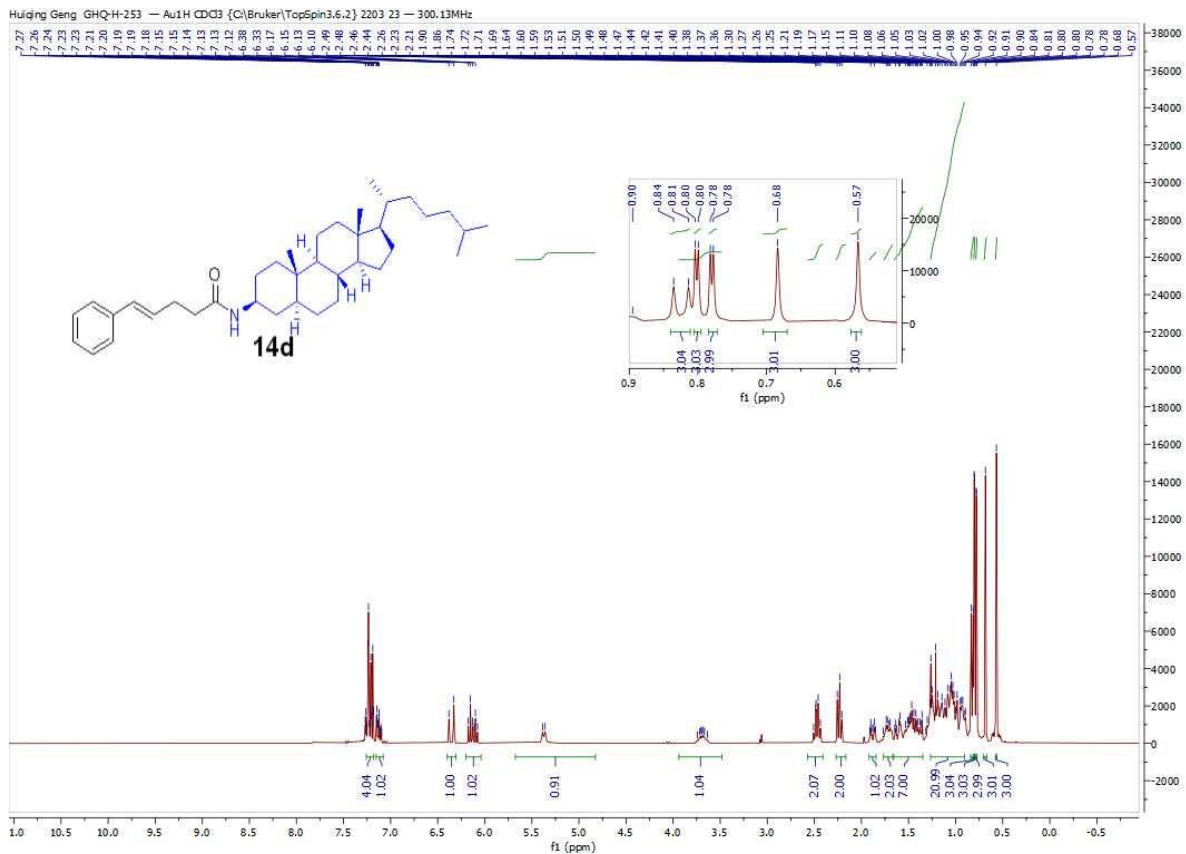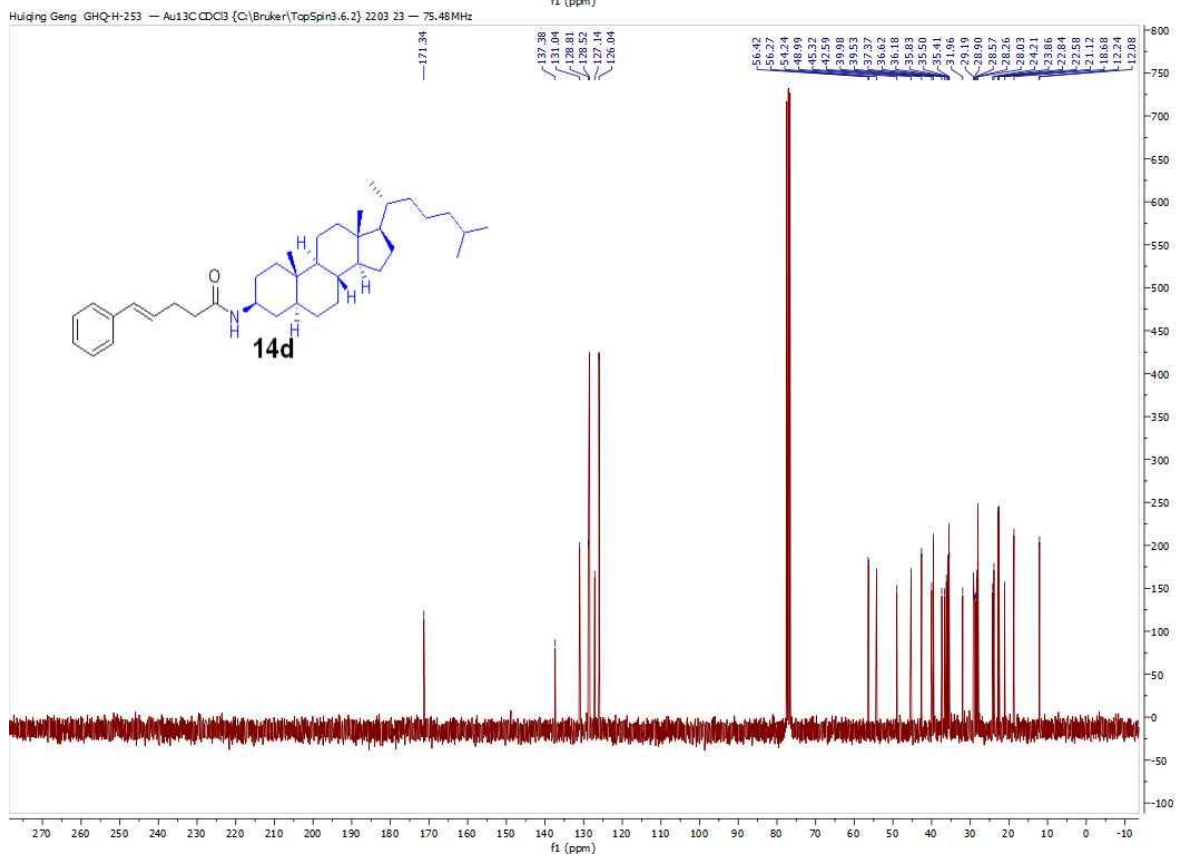

Supplement: d2cc02301f1.pdf [file d2cc02301f1.pdf]
